# Supplementary material for: Selective phenyl-oxime algicides with low non-target acute toxicity: efficacy against green microalgae vs glutaraldehyde
Source: Research Square preprint supplement (doi:10.21203/rs.3.rs-7558839/v1), 2025-09-17
Supplement: Supplementary file 1 [file e23050b37fb46ea92d6b0a7b.docx]

**Supplementary Information**

**Selective phenyl-oxime algicides with low non-target acute toxicity: efficacy against green microalgae vs glutaraldehyde**

Jun Young Lee1,2, Yeo Jin Kim2,3, Bong Gyu Choi4, Jin-Seog Kim4,5, Hasoo Seong4, Chul Min Park2, Hyun Suk Yeom4, Seok Ki Min6, Hyeung-geun Park1,*, Joon-Ho Lee2,*

1Research Institute of Pharmaceutical Sciences, College of Pharmacy, Seoul National University, Seoul 08826, Republic of Korea

2Infectious Diseases Therapeutics Research Center, Korea Research Institute of Chemical Technology, 141 Gajeong-ro, Yuseong-gu, Daejeon 34114, Republic of Korea

3School of Pharmacy, Sungkyunkwan University, Suwon 16419, Republic of Korea

4Eco-Friendly New Materials Research Center, Korea Research Institute of Chemical Technology, 141 Gajeong-ro, Yuseong-gu, Daejeon 34114, Republic of Korea

5Research Development Division, Daeseungbiofarm Co. Ltd, Daejeon 34127, Republic of Korea

6Korea Testing & Research Institute, Jeonju-si, Jeollabuk-do, Republic of Korea

***Corresponding Authors:** E-mail: [hgpk@snu.ac.kr](mailto:hgpk@snu.ac.kr) (H.-g. Park), Tel: +82-2-880-7871, Fax: +82-2-872-9129, E-mail: [jh_k@krict.re.kr](mailto:jh_k@krict.re.kr) (J.-H. Lee), Tel: +82-42-860-7693

**Table of contents:**

1.1H NMR and 13C NMR data for intermediates……………………………………..………S3

2. 1H NMR and 13C NMR data for title compounds…………………………………………S18

3. **Figure S1**. Pictures of growth inhibition responses of *Scenedesmus rotundus* (Scero) and *Lemna paucicostata* (LEMPA) treated with 3 concentrations of (A) **KH04**, (B) **KH08**, and (C) **KH21**……………………………………………………………………………………….S49

**
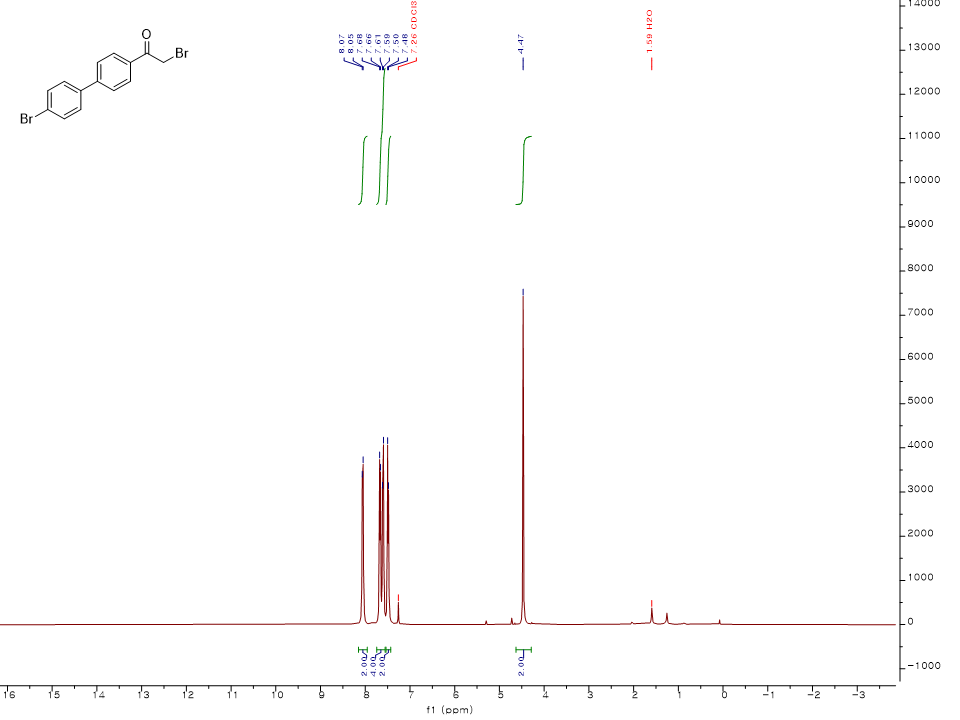
**

1H NMR spectrum (400 MHz, CDCl3) of **2**

**
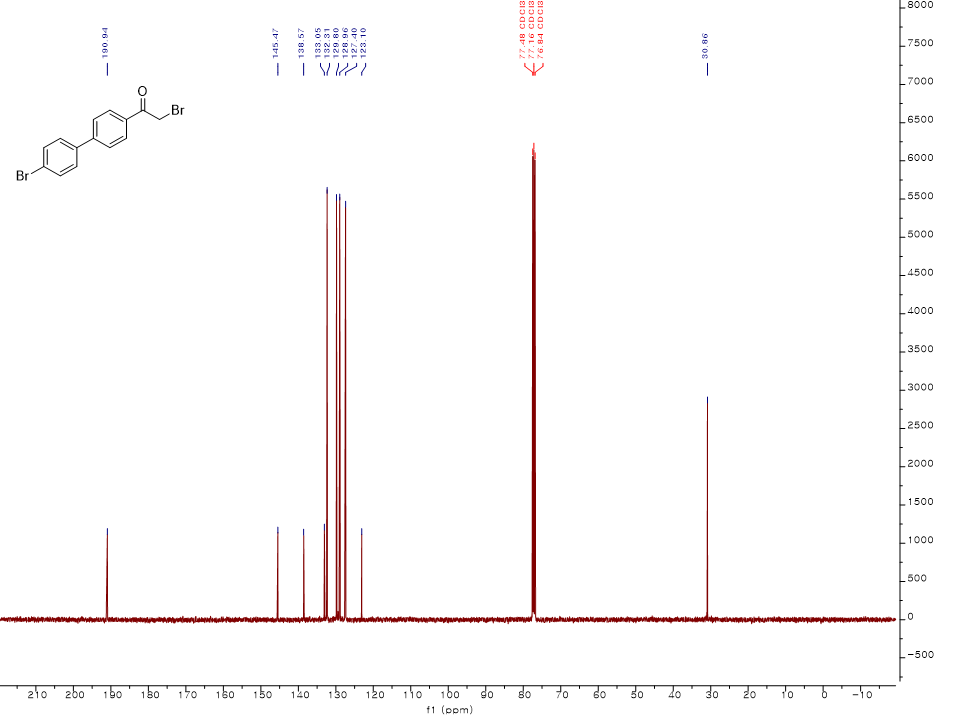
**

13C NMR spectrum (100 MHz, CDCl3) of **2**

**
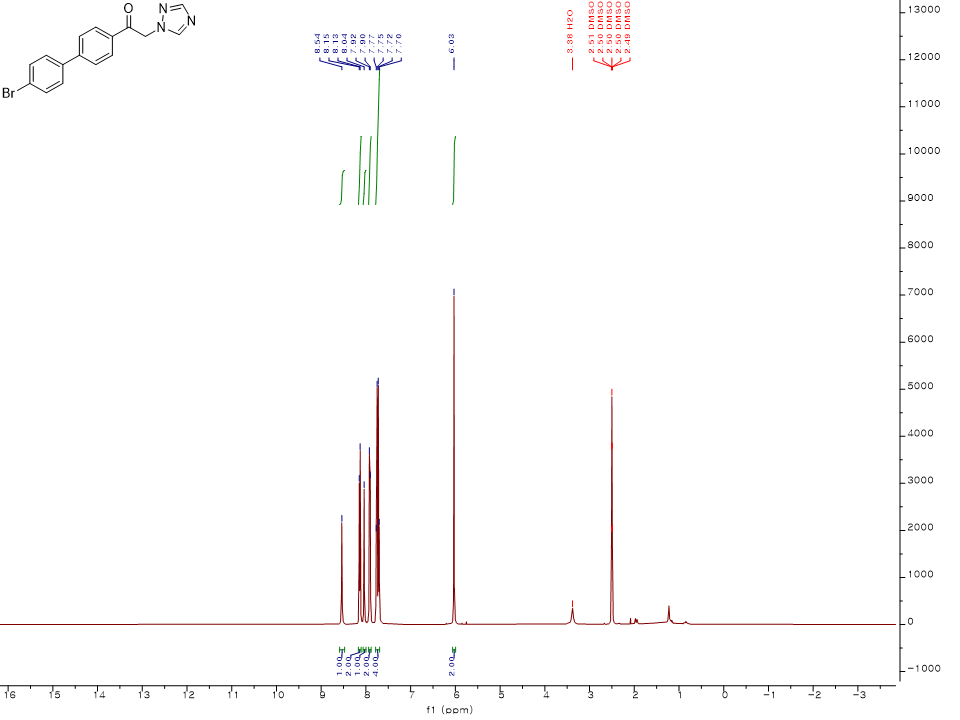
**

1H NMR spectrum (400 MHz, DMSO-*d6*) of **3**


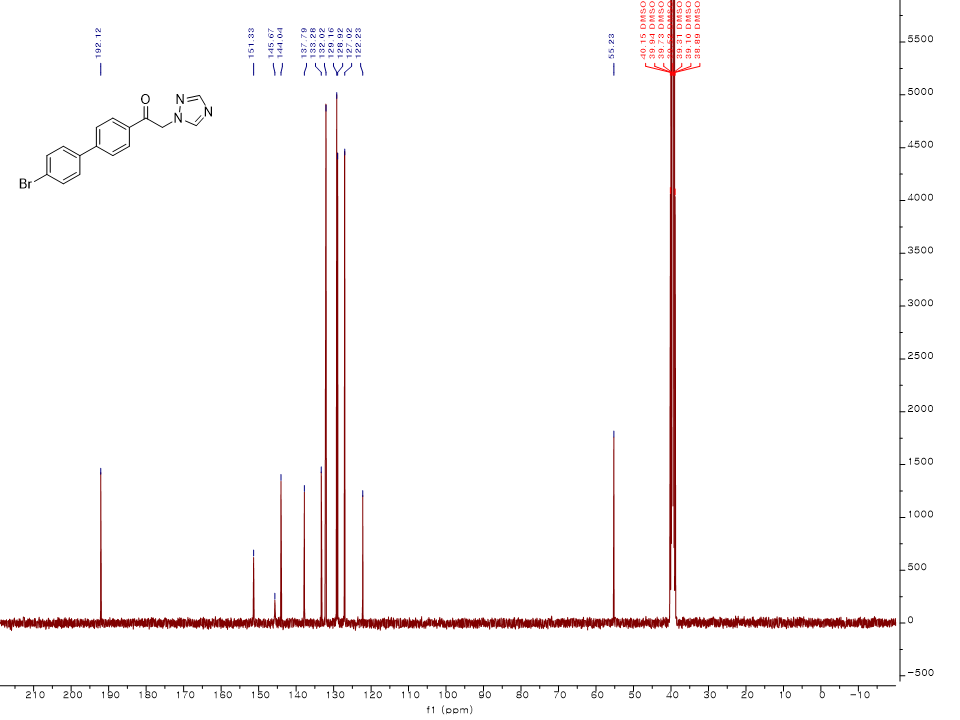


13C NMR spectrum (100 MHz, DMSO-*d6*) of **3**

**
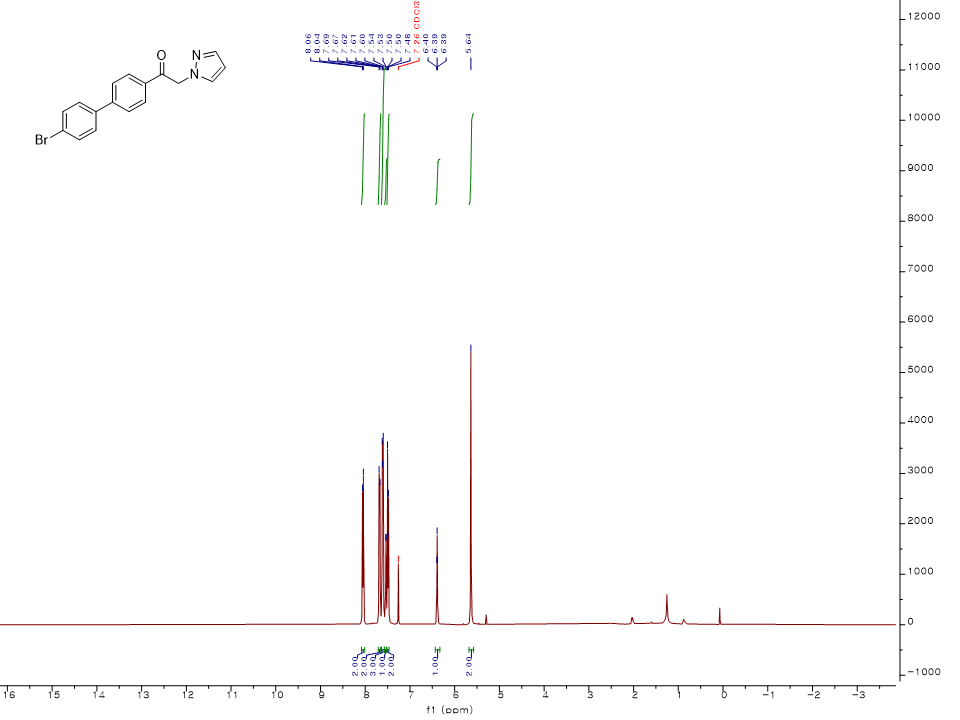
**

1H NMR spectrum (400 MHz, CDCl3) of **4**

**
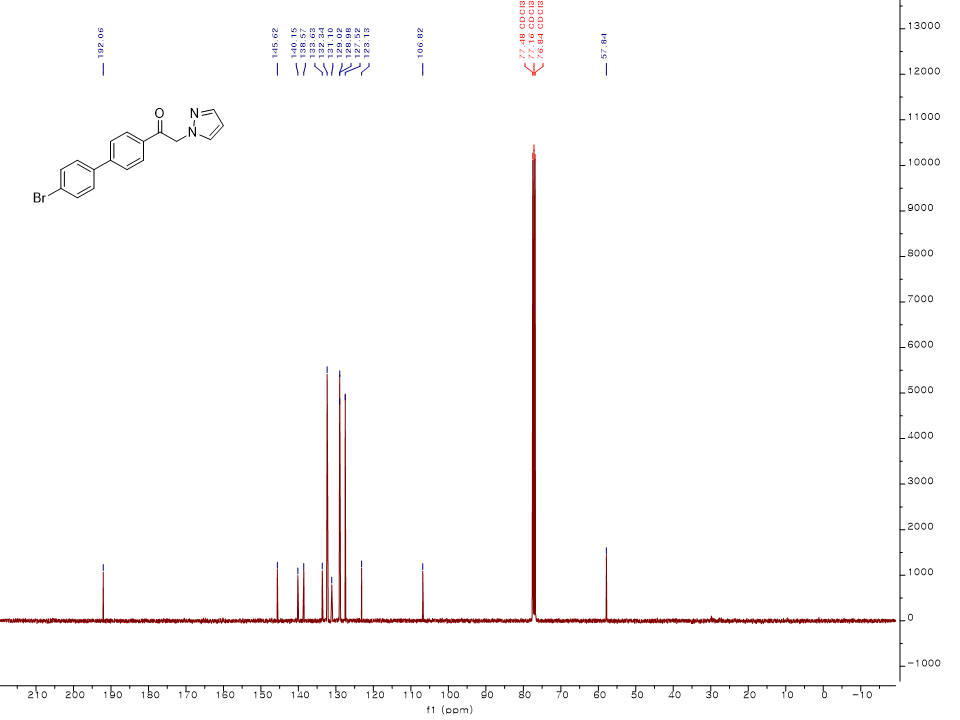
**

13C NMR spectrum (100 MHz, CDCl3) of **4**

**
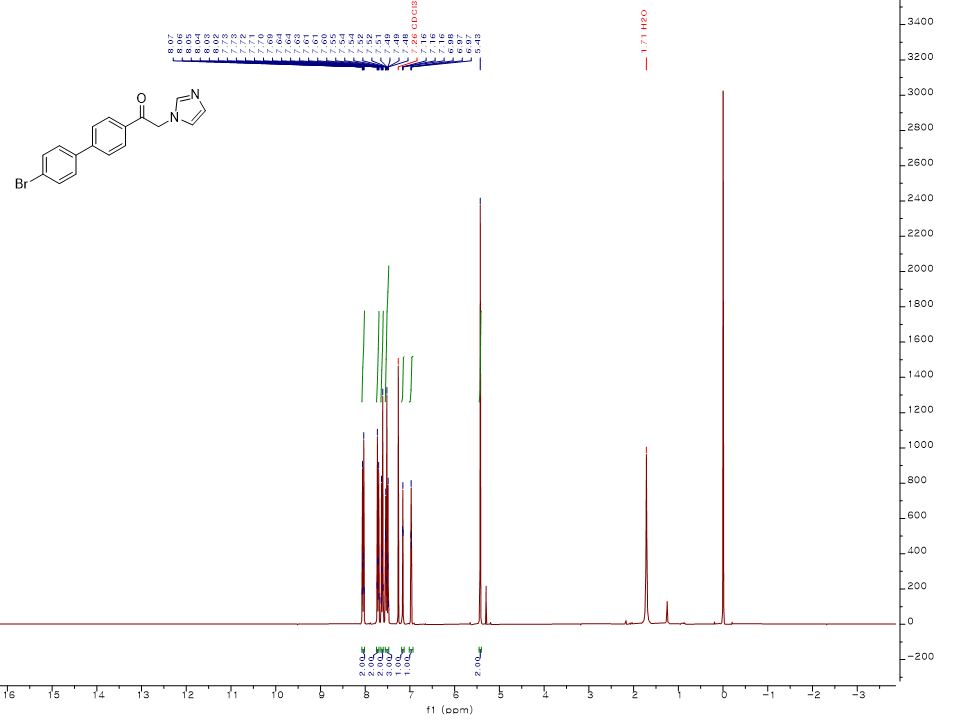
**

1H NMR spectrum (300 MHz, CDCl3) of **5**

**
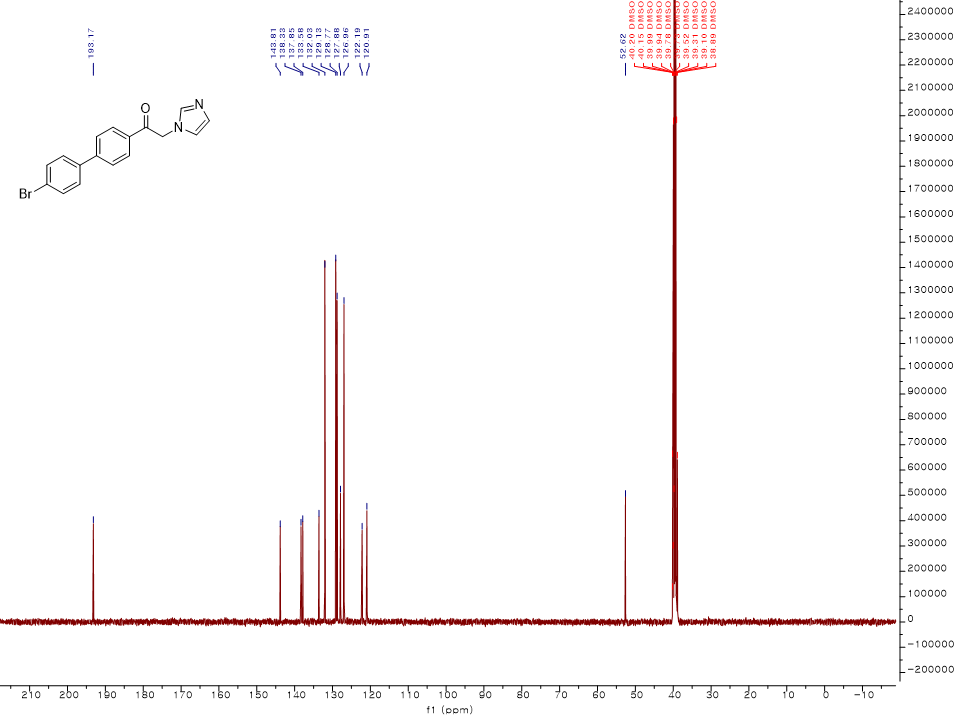
**

13C NMR spectrum (100 MHz, DMSO-*d6*) of **5**

**
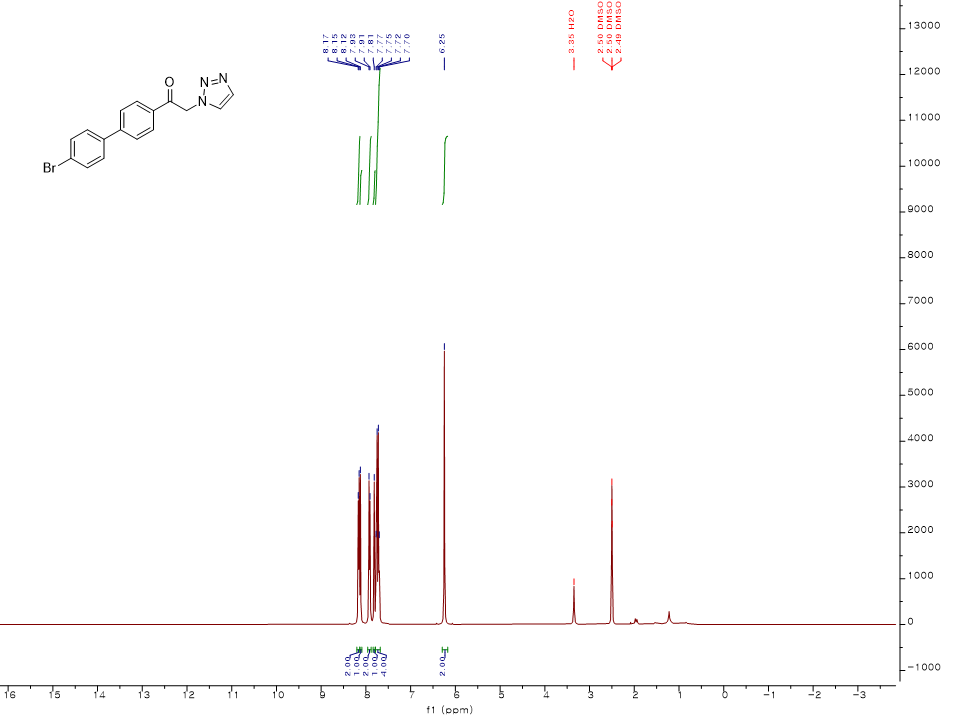
**

1H NMR spectrum (400 MHz, DMSO-*d6*) of **6**

**
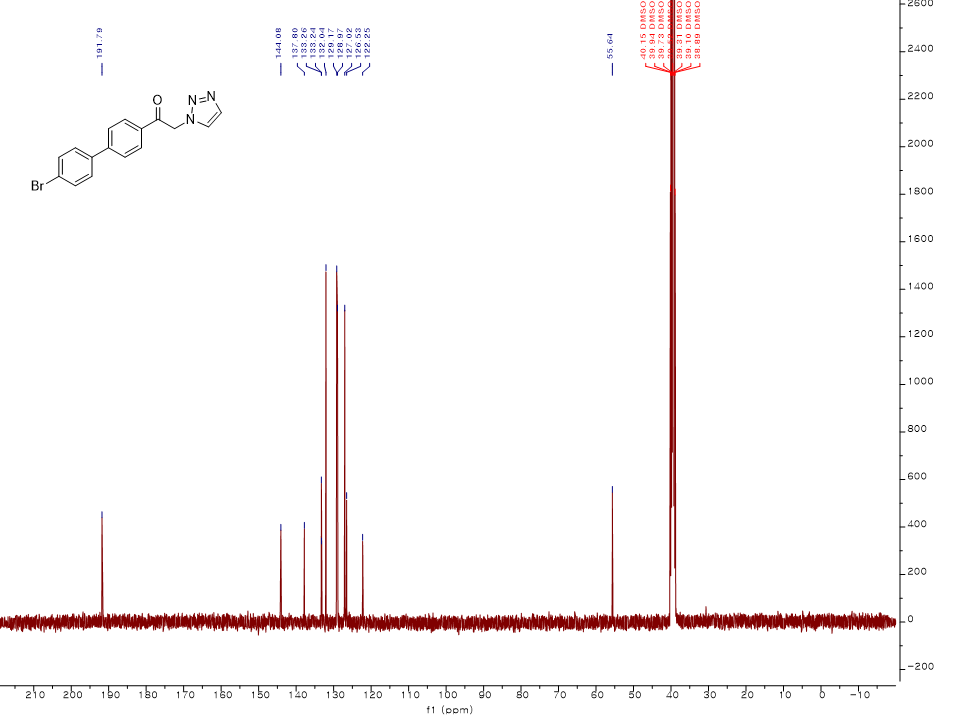
**

13C NMR spectrum (100 MHz, DMSO-*d6*) of **6**

**
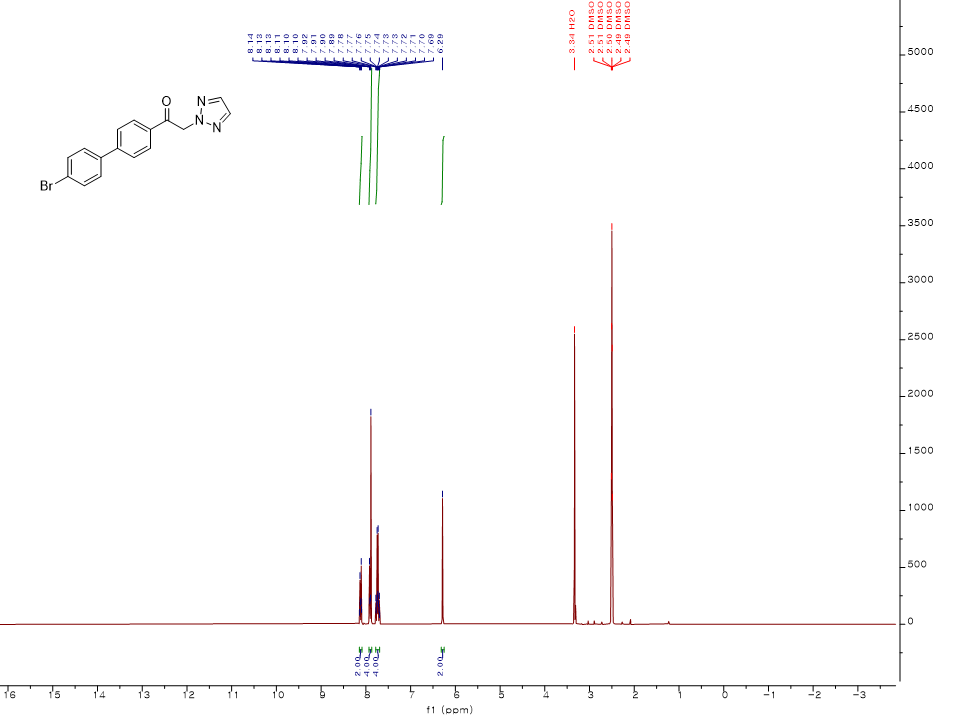
**

1H NMR spectrum (300 MHz, DMSO-*d6*) of **7**

**
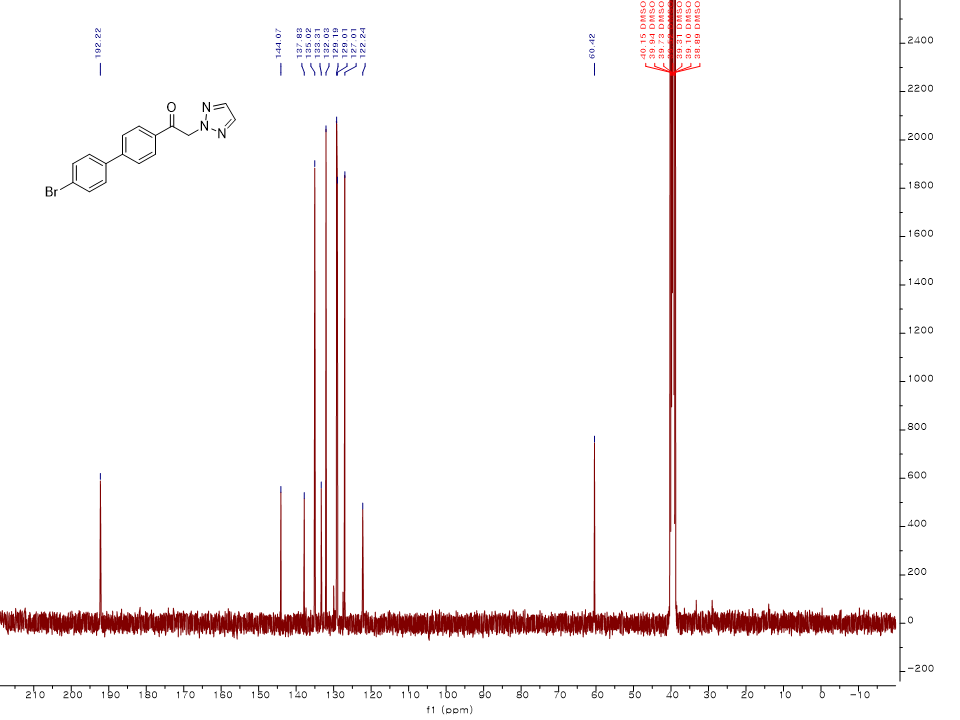
**

13C NMR spectrum (100 MHz, DMSO-*d6*) of **7**

**
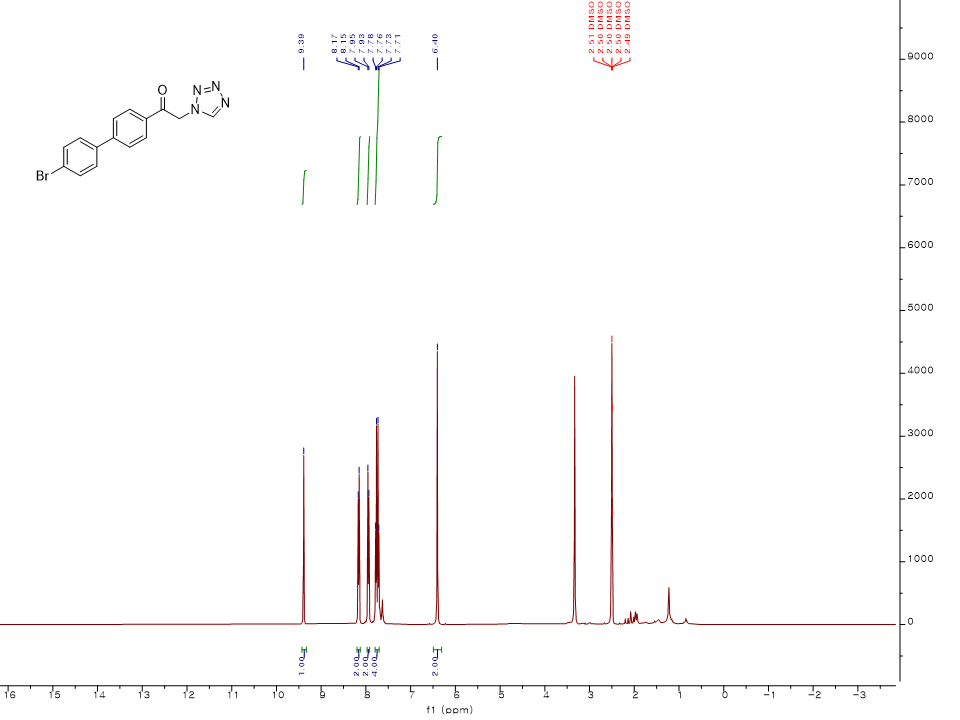
**

1H NMR spectrum (400 MHz, DMSO-*d6*) of **8**

**
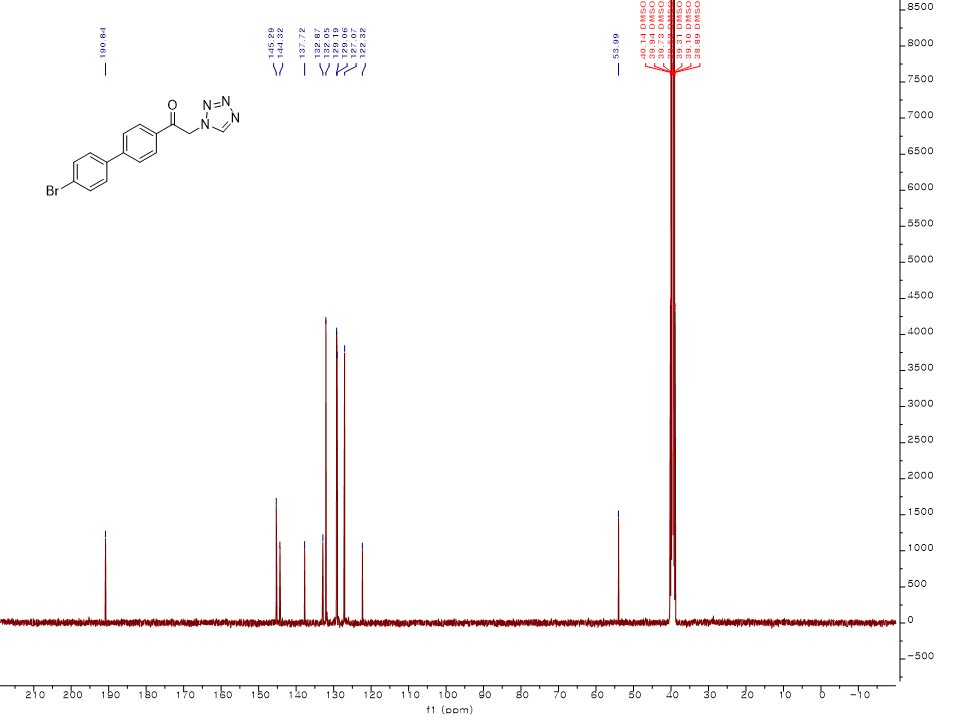
**

13C NMR spectrum (100 MHz, DMSO-*d6*) of **8**

**
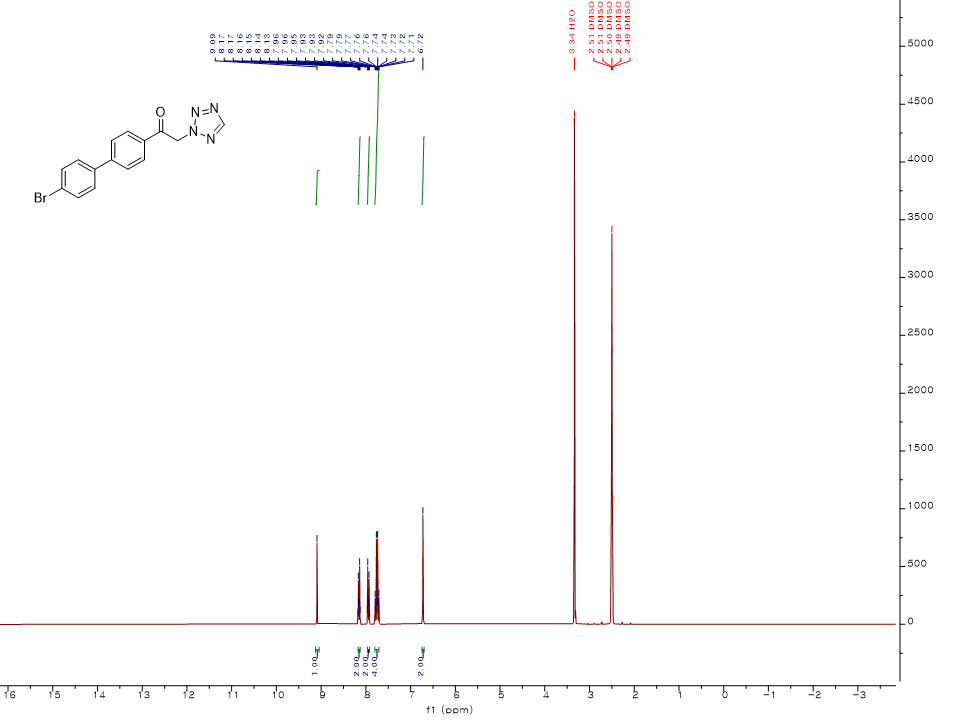
**

1H NMR spectrum (300 MHz, DMSO-*d6*) of **9**

**
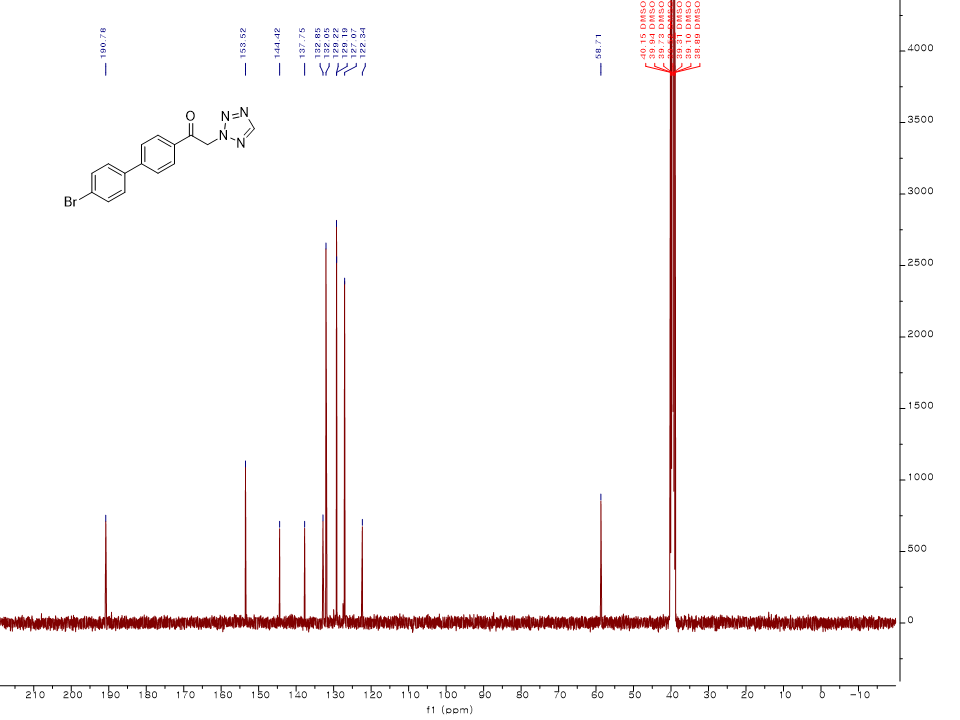
**

13C NMR spectrum (100 MHz, DMSO-*d6*) of **9**

**
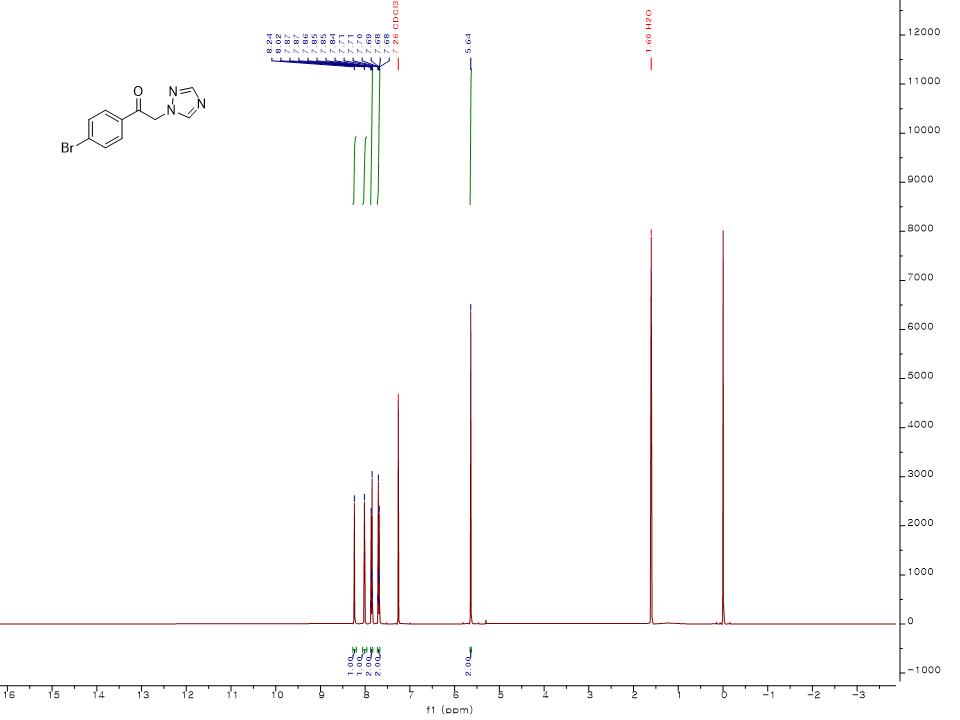
**

1H NMR spectrum (400 MHz, CDCl3) of **11**

**
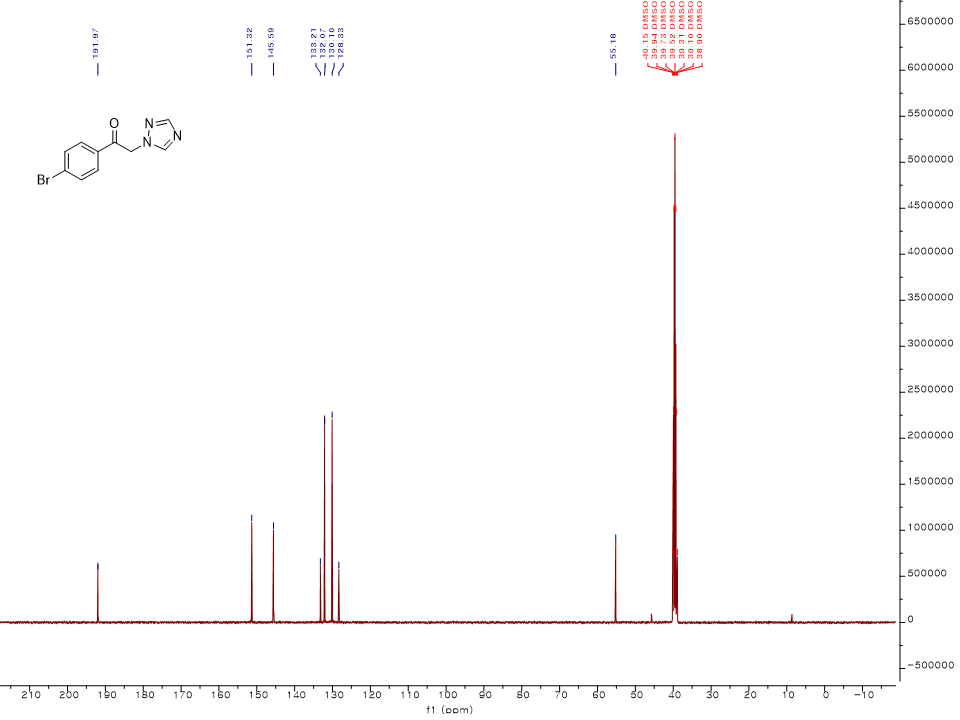
**

13C NMR spectrum (100 MHz, DMSO-*d6*) of **11**

**
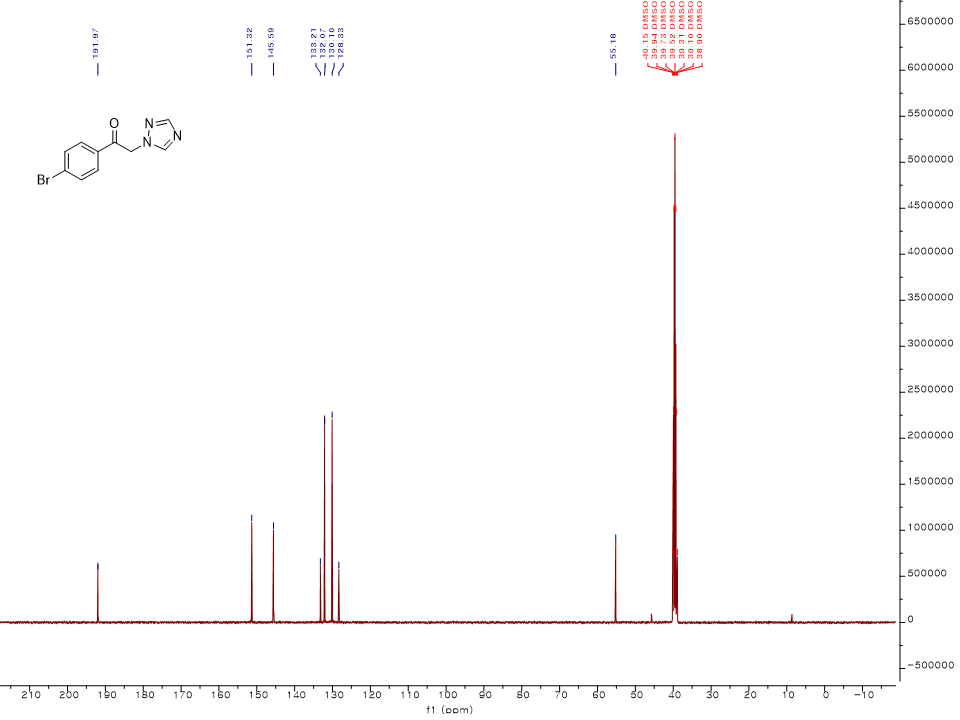
**

1H NMR spectrum (400 MHz, DMSO-*d6*) of **12**

**
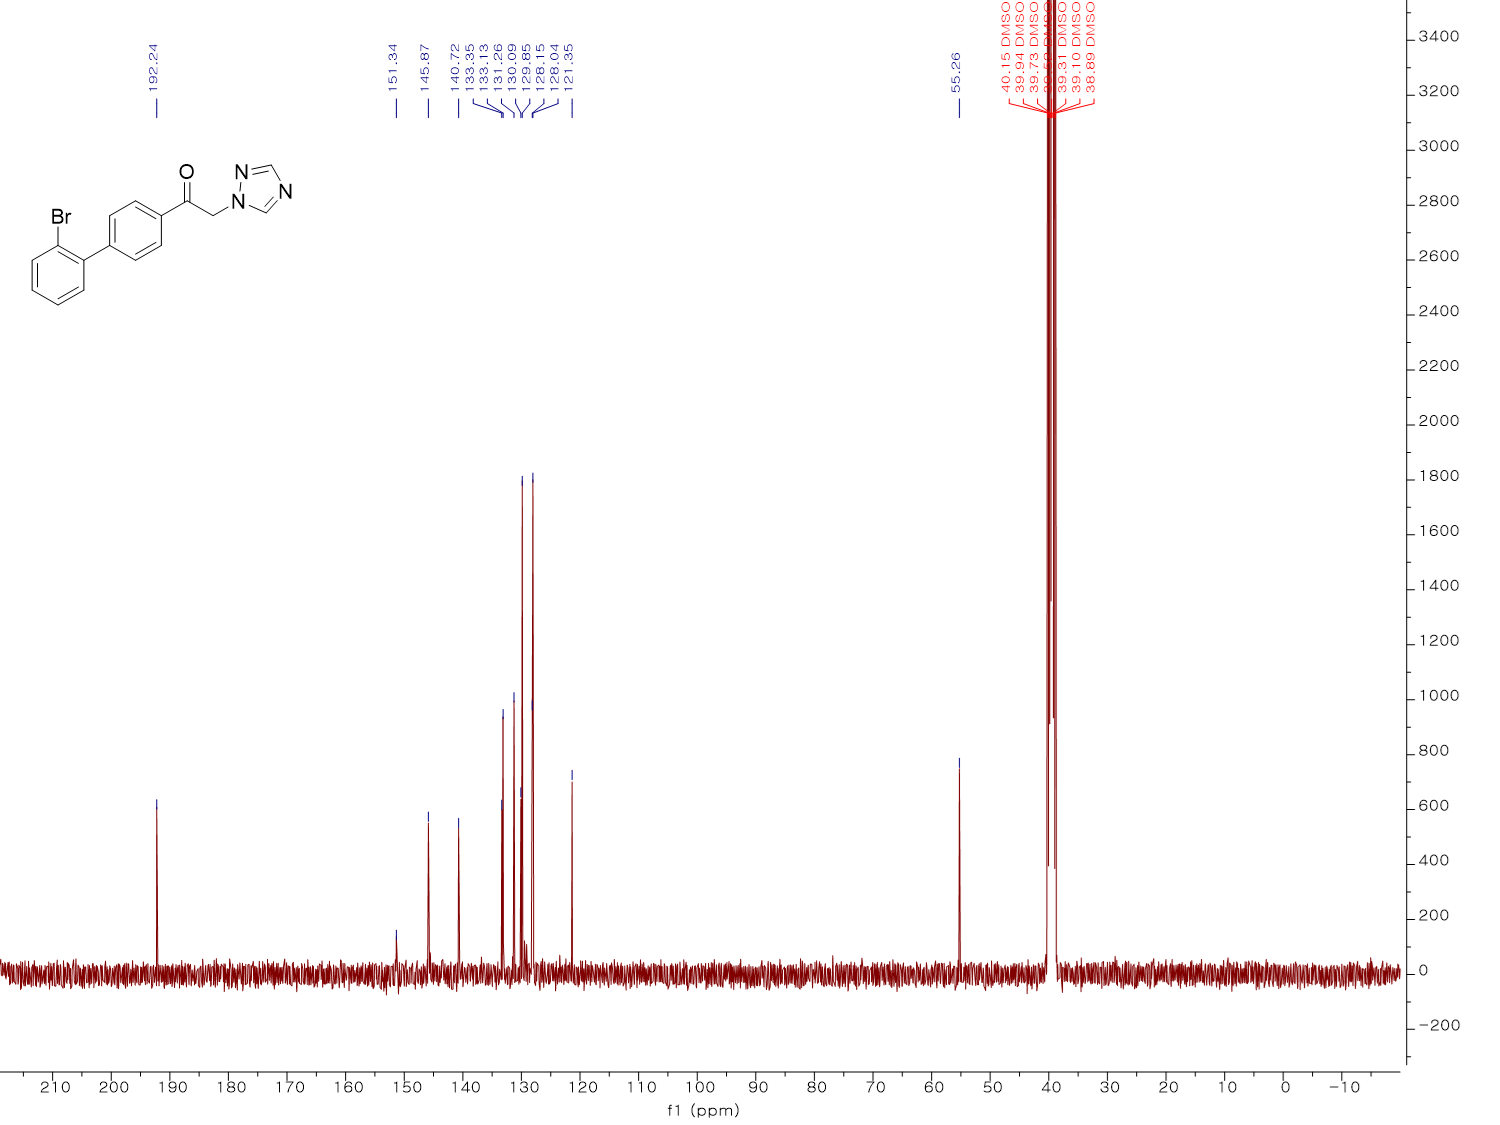
**

13C NMR spectrum (100 MHz, DMSO-*d6*) of **12**

**
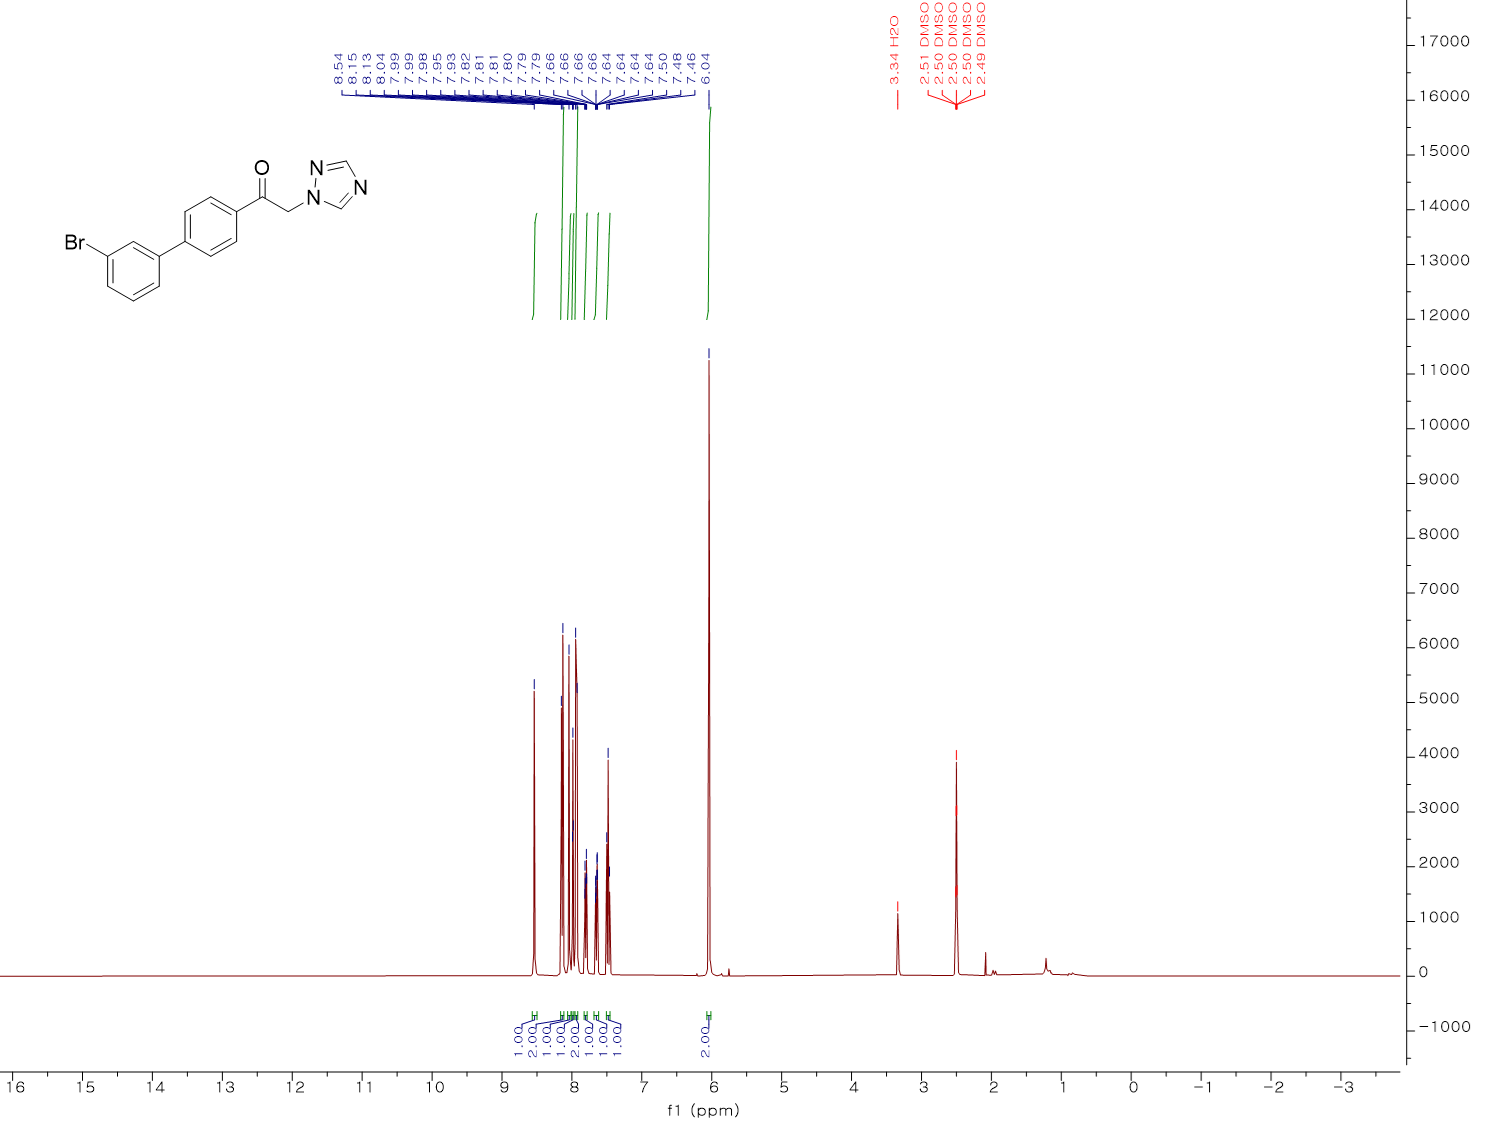
**

1H NMR spectrum (400 MHz, DMSO-*d6*) of **13**

**
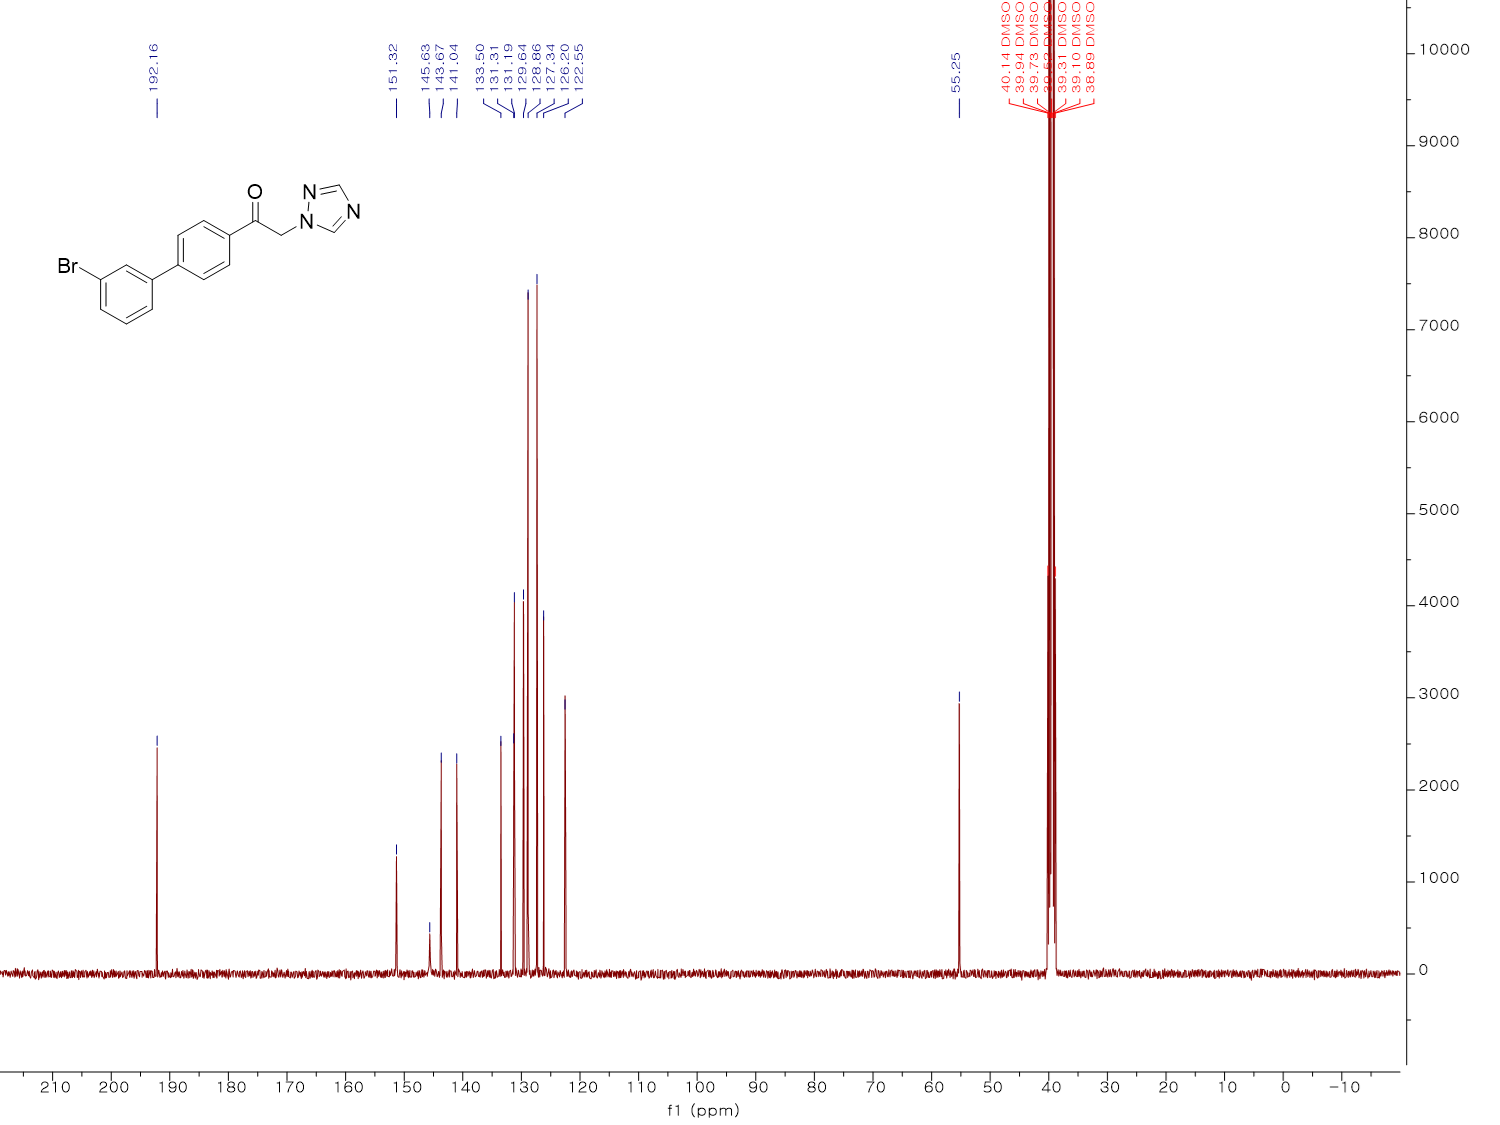
**

13C NMR spectrum (100 MHz, DMSO-*d6*) of **13**

**
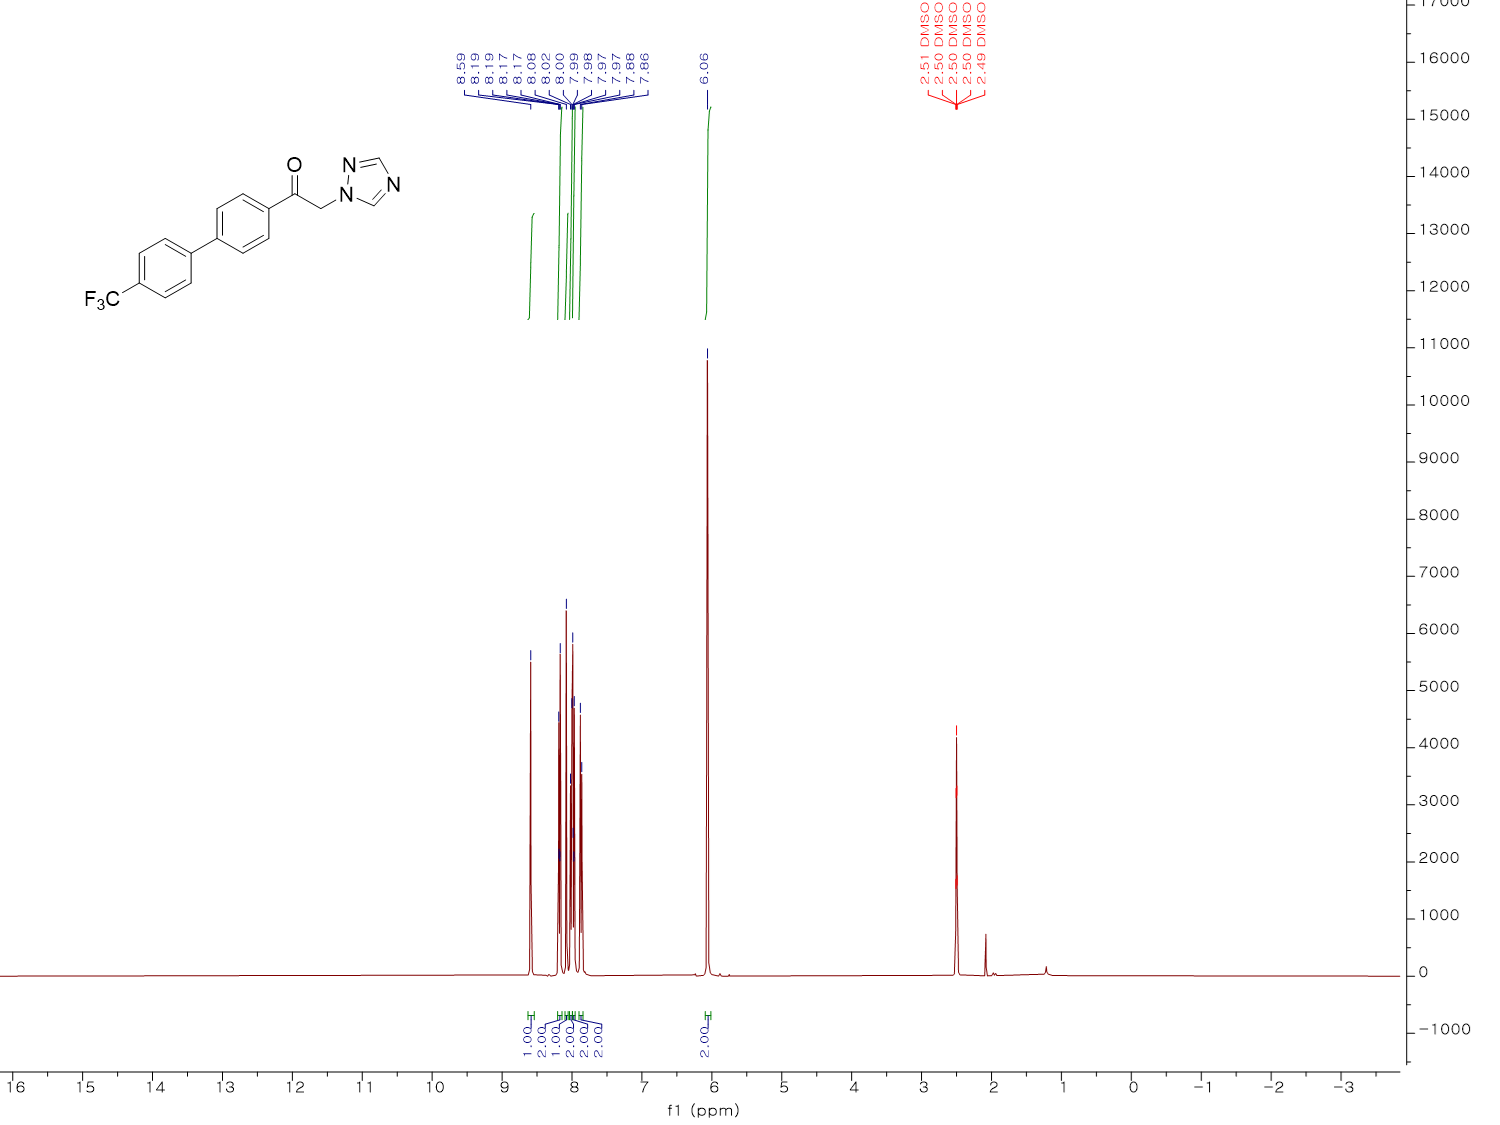
**

1H NMR spectrum (400 MHz, DMSO-*d6*) of **14**

**
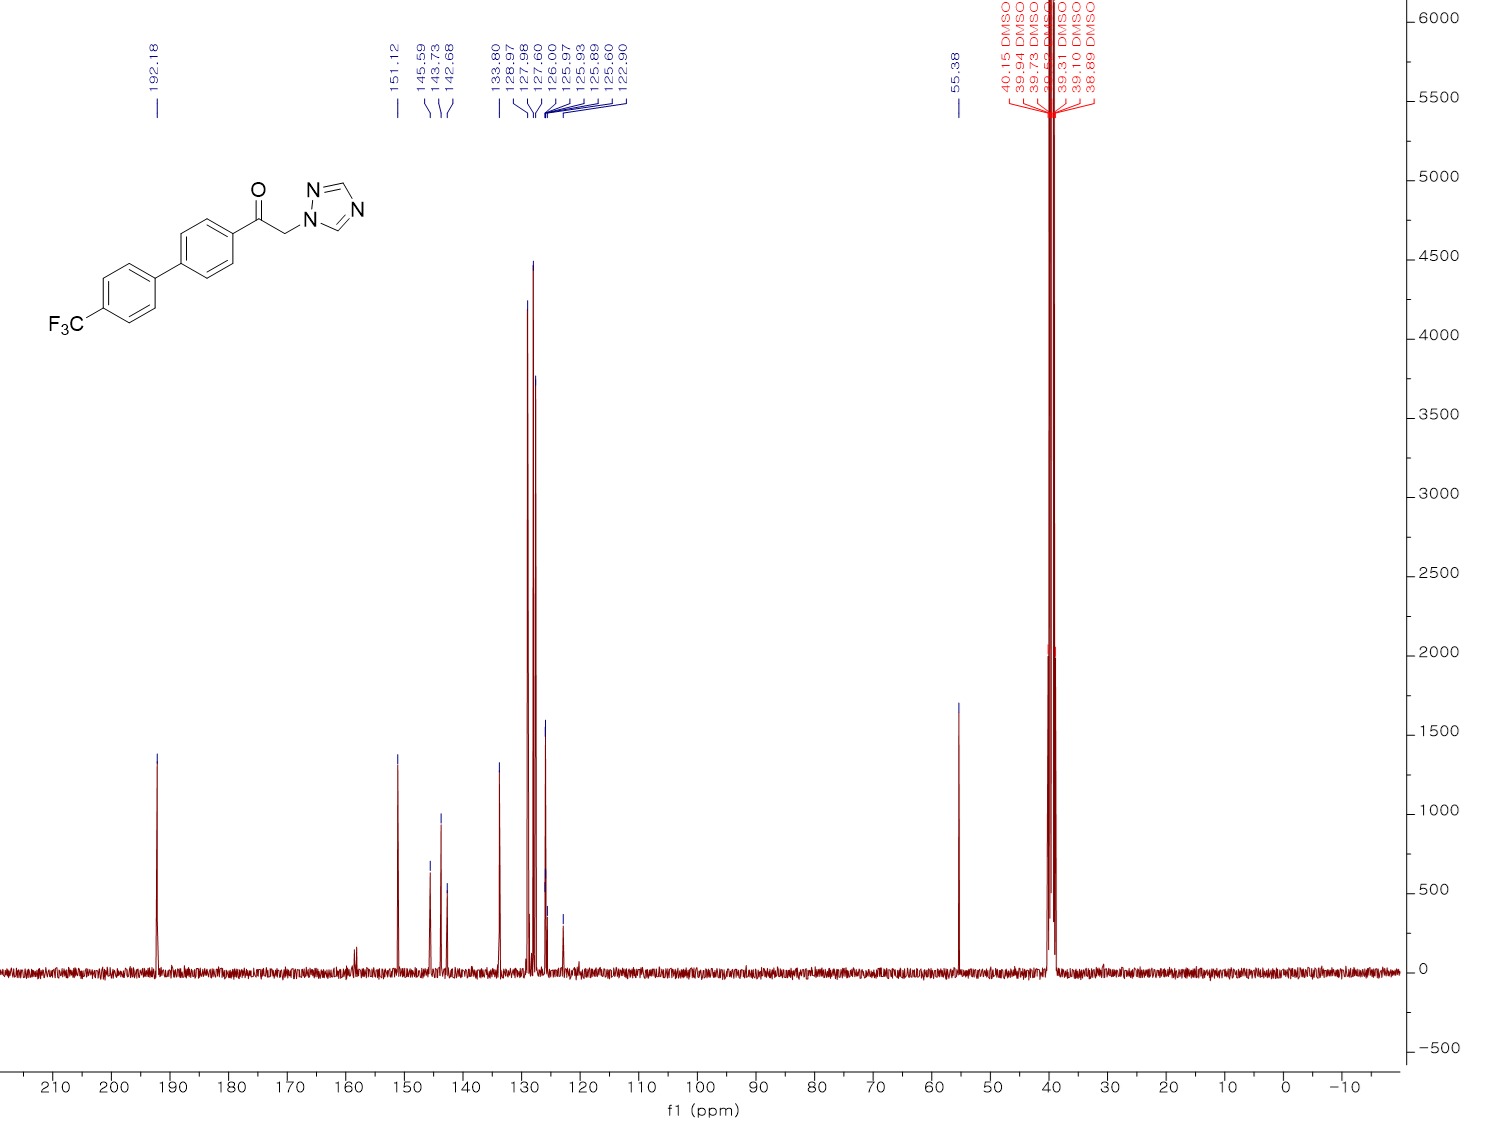
**

13C NMR spectrum (100 MHz, DMSO-*d6*) of **14**

**
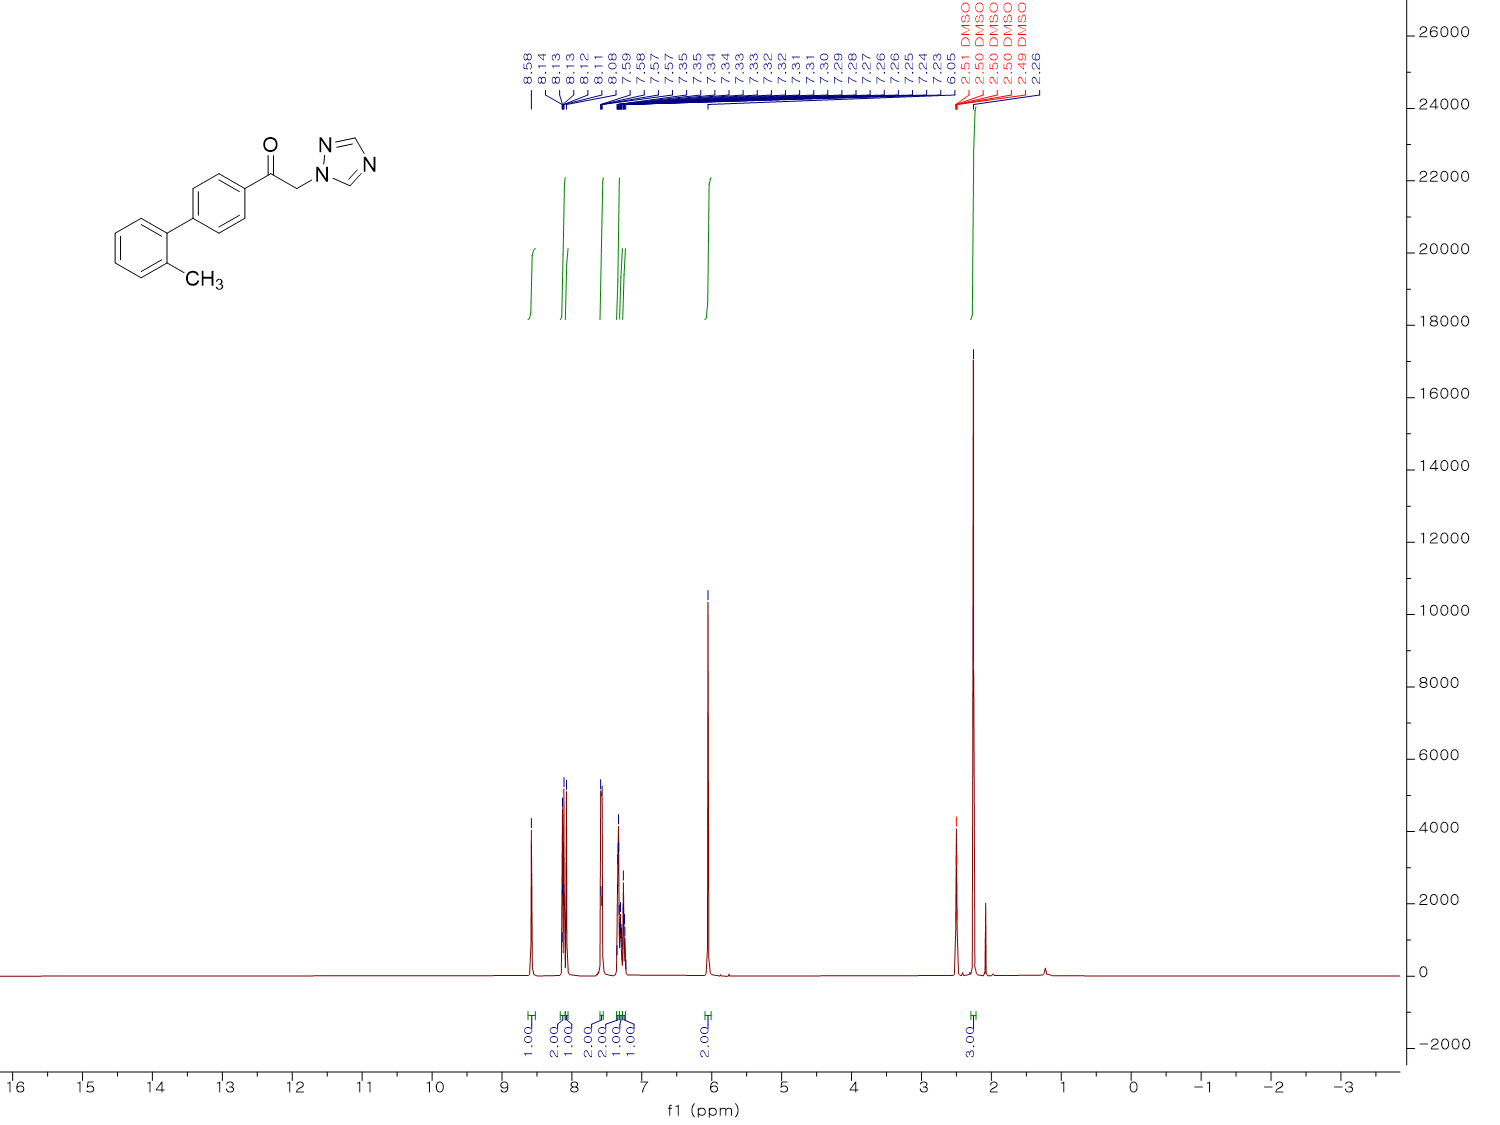
**

1H NMR spectrum (400 MHz, DMSO-*d6*) of **15**

**
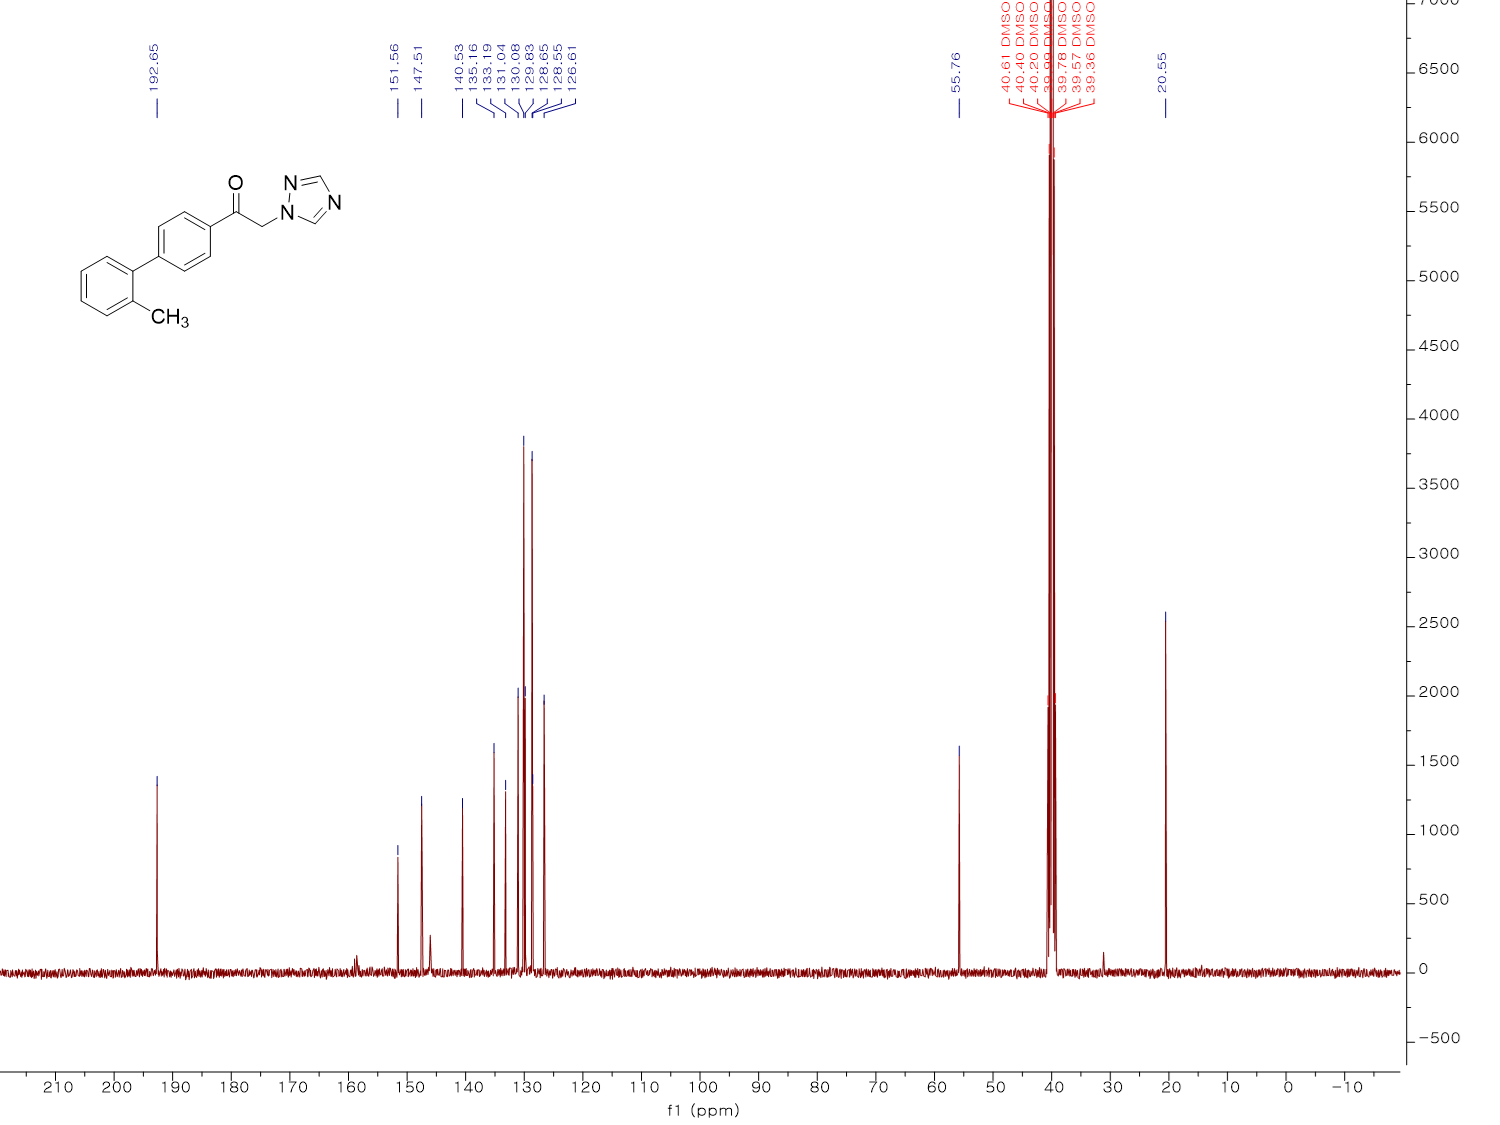
**

13C NMR spectrum (100 MHz, DMSO-*d6*) of **15**

**
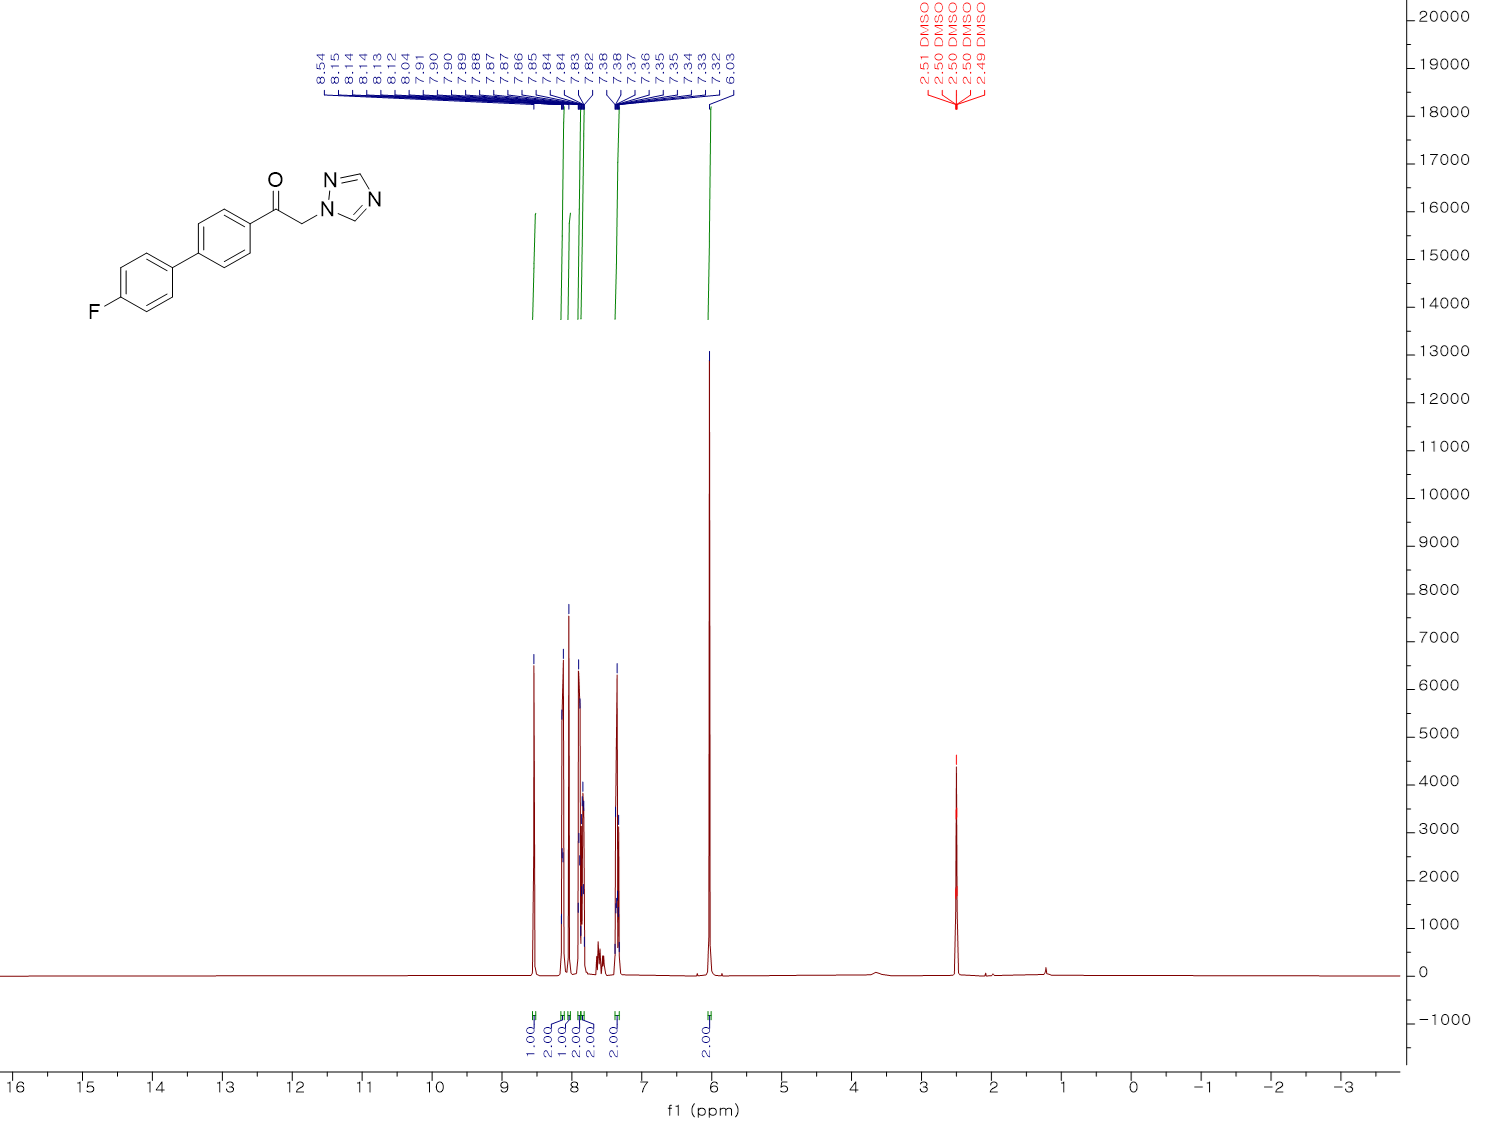
**

1H NMR spectrum (400 MHz, DMSO-*d6*) of **16**

**
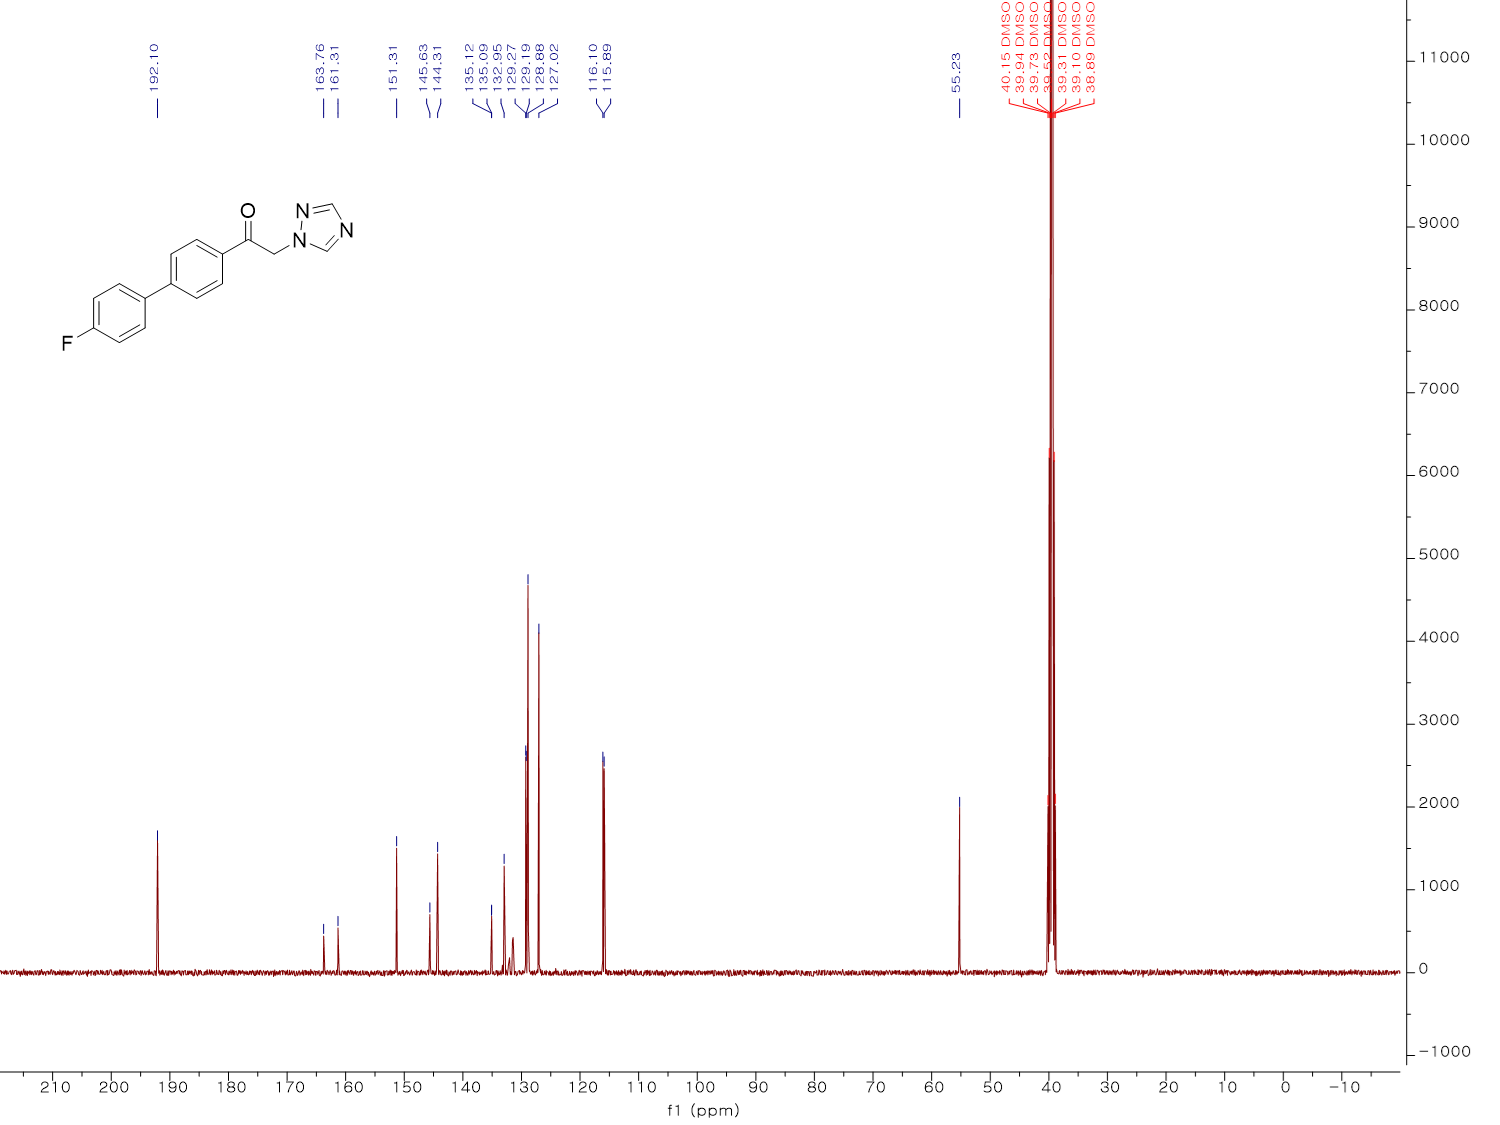
**

13C NMR spectrum (100 MHz, DMSO-*d6*) of **16**

**
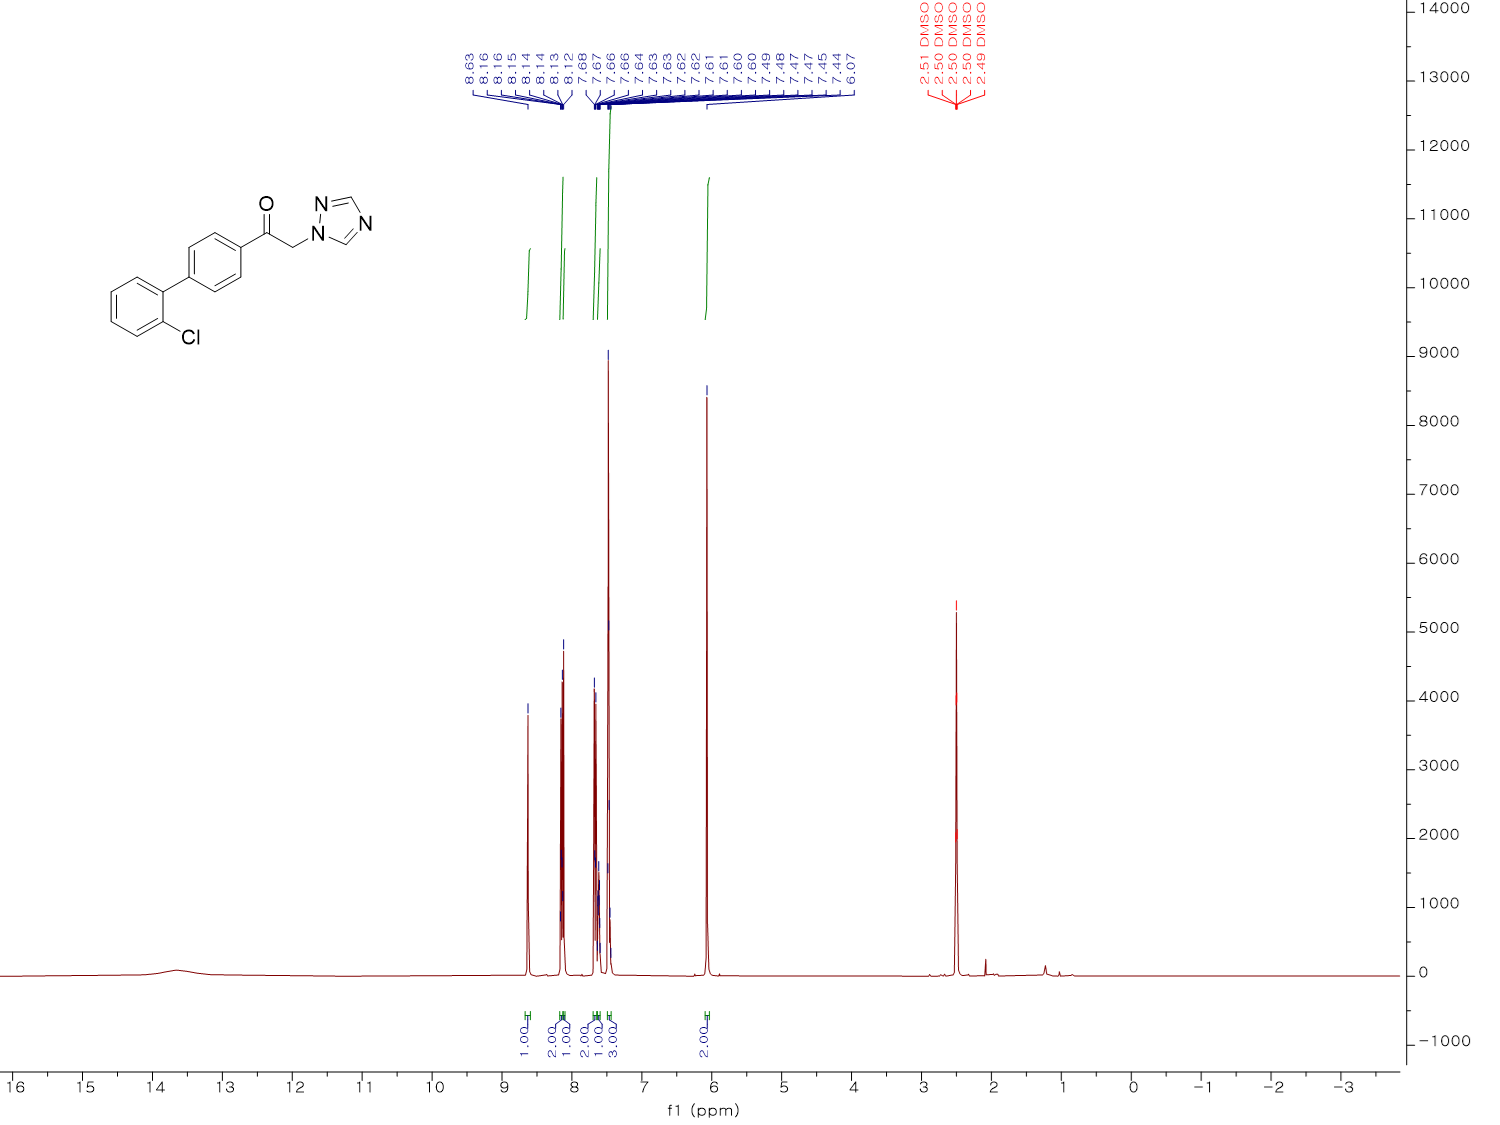
**

1H NMR spectrum (400 MHz, DMSO-*d6*) of **17**

**
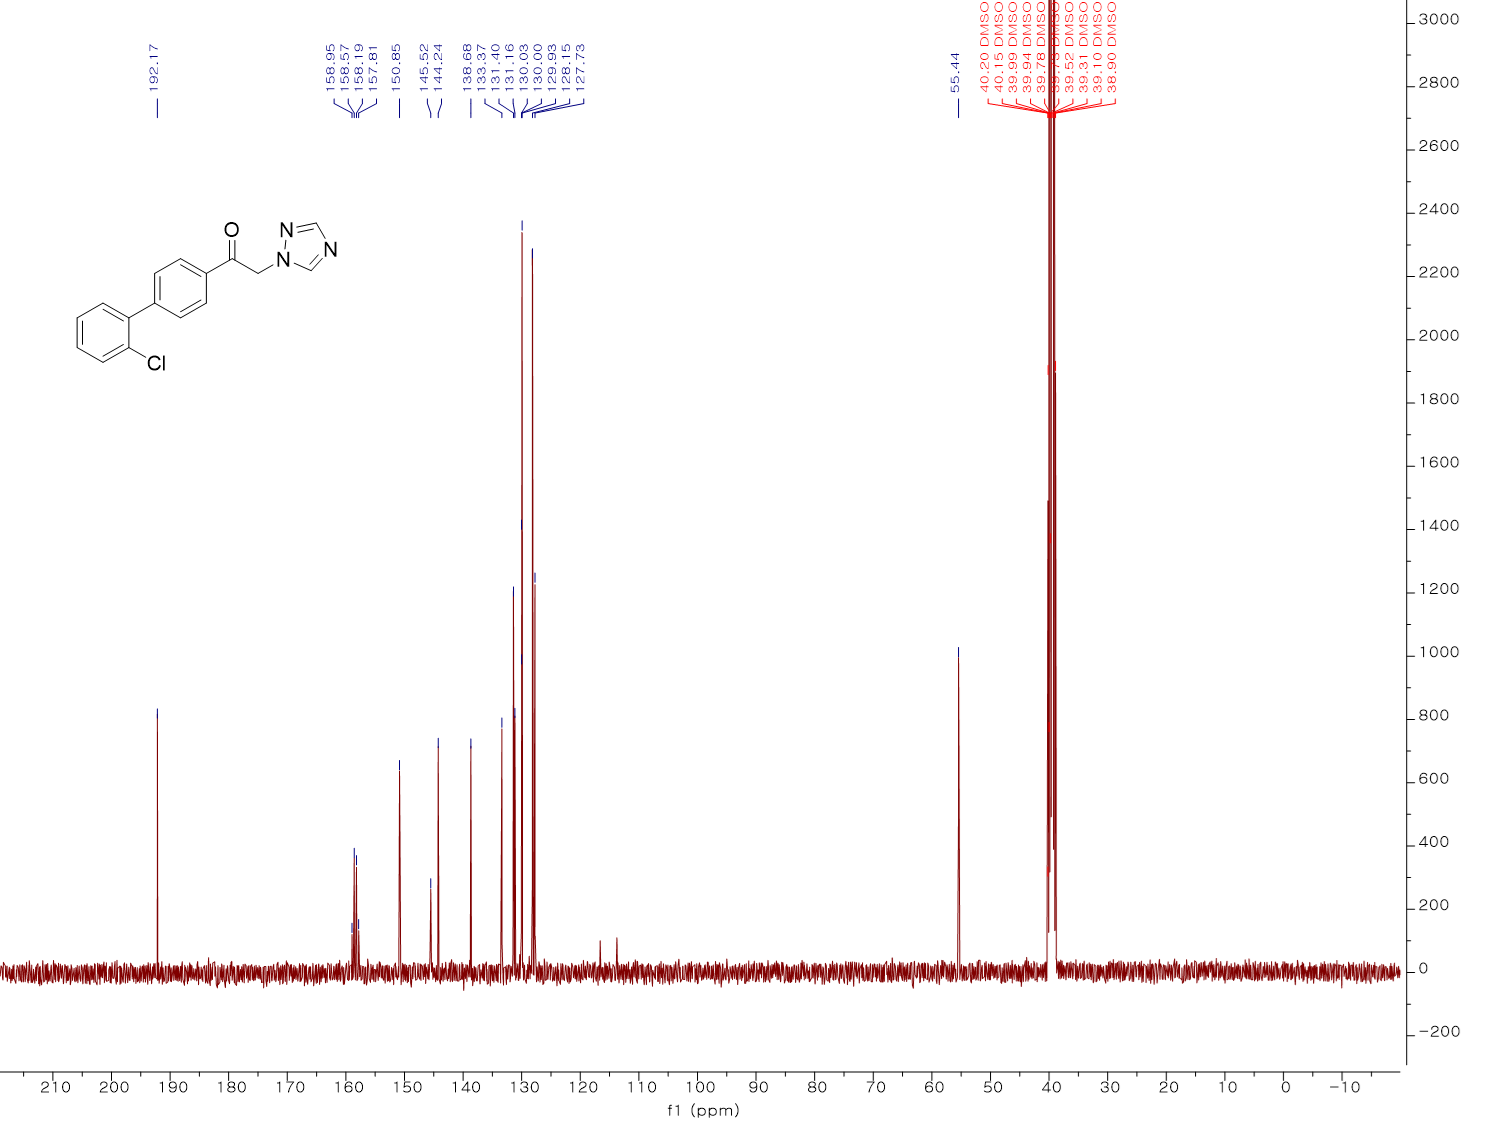
**

13C NMR spectrum (100 MHz, DMSO-*d6*) of **17**


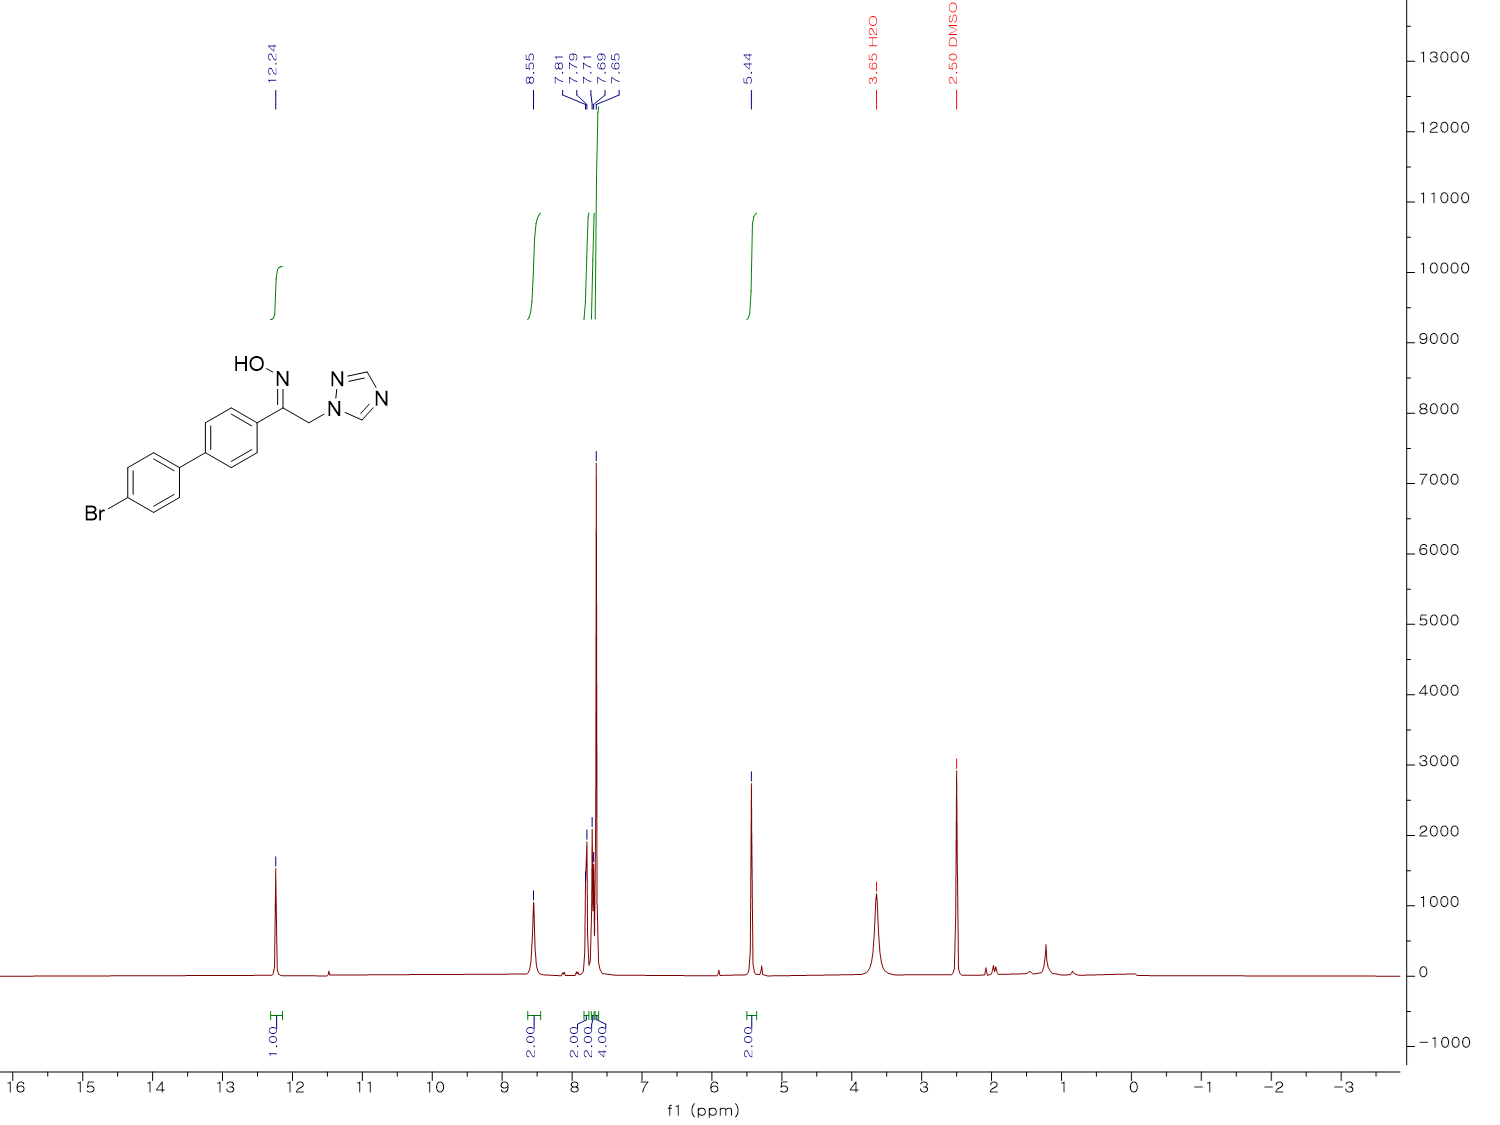


1H NMR spectrum (400 MHz, DMSO-*d6*) of **KH01**


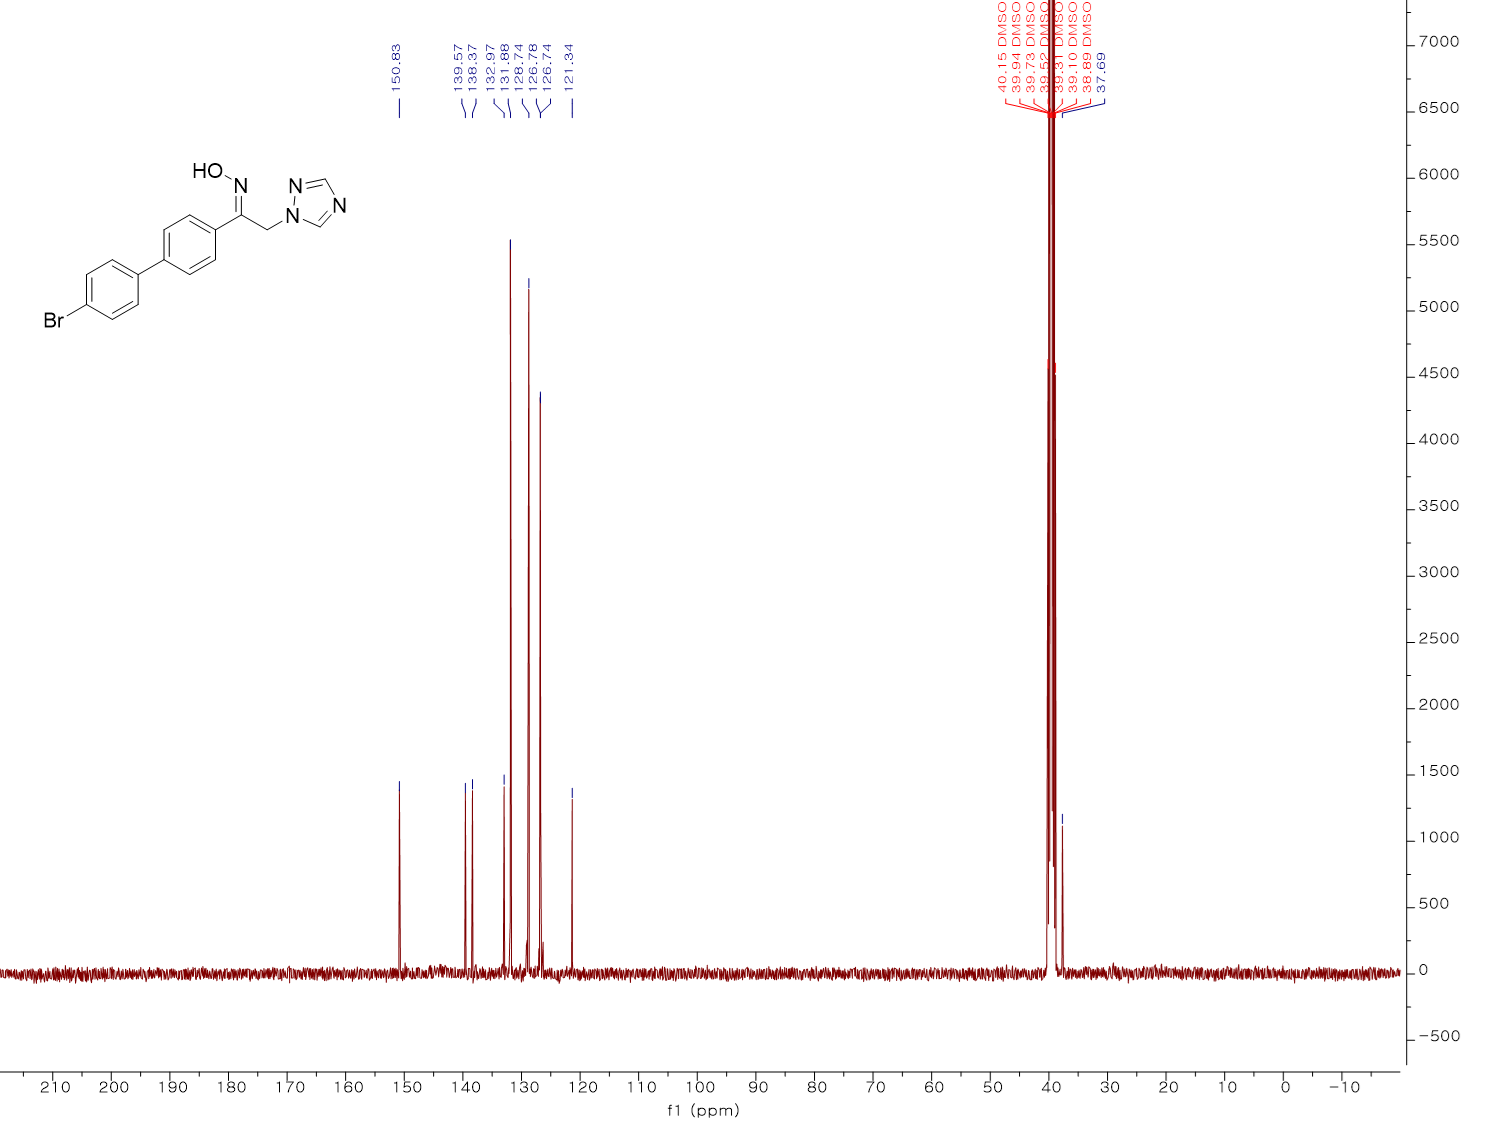


13C NMR spectrum (100 MHz, DMSO-*d6*) of **KH01**


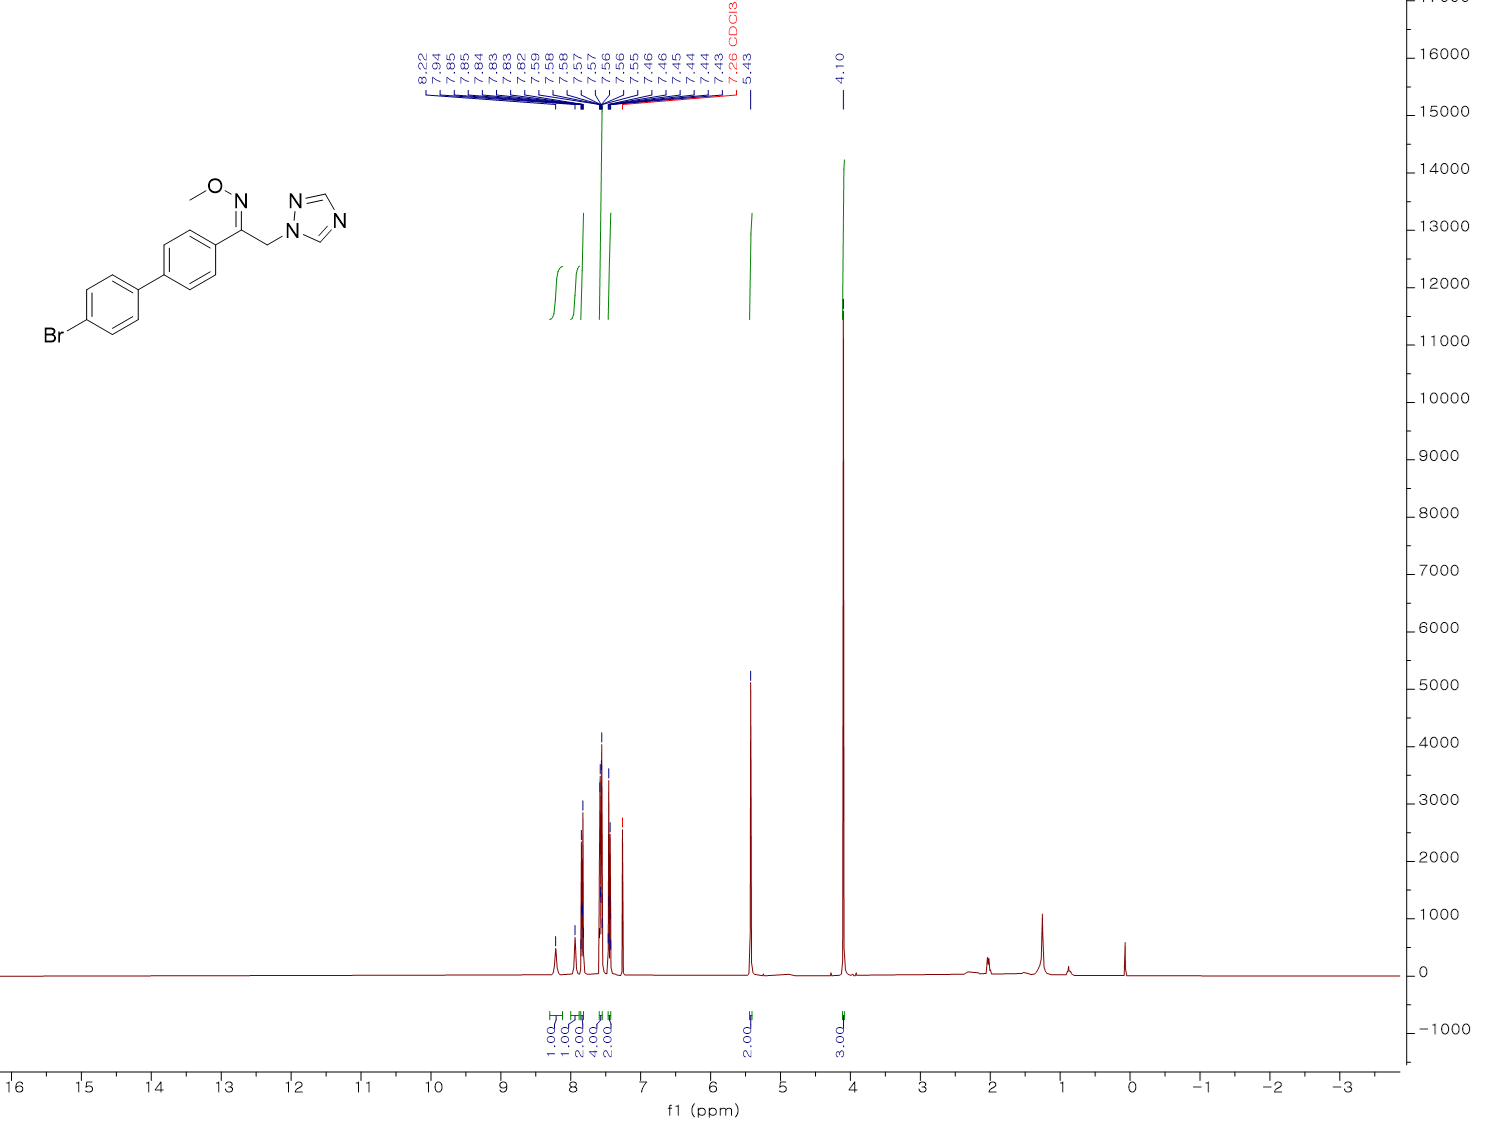


1H NMR spectrum (400 MHz, CDCl3) of **KH02**


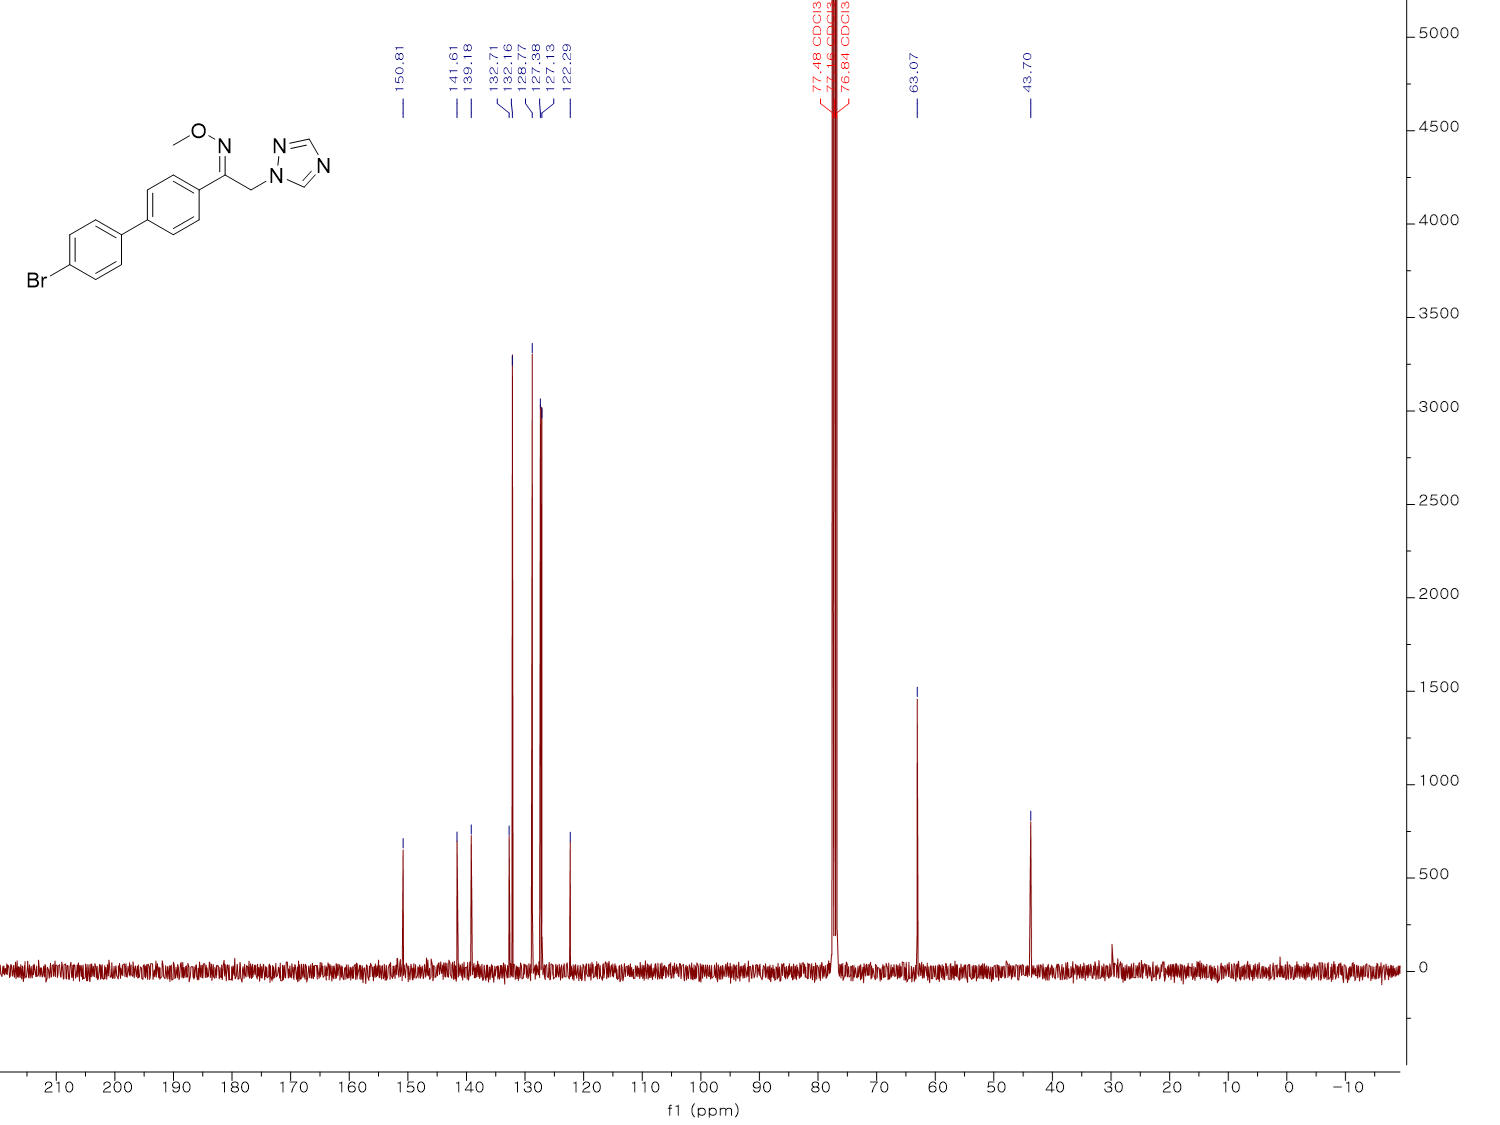


13C NMR spectrum (100 MHz, CDCl3) of **KH02**


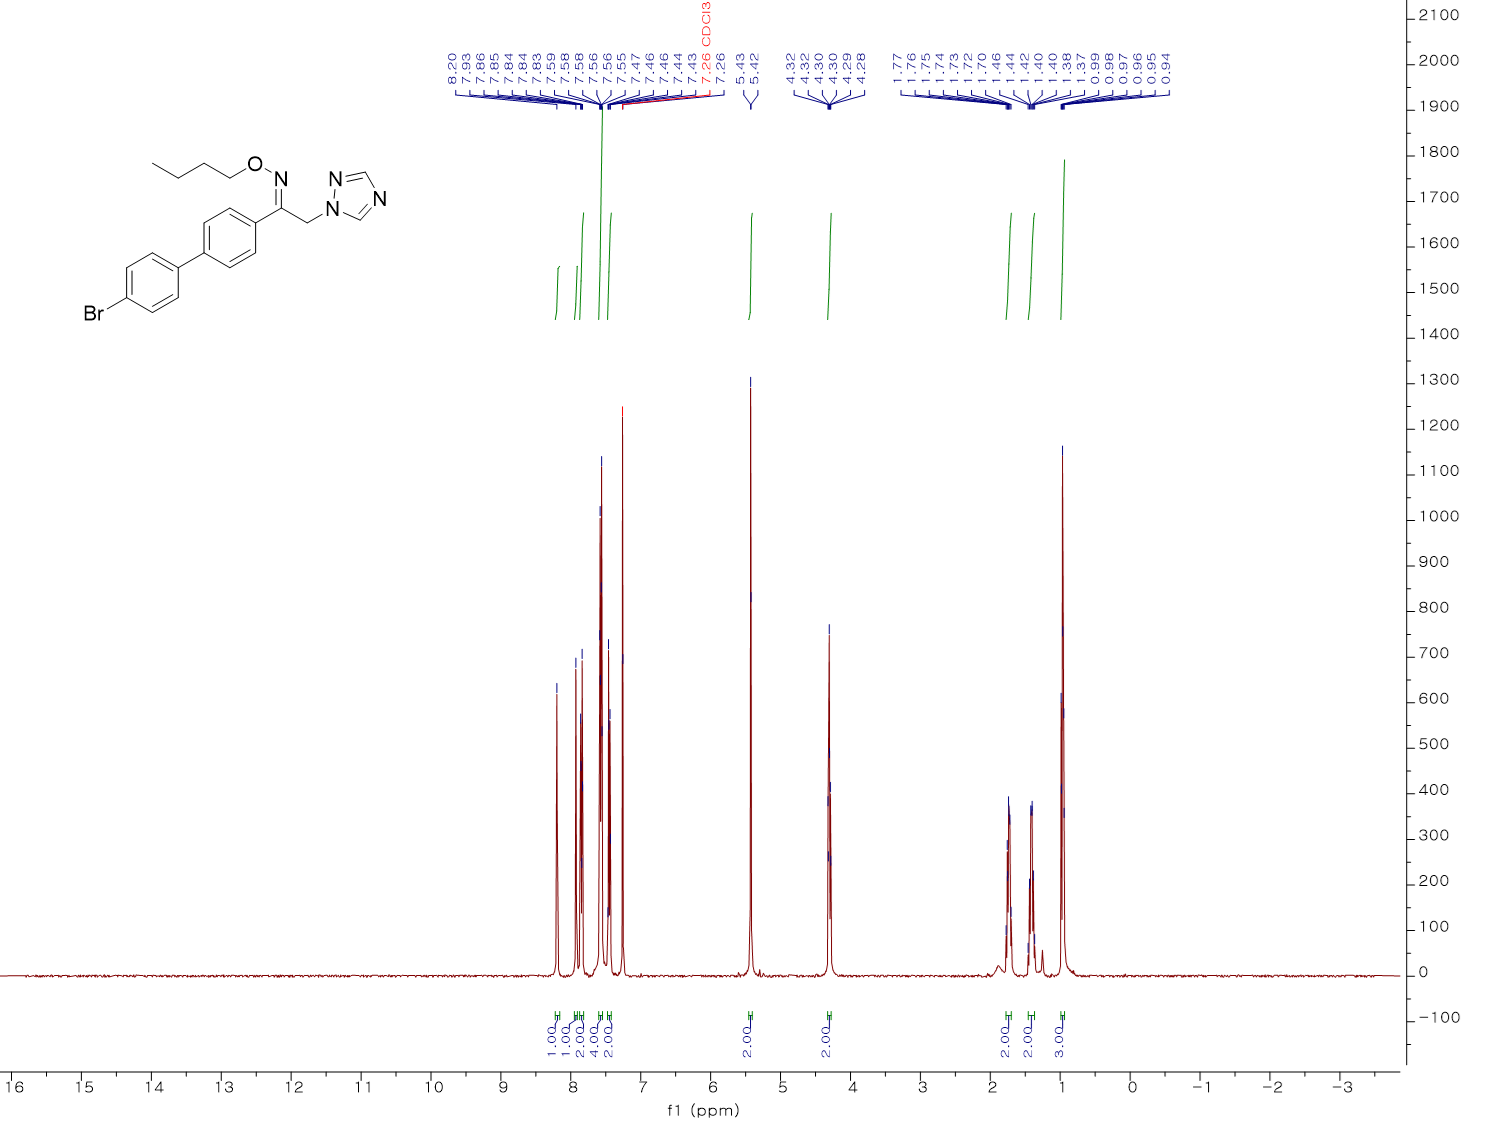


1H NMR spectrum (400 MHz, CDCl3) of **KH03**


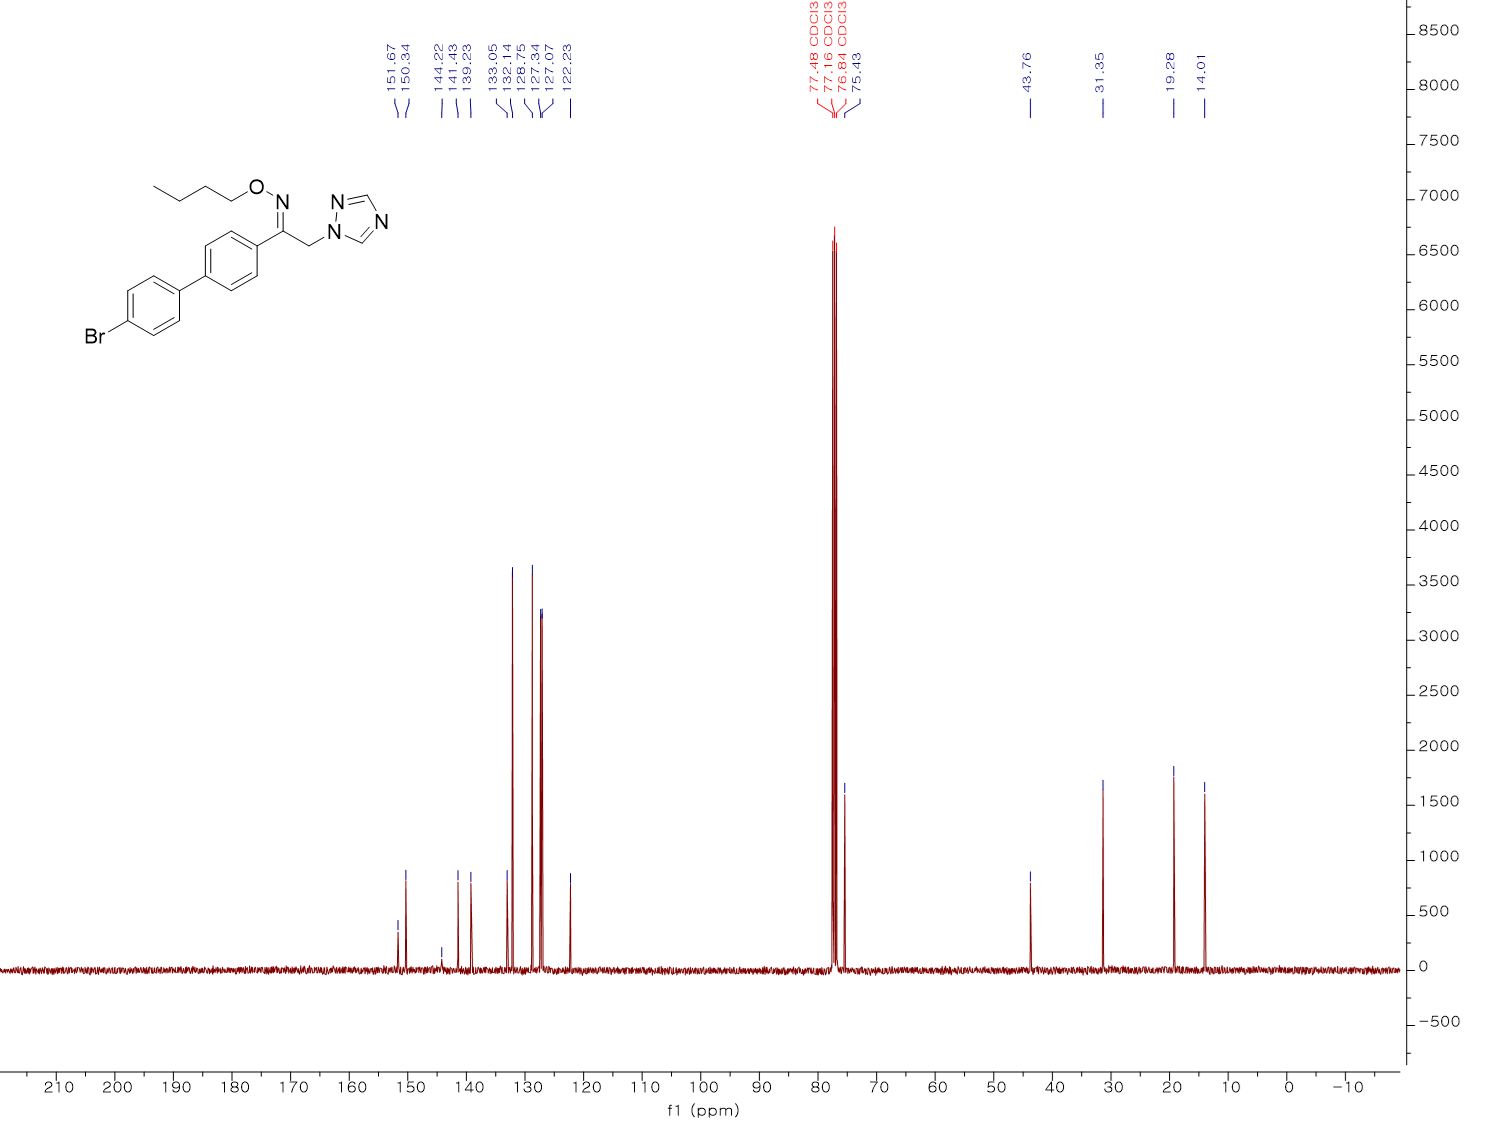


13C NMR spectrum (100 MHz, CDCl3) of **KH03**


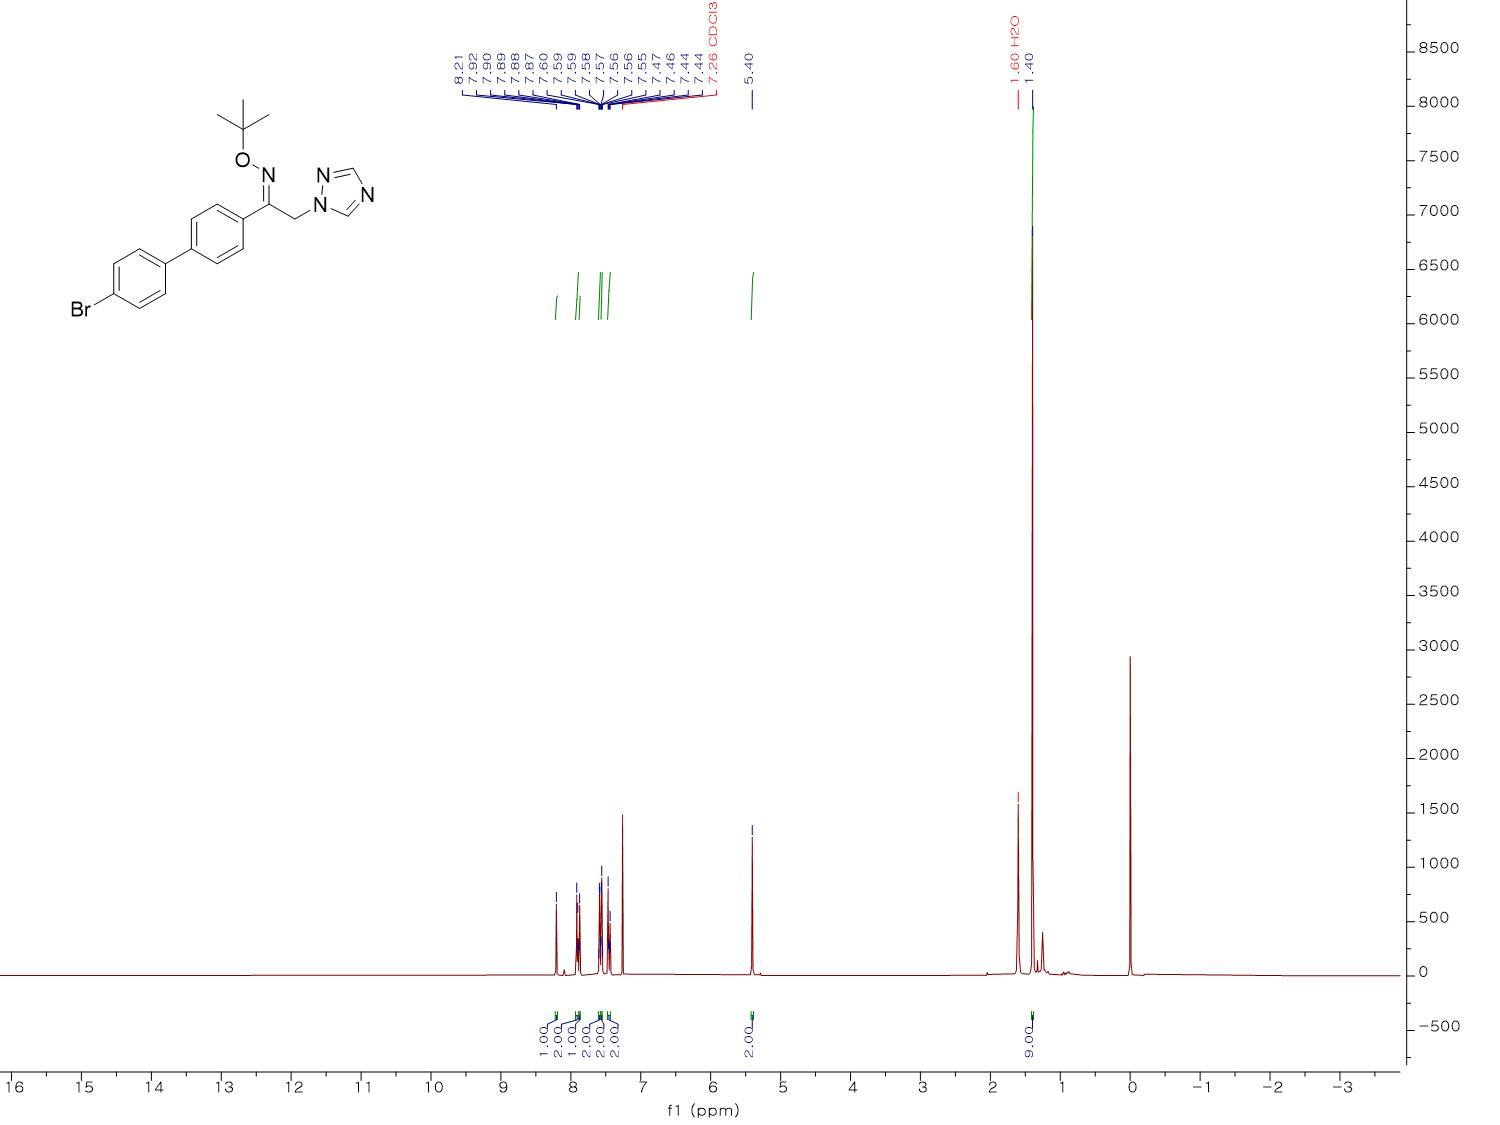


1H NMR spectrum (400 MHz, CDCl3) of **KH04**

**
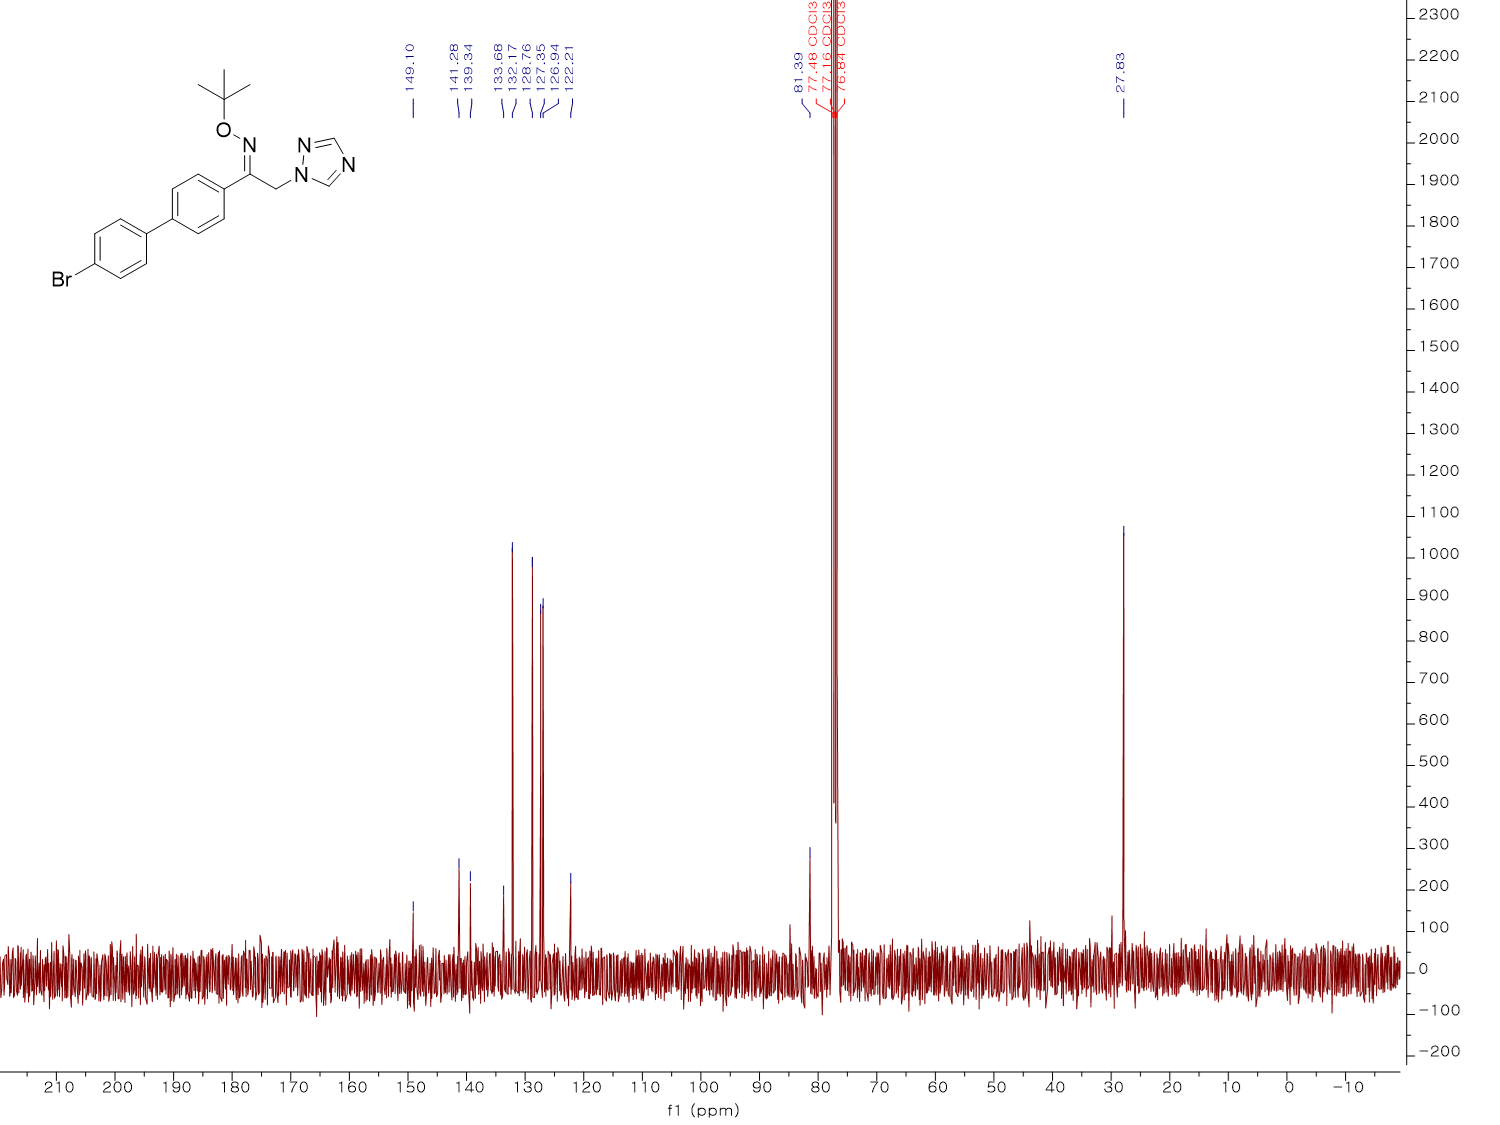
**

13C NMR spectrum (100 MHz, CDCl3) of **KH04**


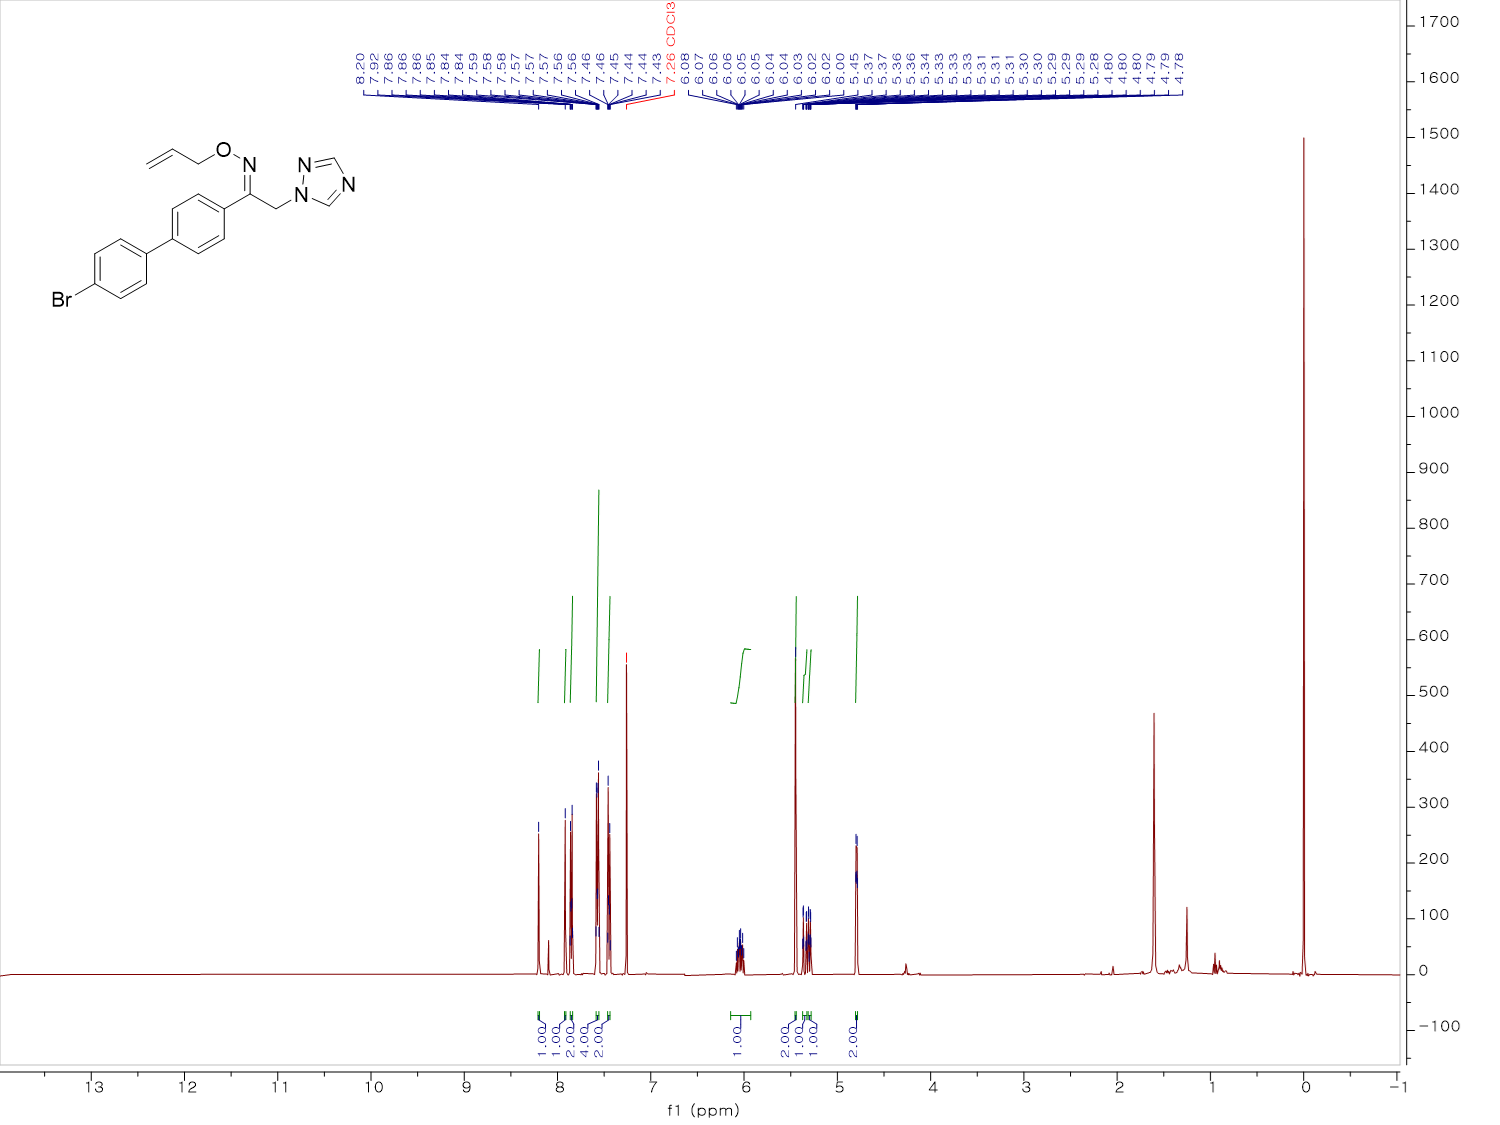


1H NMR spectrum (500 MHz, CDCl3) of **KH05**

**
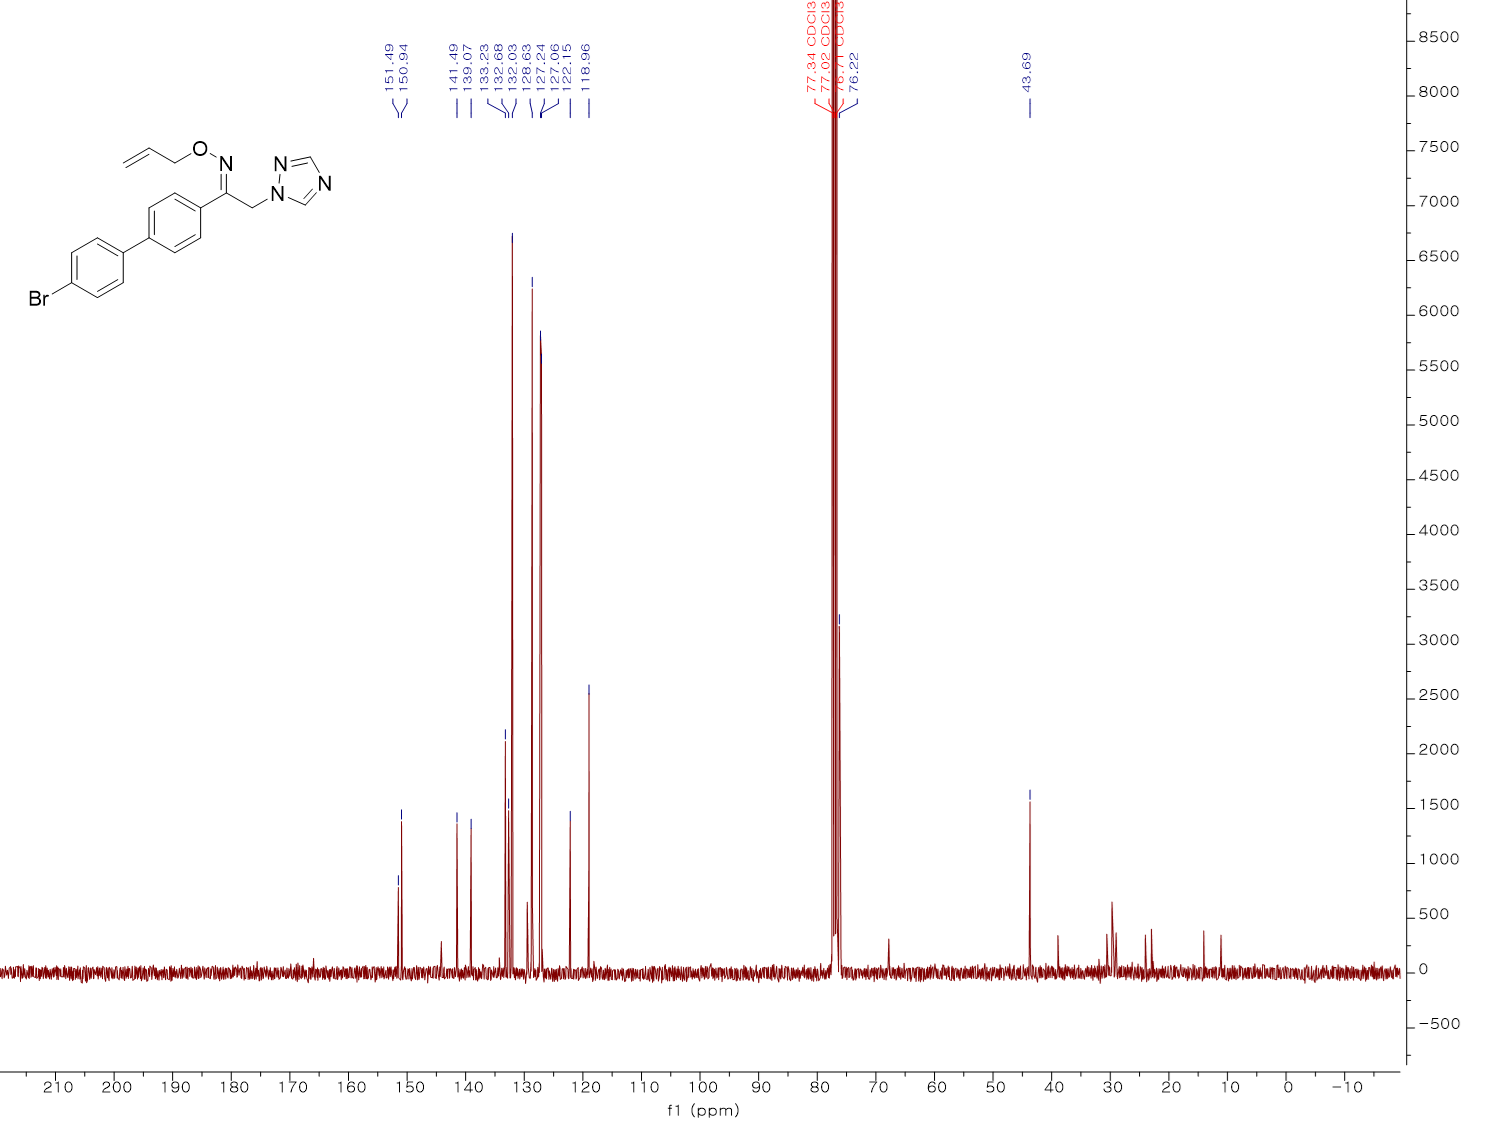
**

13C NMR spectrum (100 MHz, CDCl3) of **KH05**


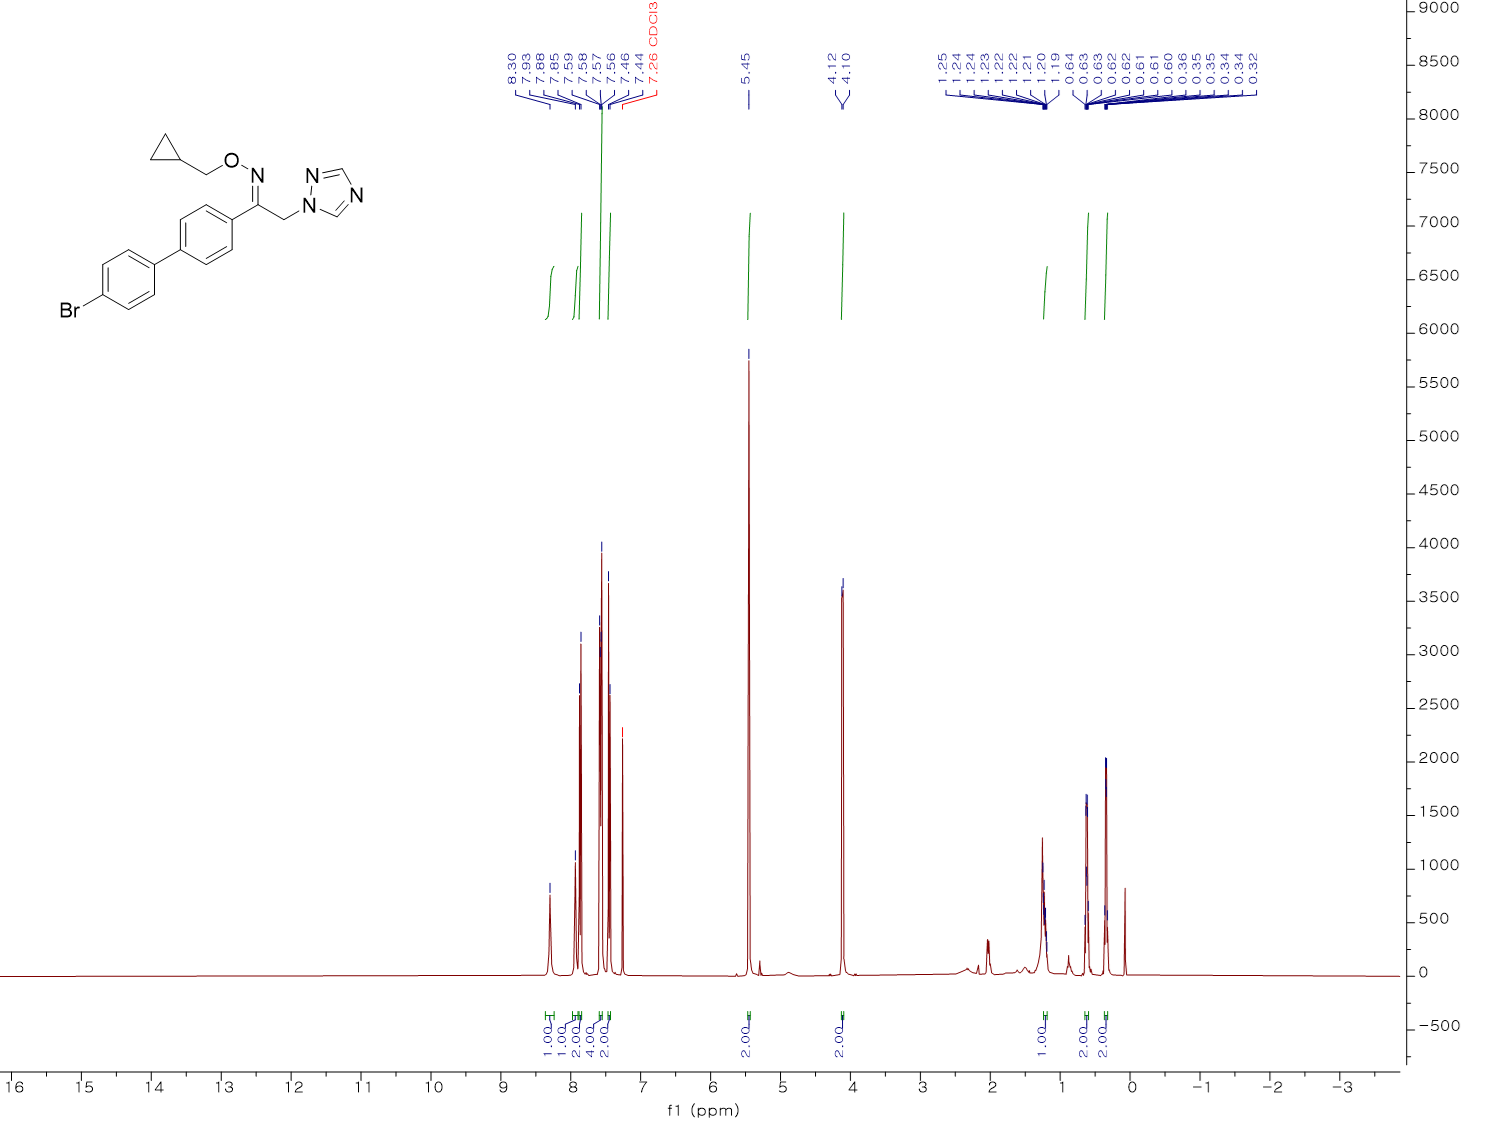


1H NMR spectrum (400 MHz, CDCl3) of **KH06**

**
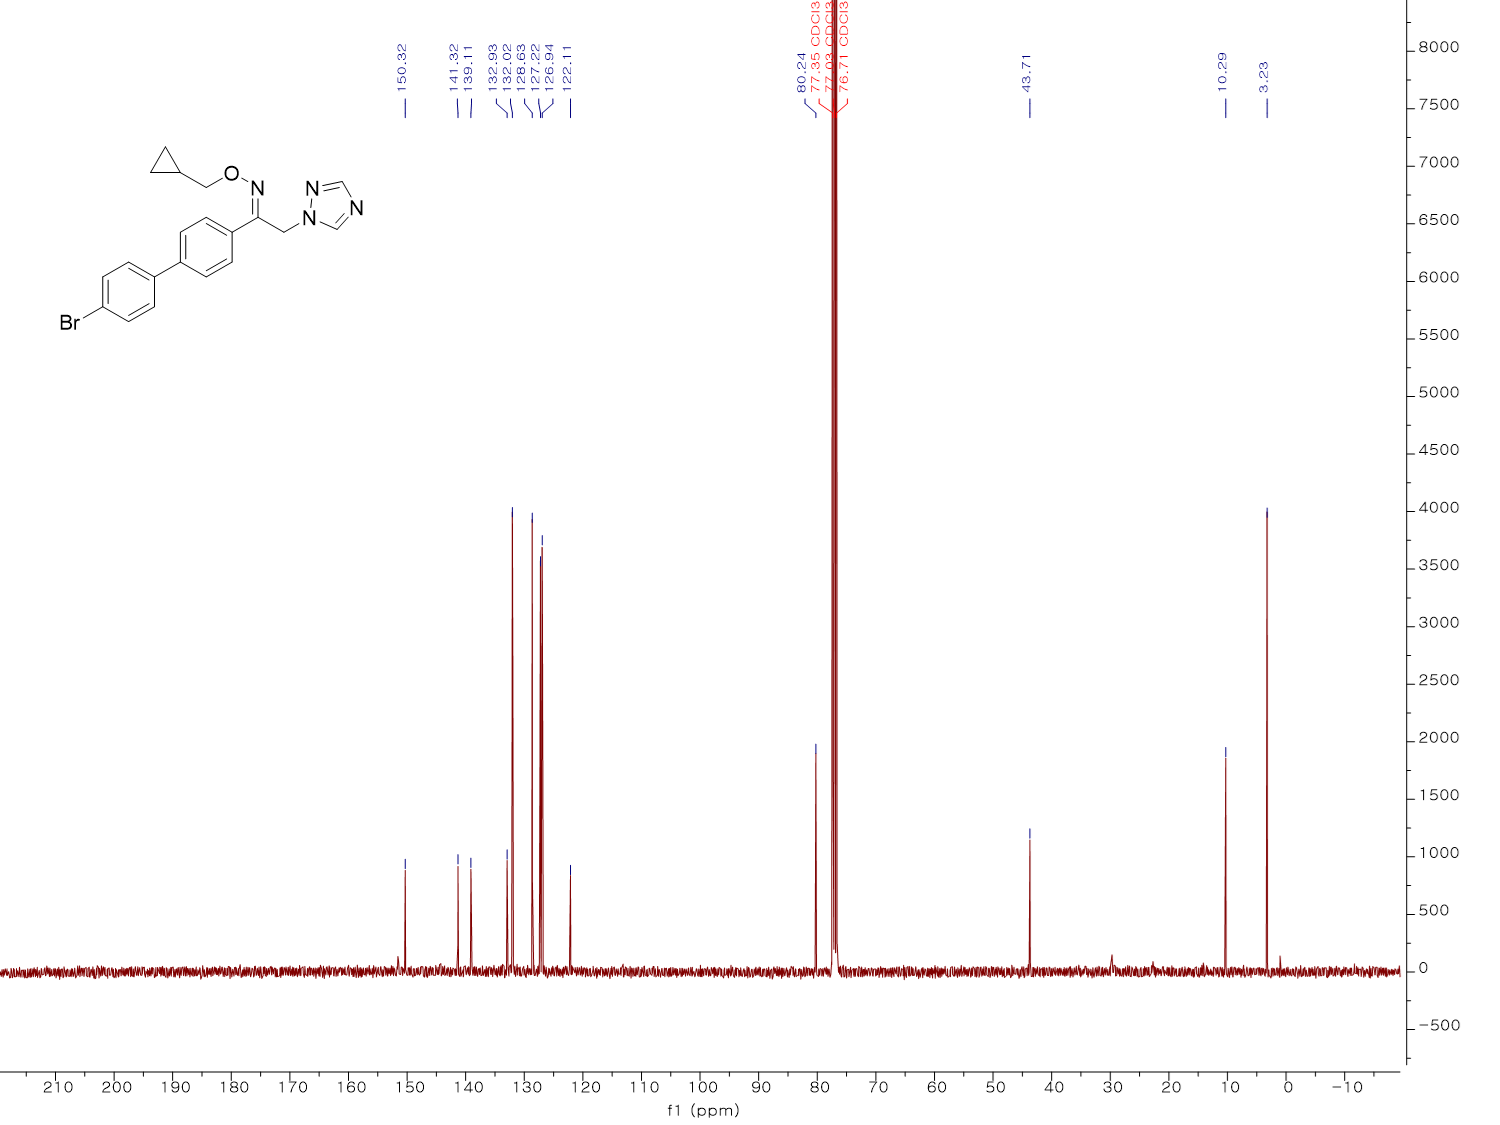
**

13C NMR spectrum (100 MHz, CDCl3) of **KH06**


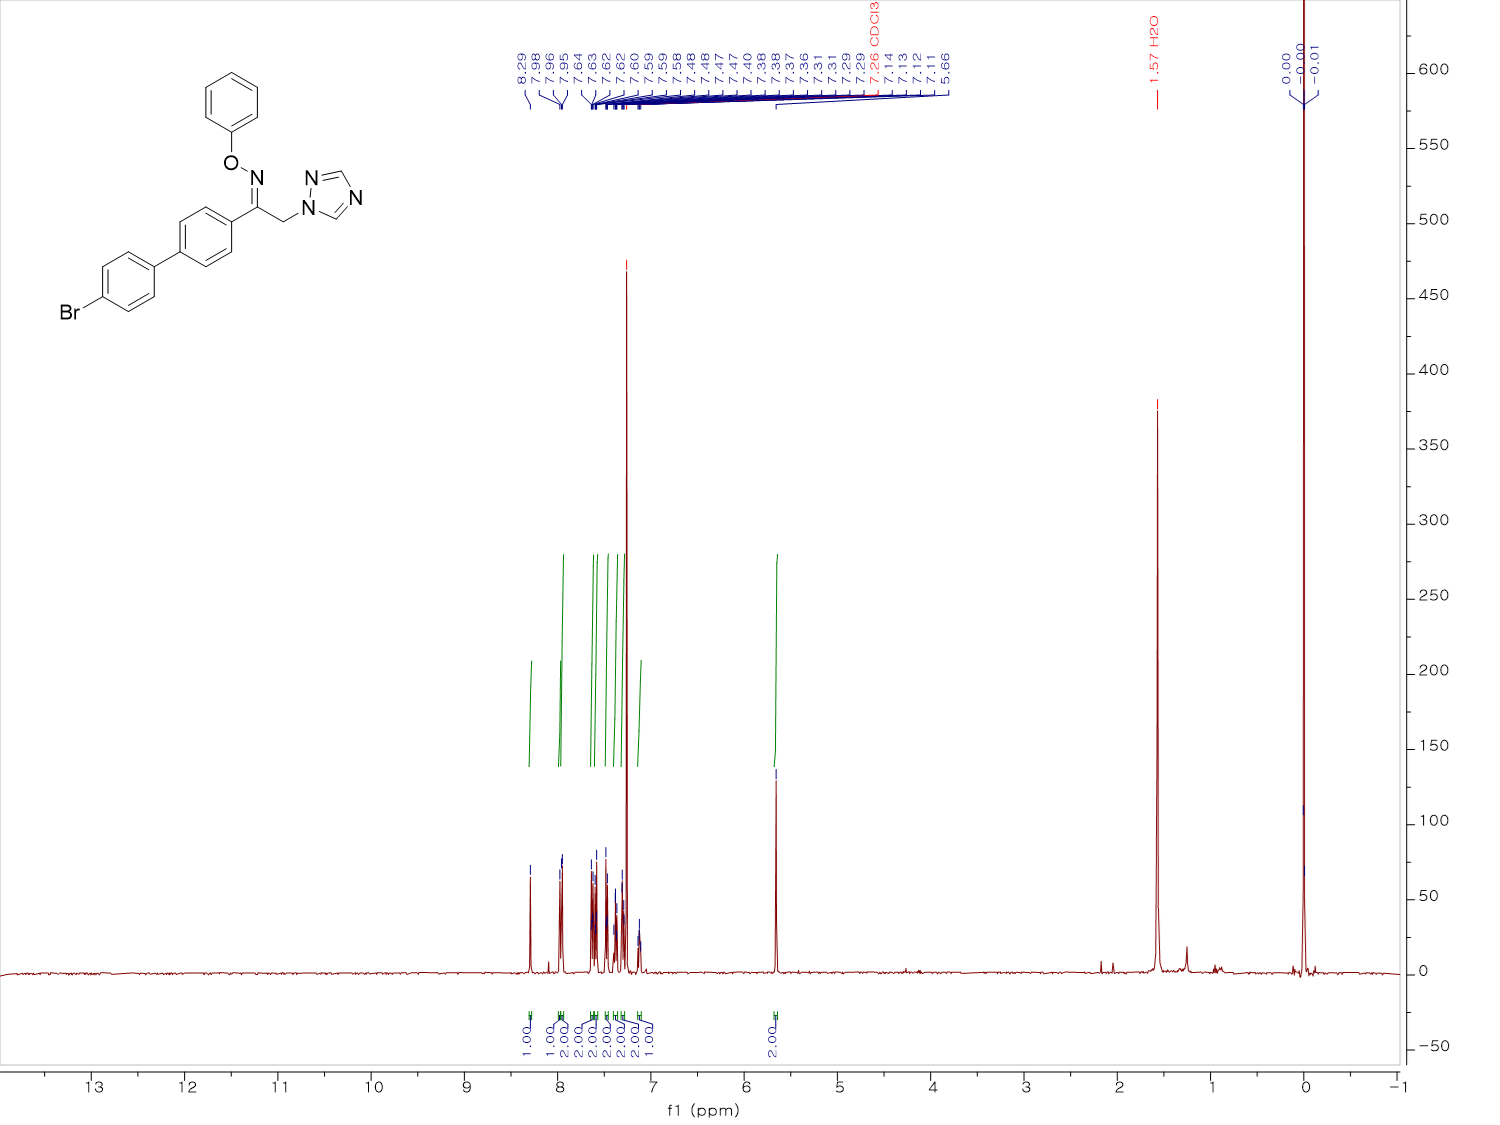


1H NMR spectrum (500 MHz, CDCl3) of **KH07**

**
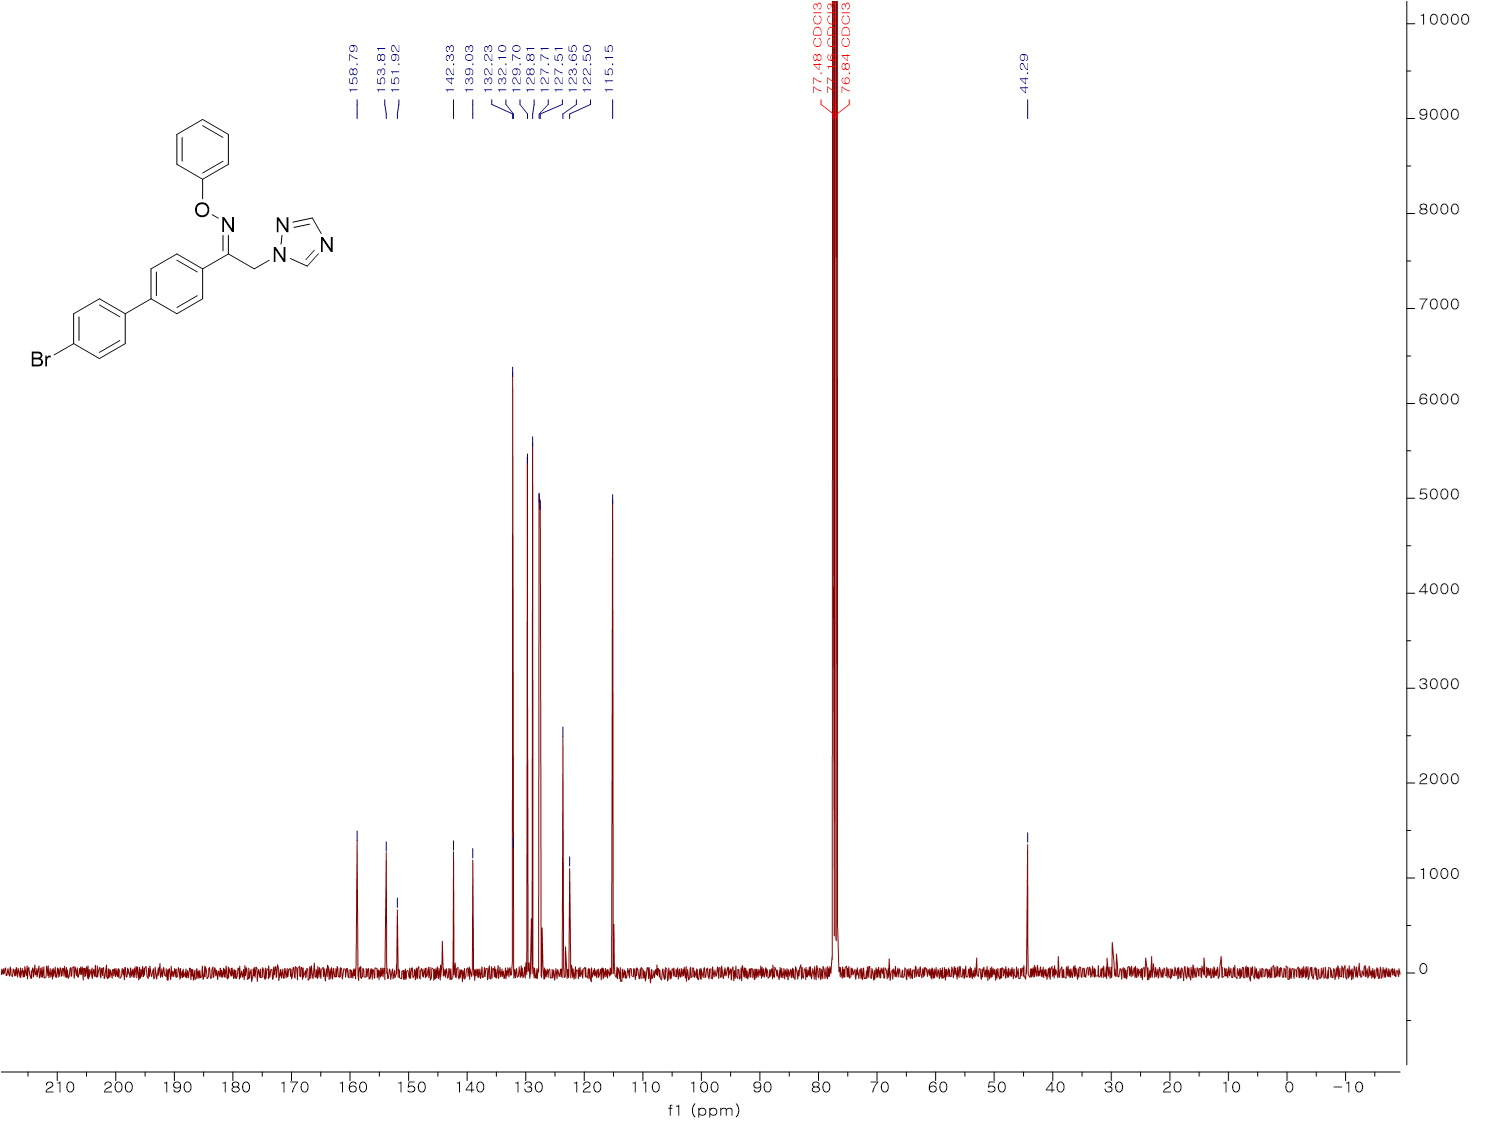
**

13C NMR spectrum (100 MHz, CDCl3) of **KH07**


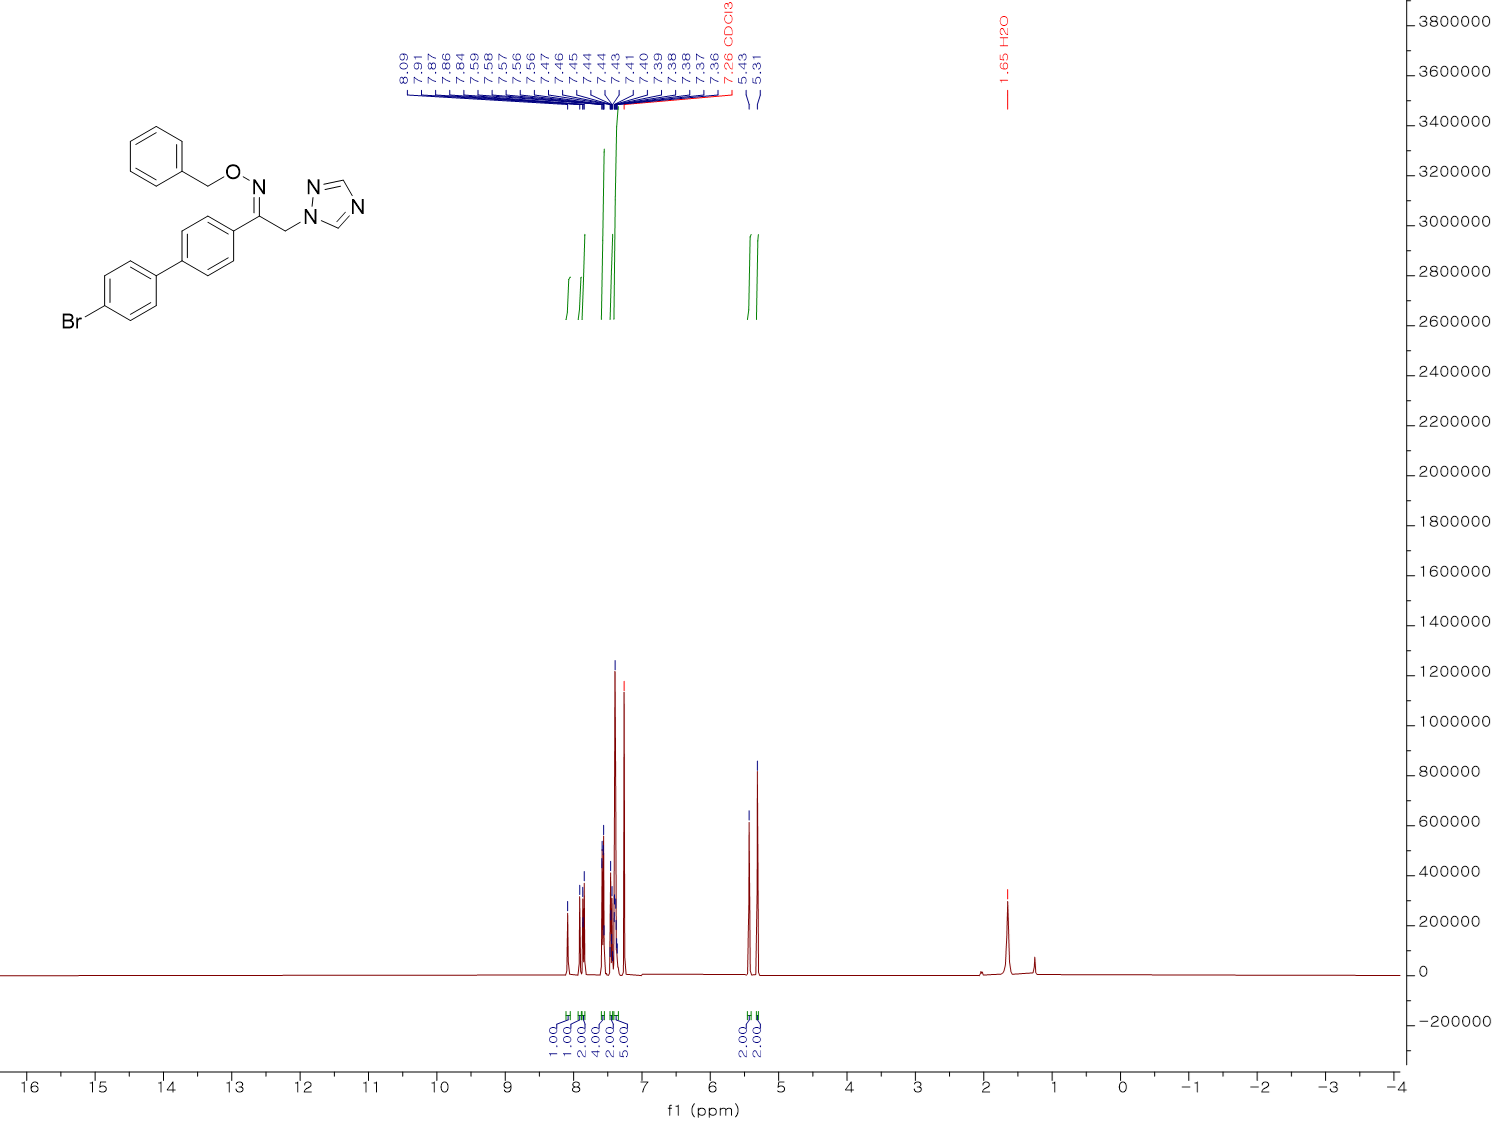


1H NMR spectrum (400 MHz, CDCl3) of **KH08**


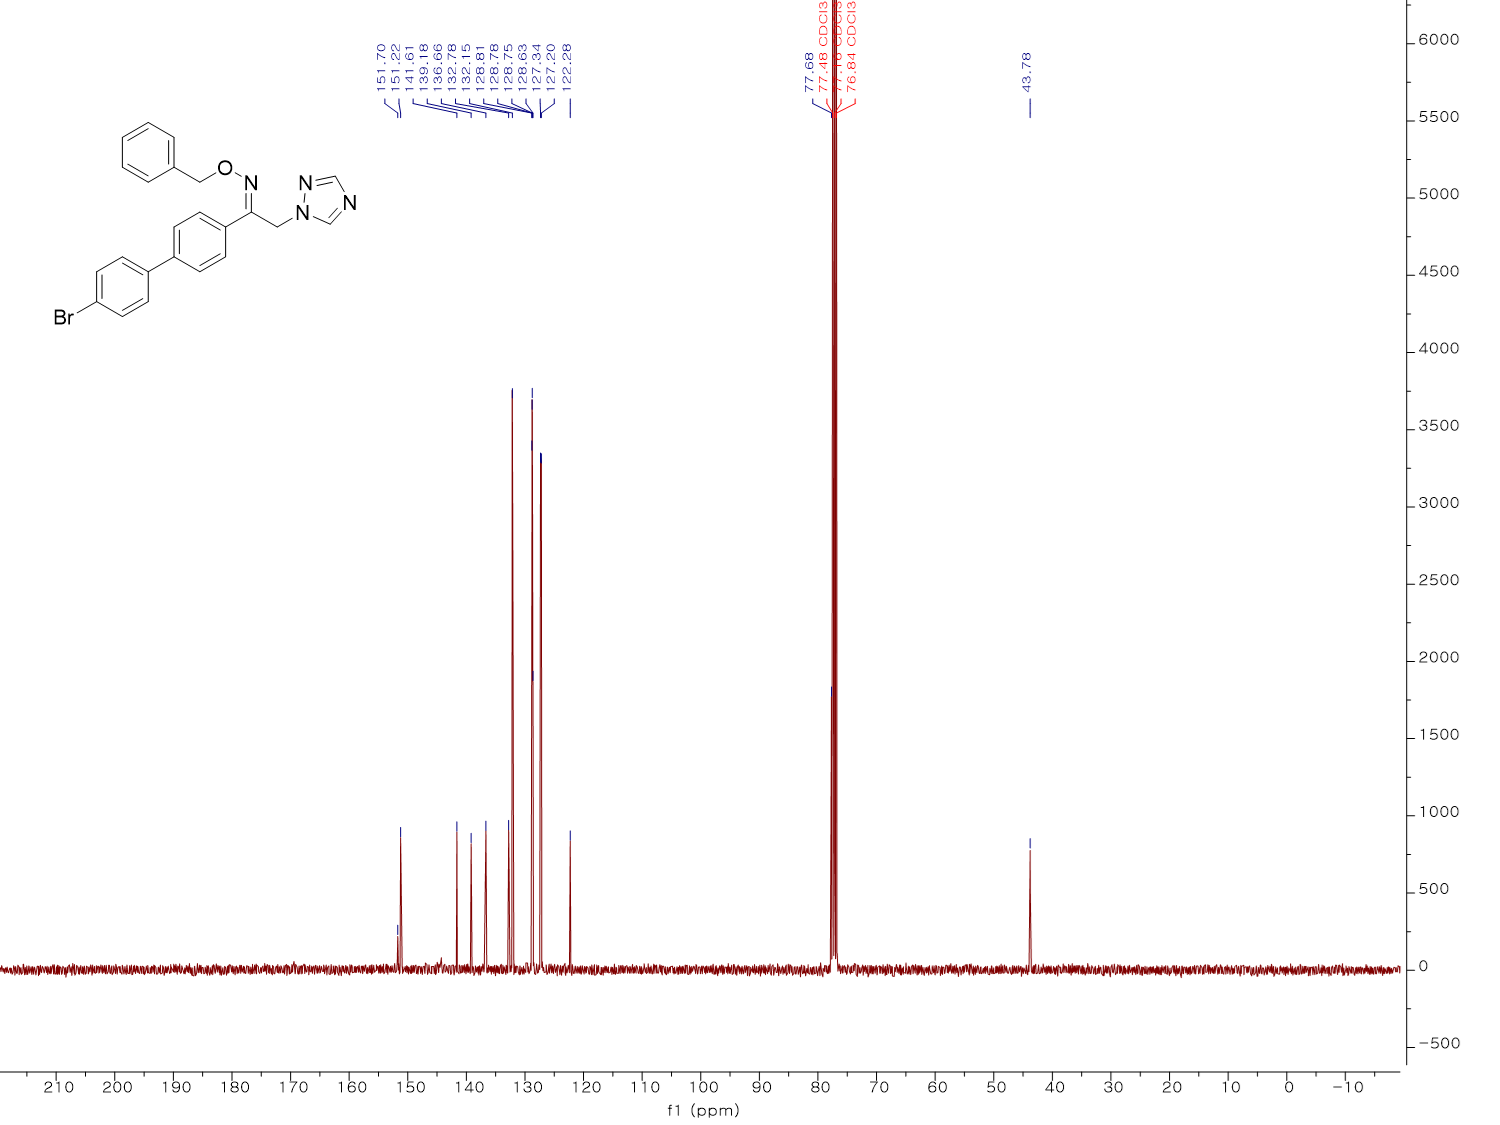


13C NMR spectrum (100 MHz, CDCl3) of **KH08**


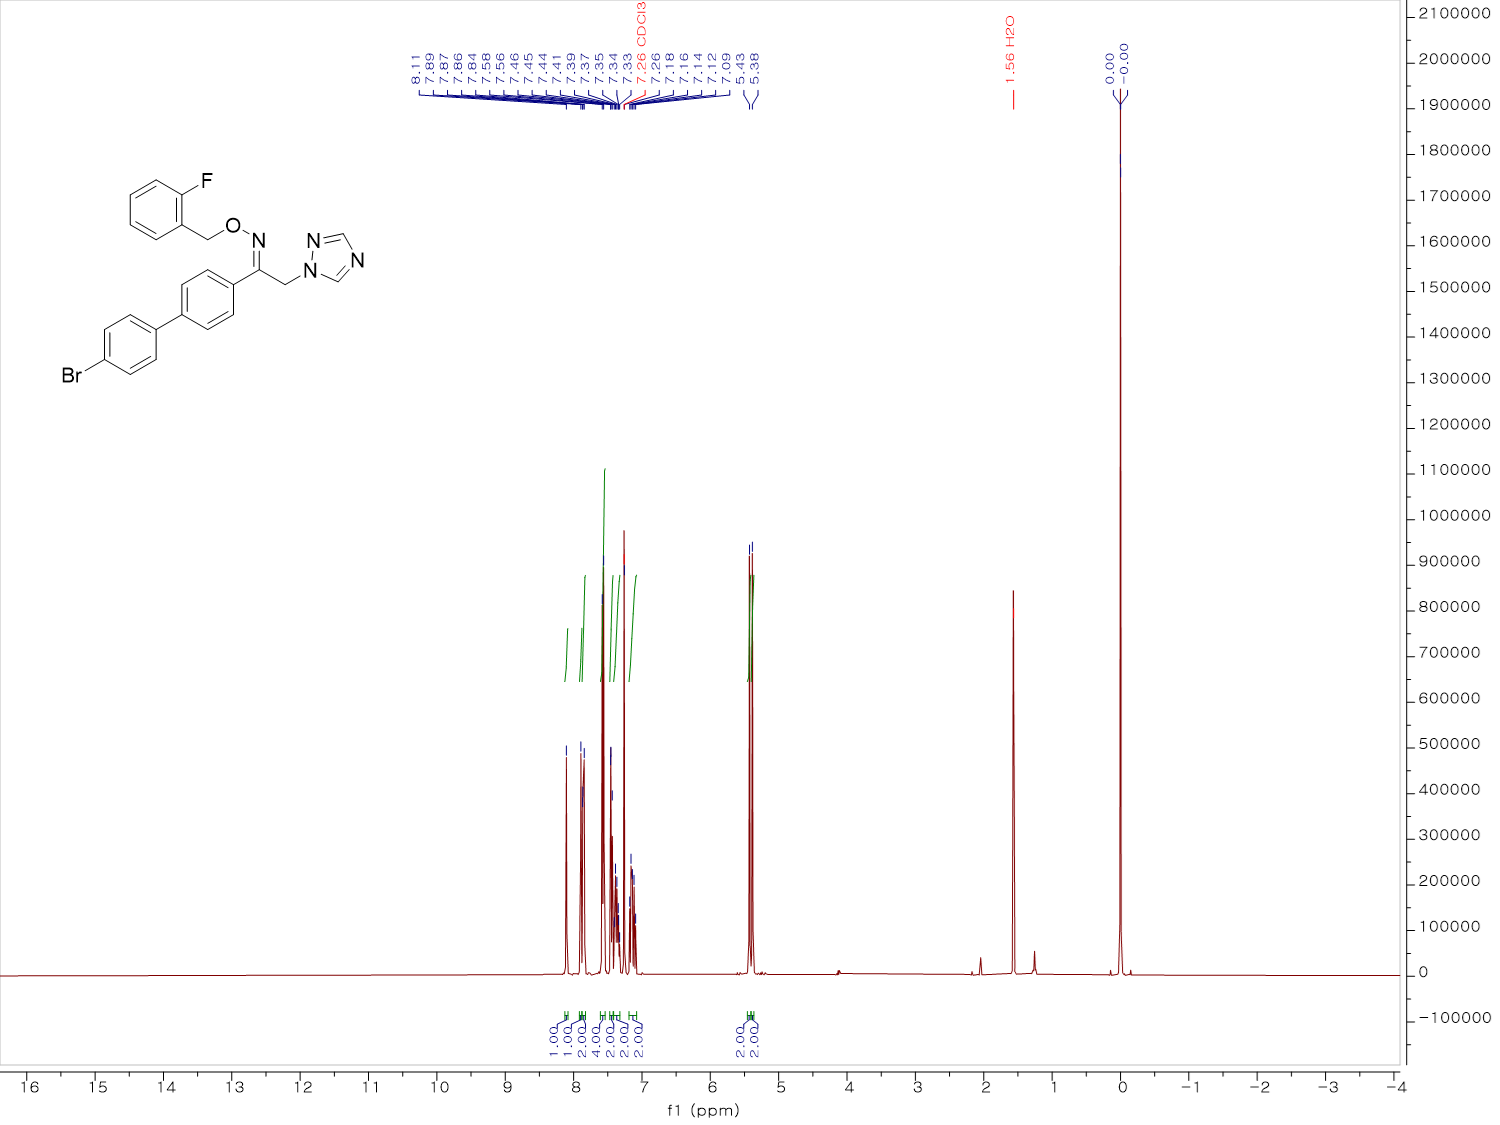


1H NMR spectrum (400 MHz, CDCl3) of **KH09**


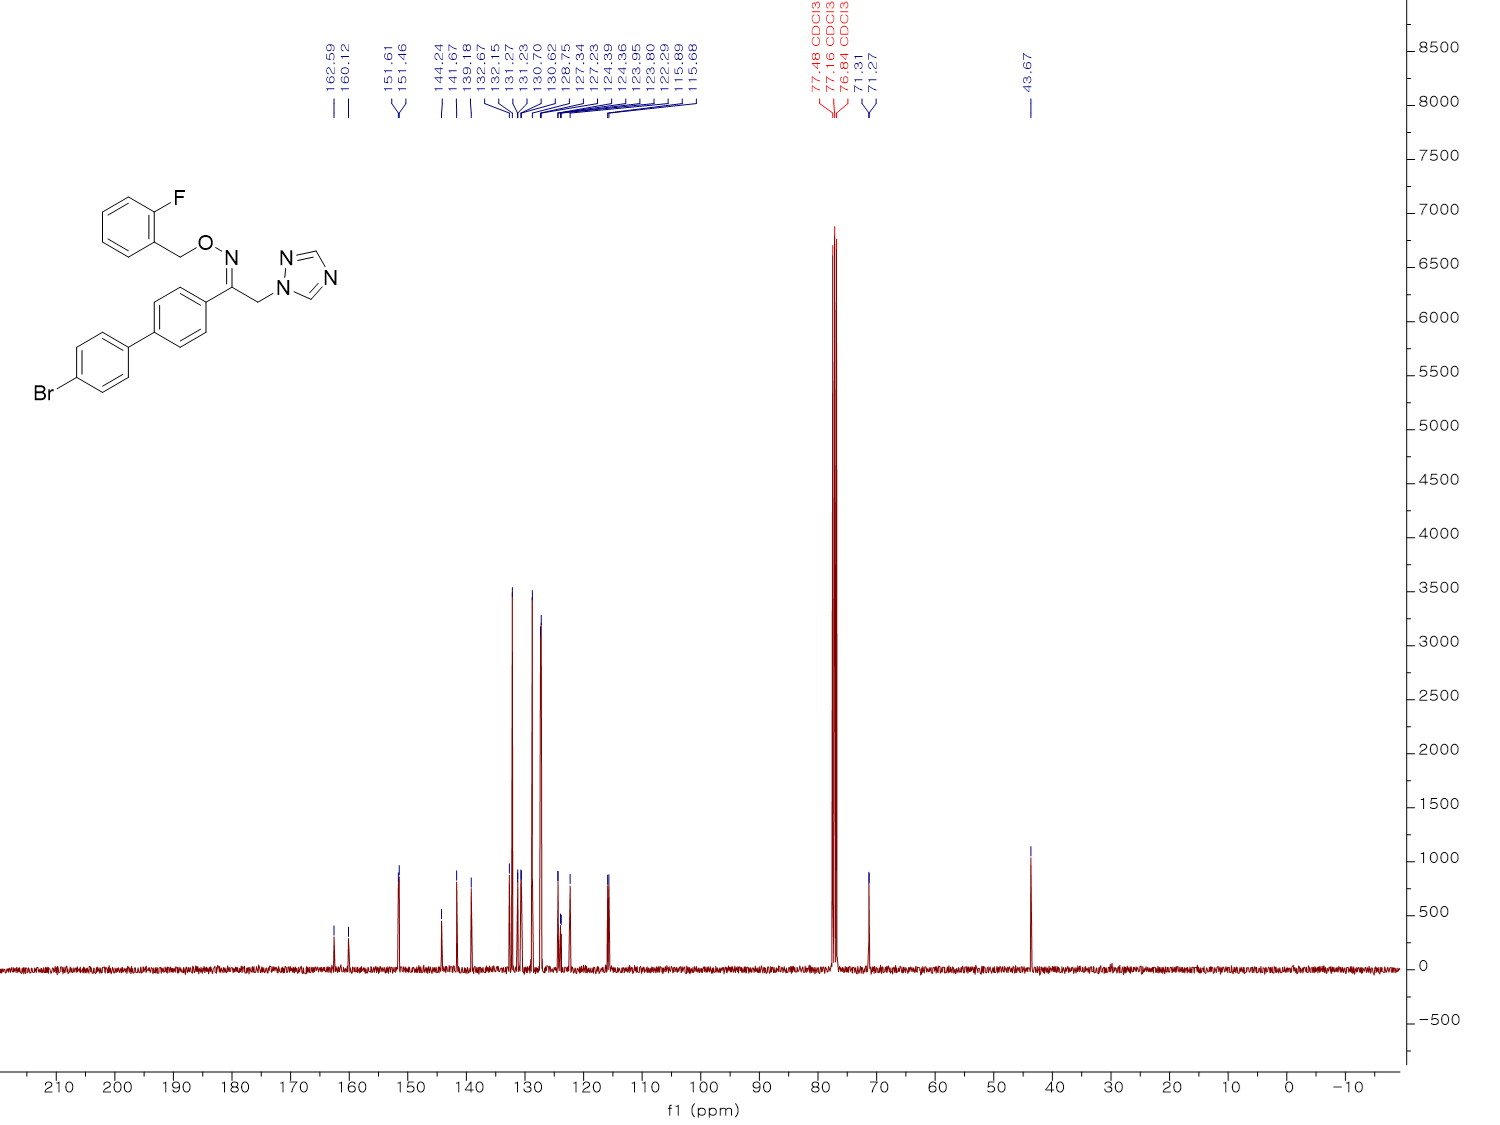


13C NMR spectrum (100 MHz, CDCl3) of **KH09**


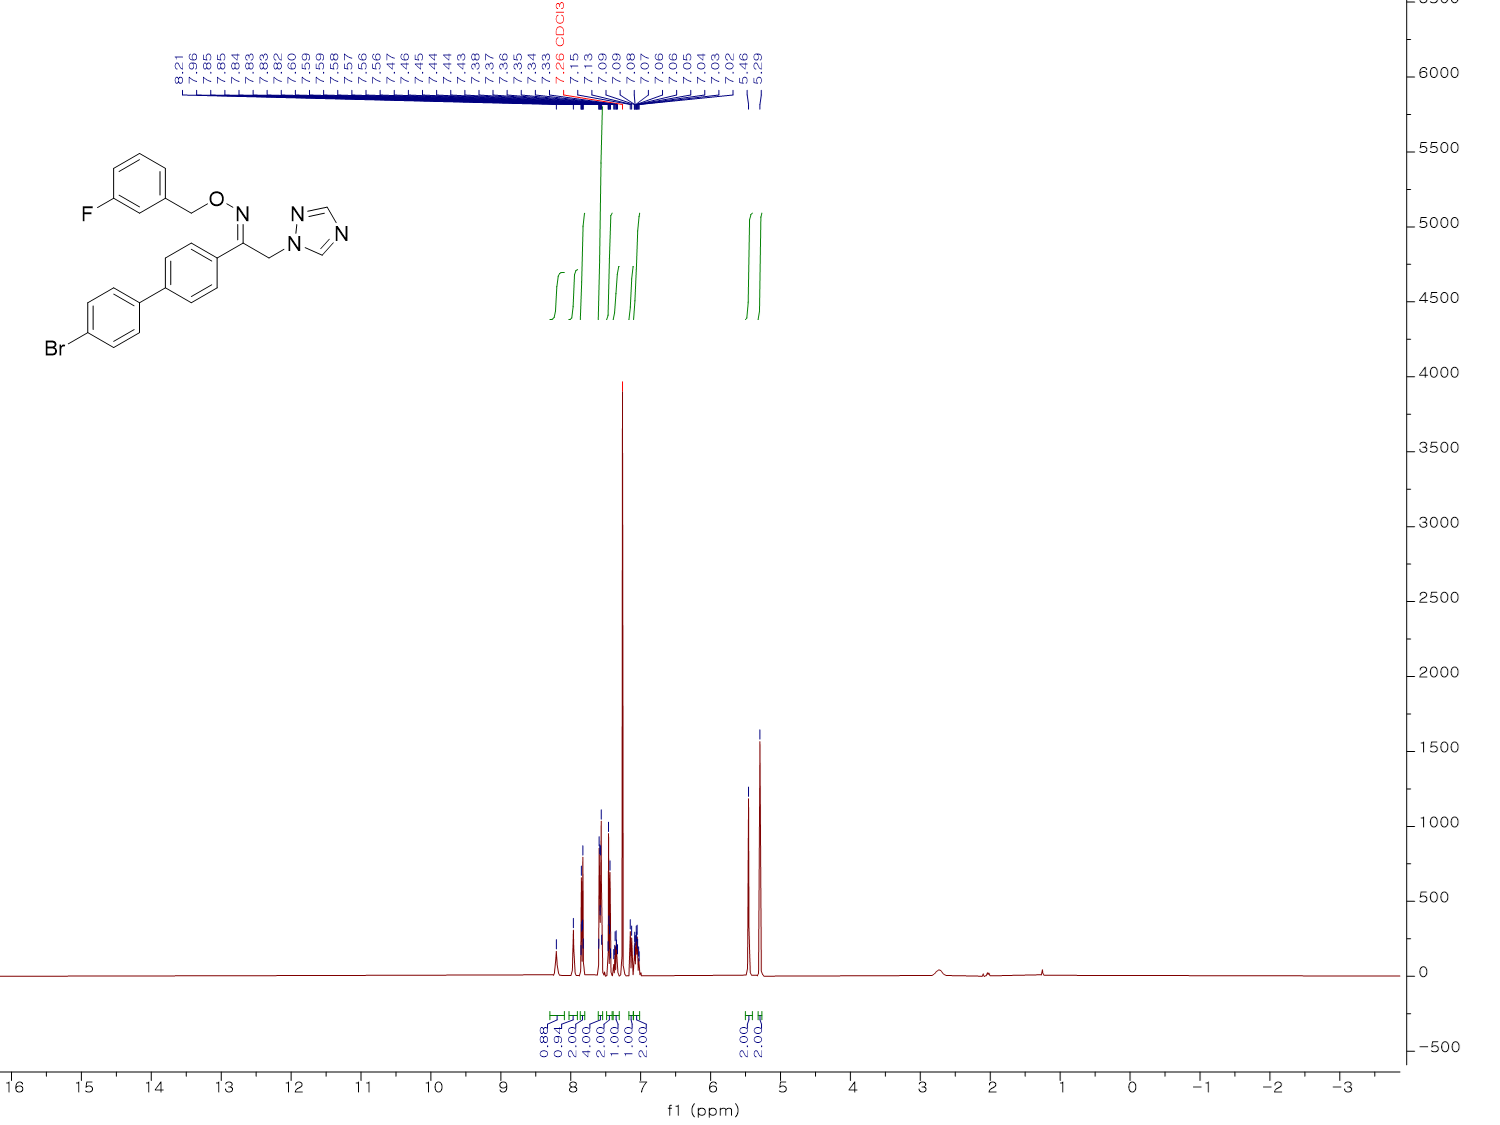


1H NMR spectrum (400 MHz, CDCl3) of **KH10**


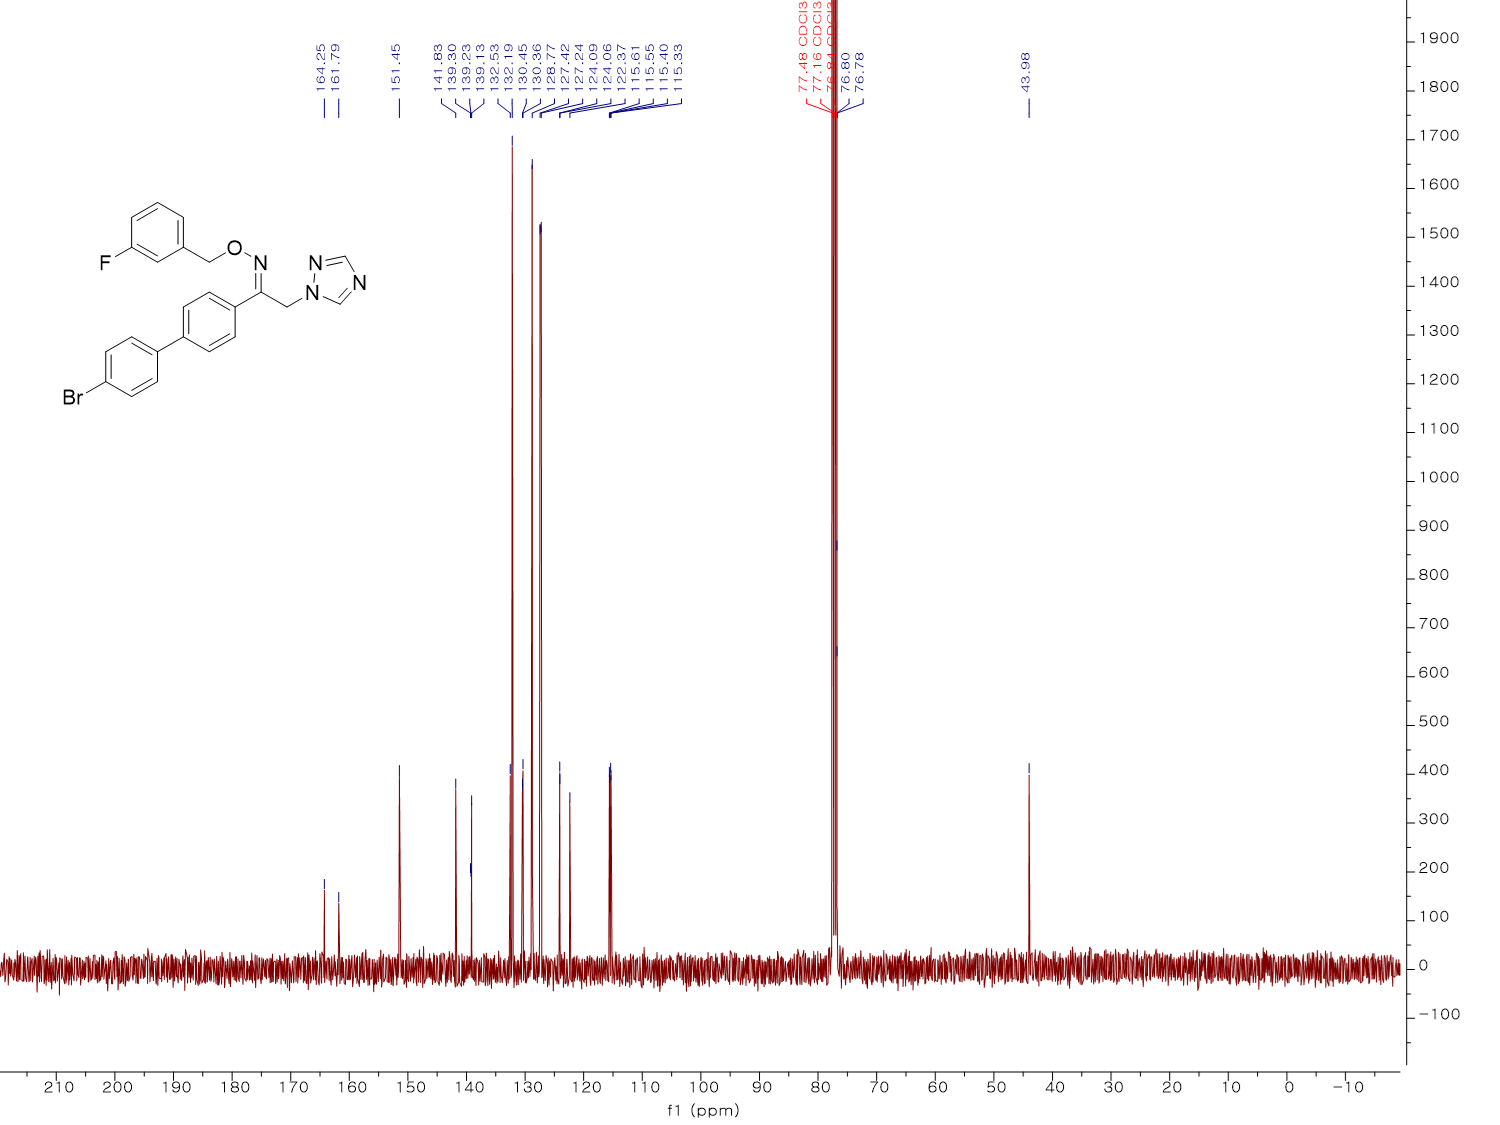


13C NMR spectrum (100 MHz, CDCl3) of **KH10**


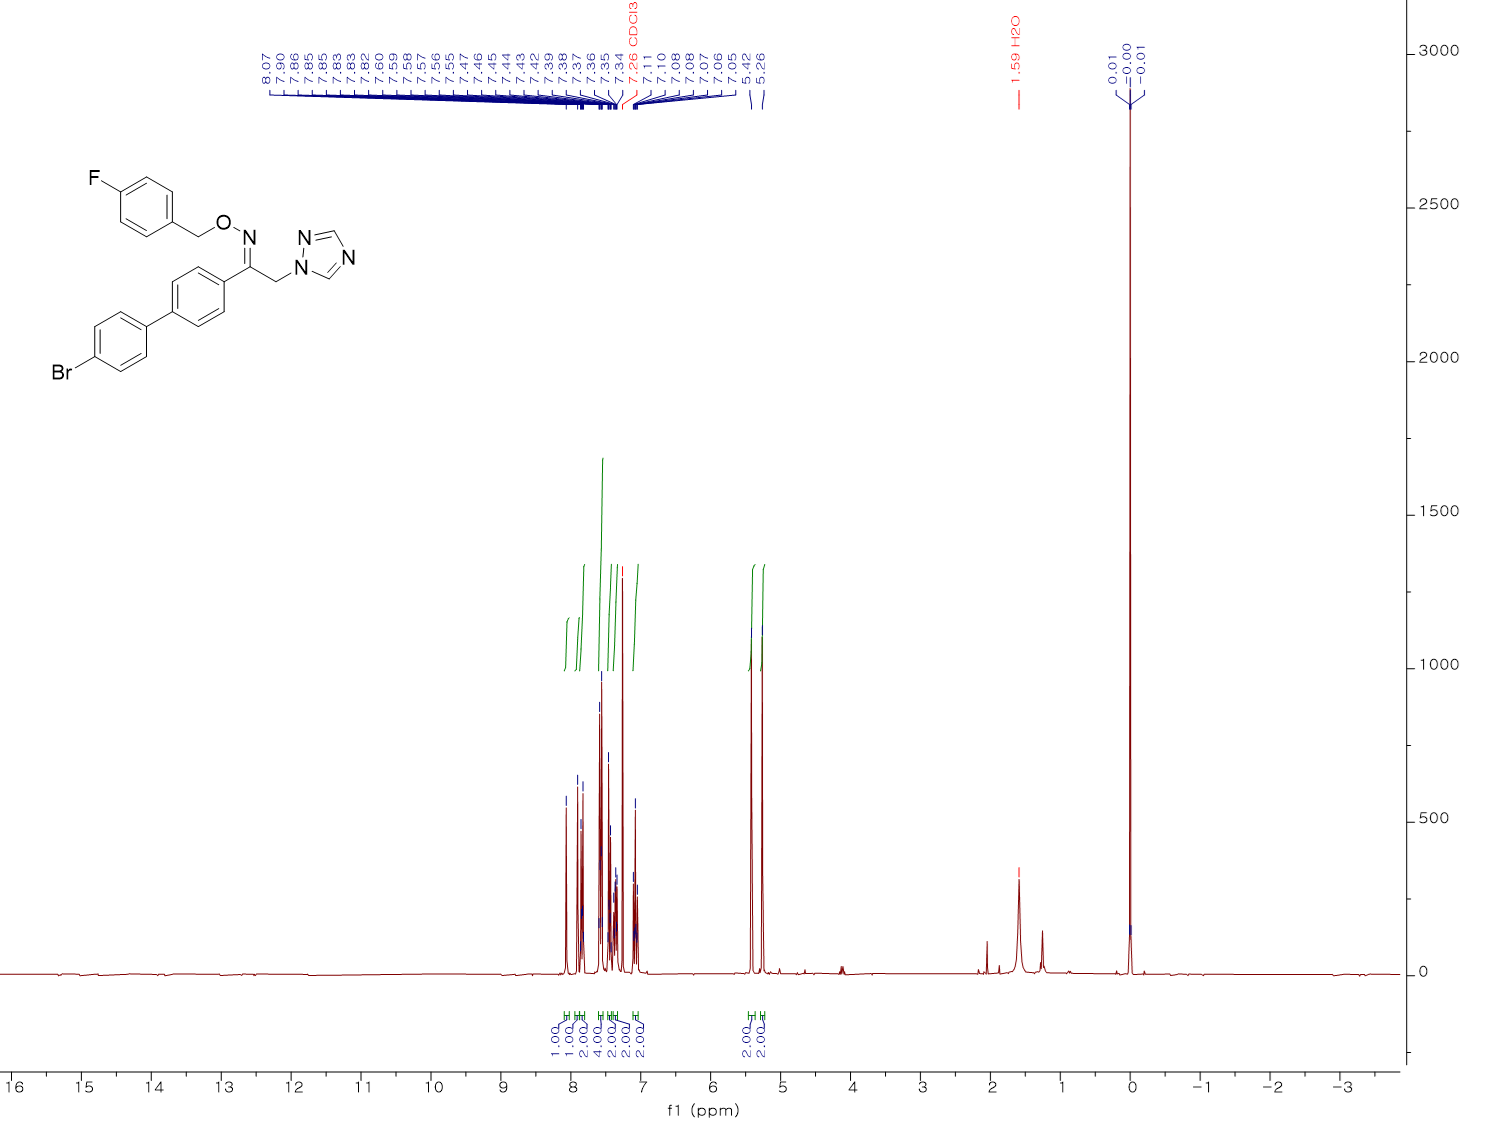


1H NMR spectrum (300 MHz, CDCl3) of **KH11**


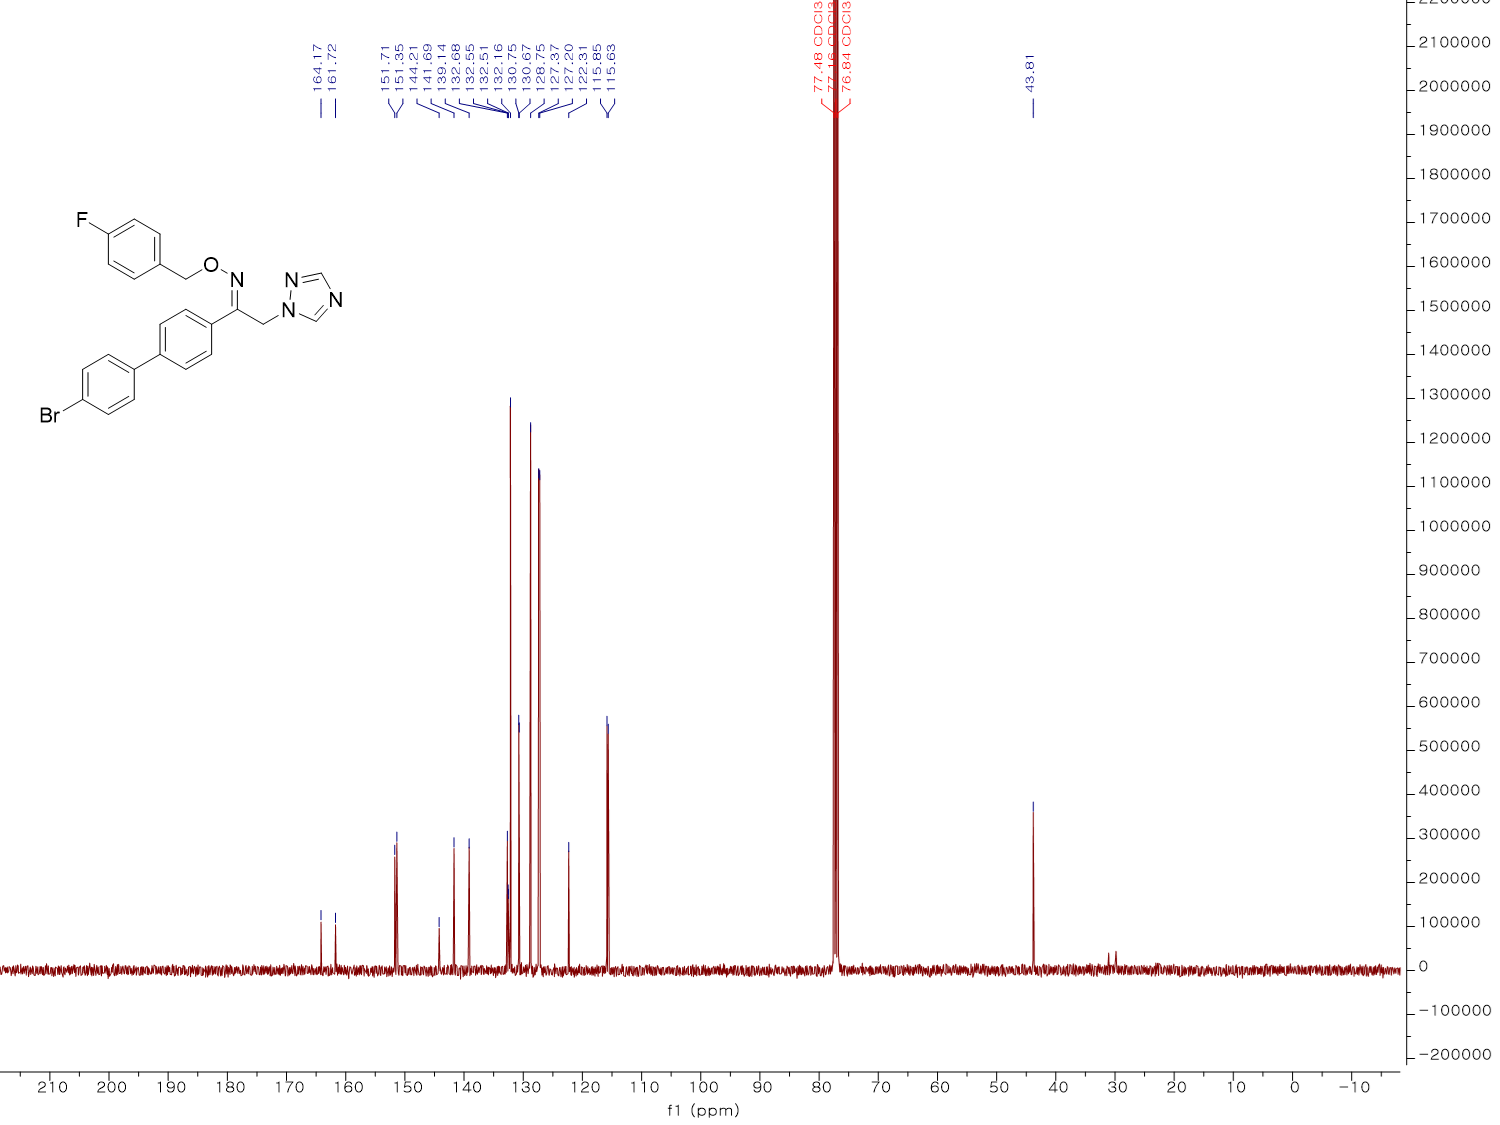


13C NMR spectrum (100 MHz, CDCl3) of **KH11**


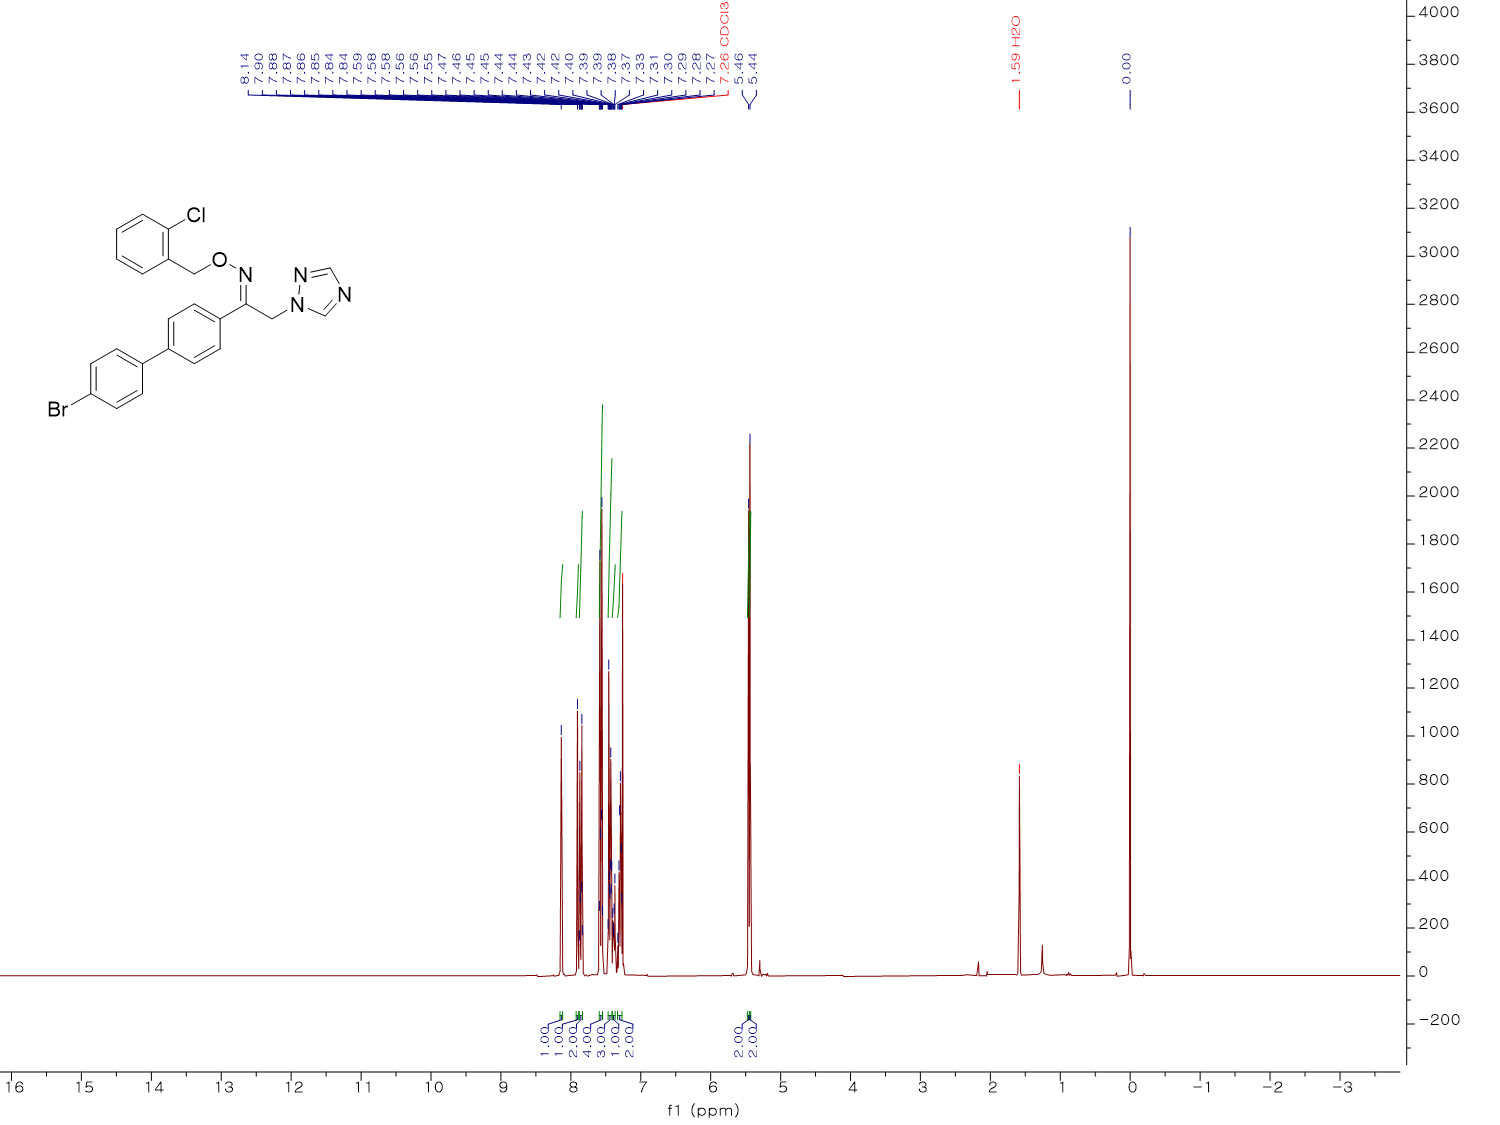


1H NMR spectrum (300 MHz, CDCl3) of **KH12**


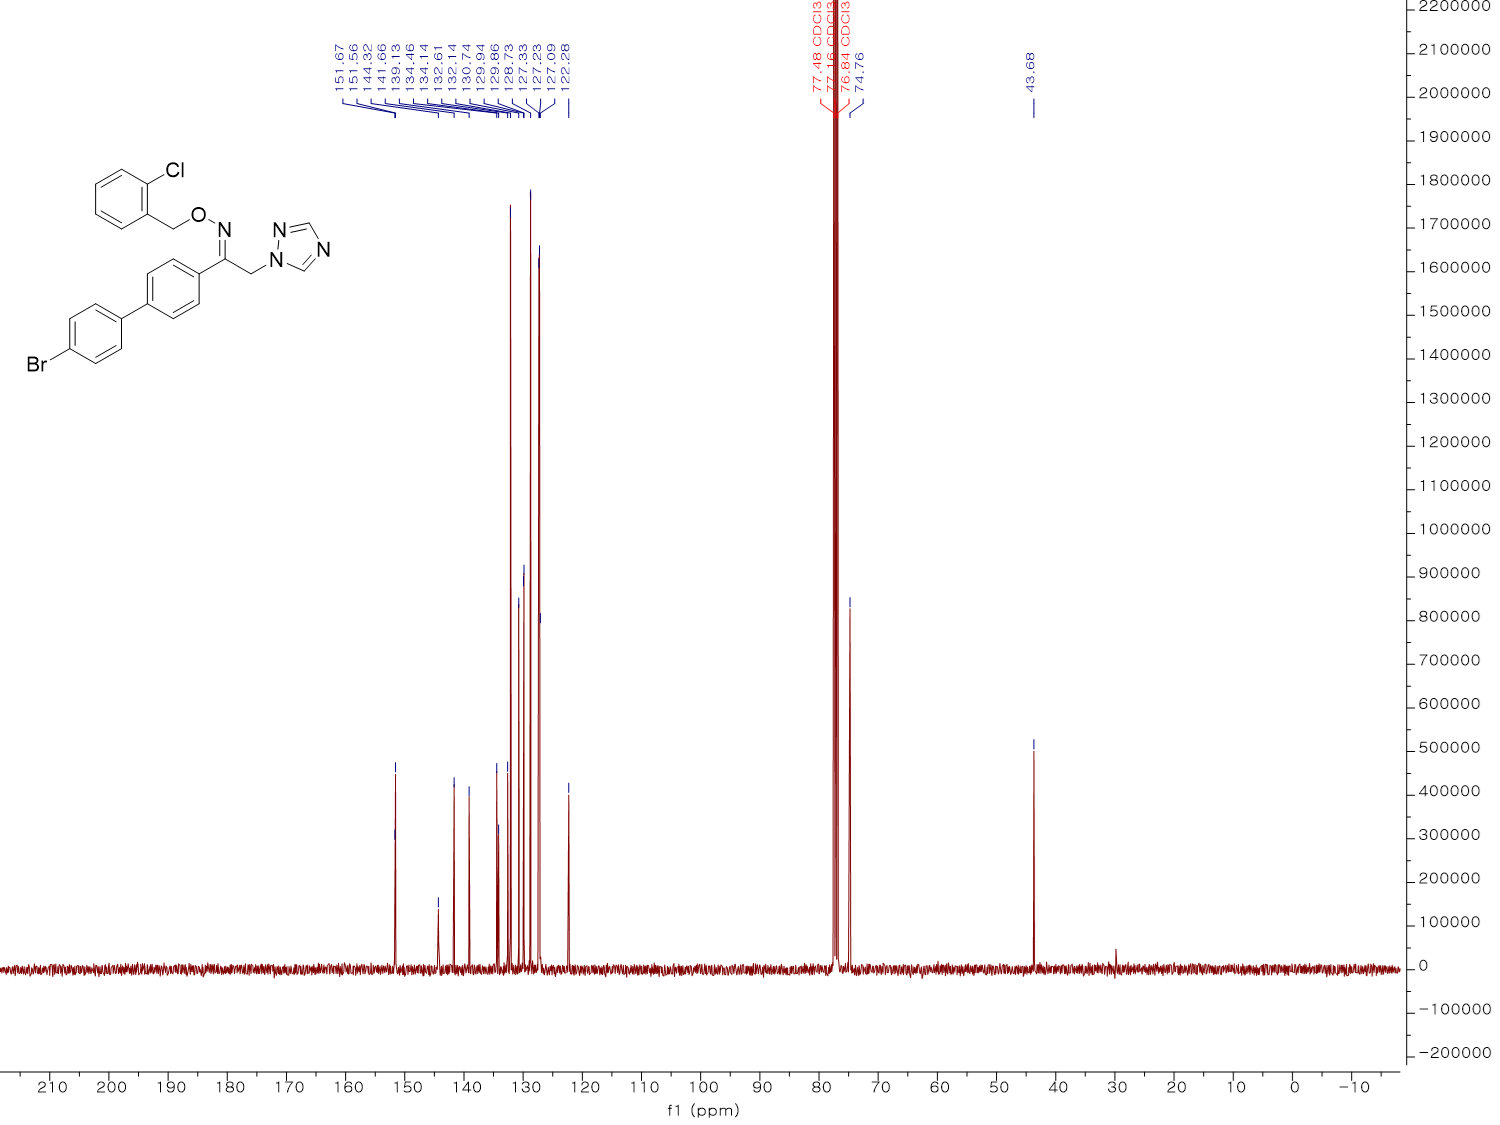


13C NMR spectrum (100 MHz, CDCl3) of **KH12**


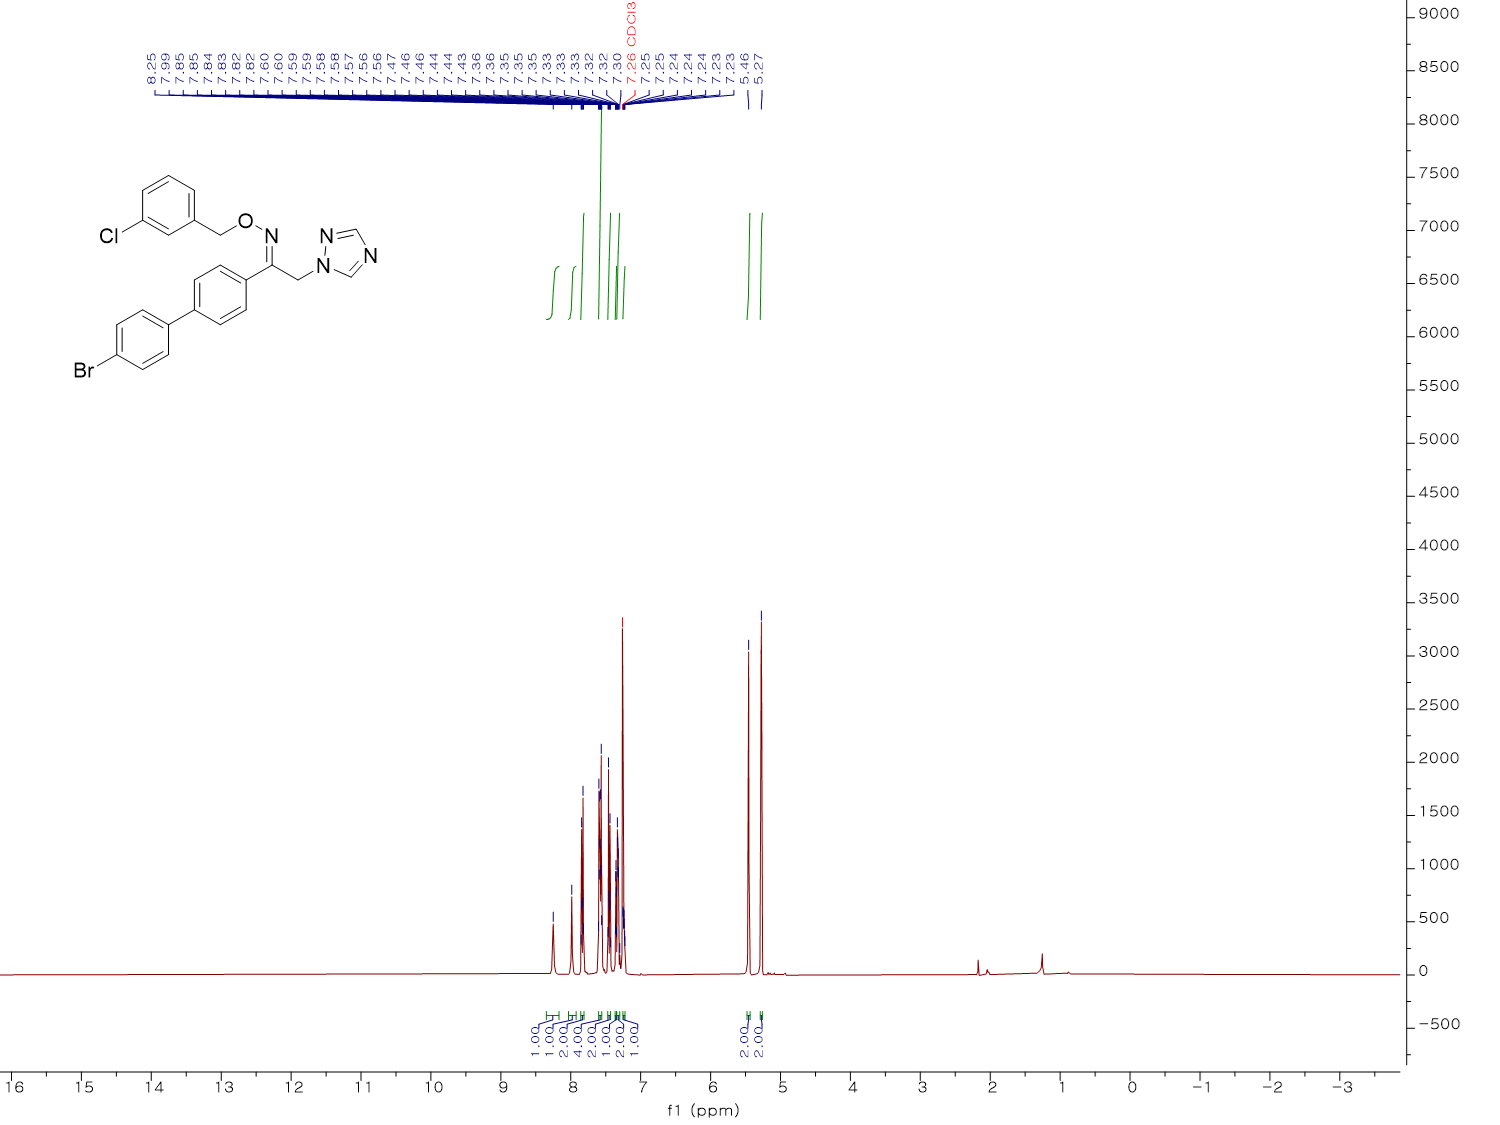
1H NMR spectrum (400 MHz, CDCl3) of **KH13**


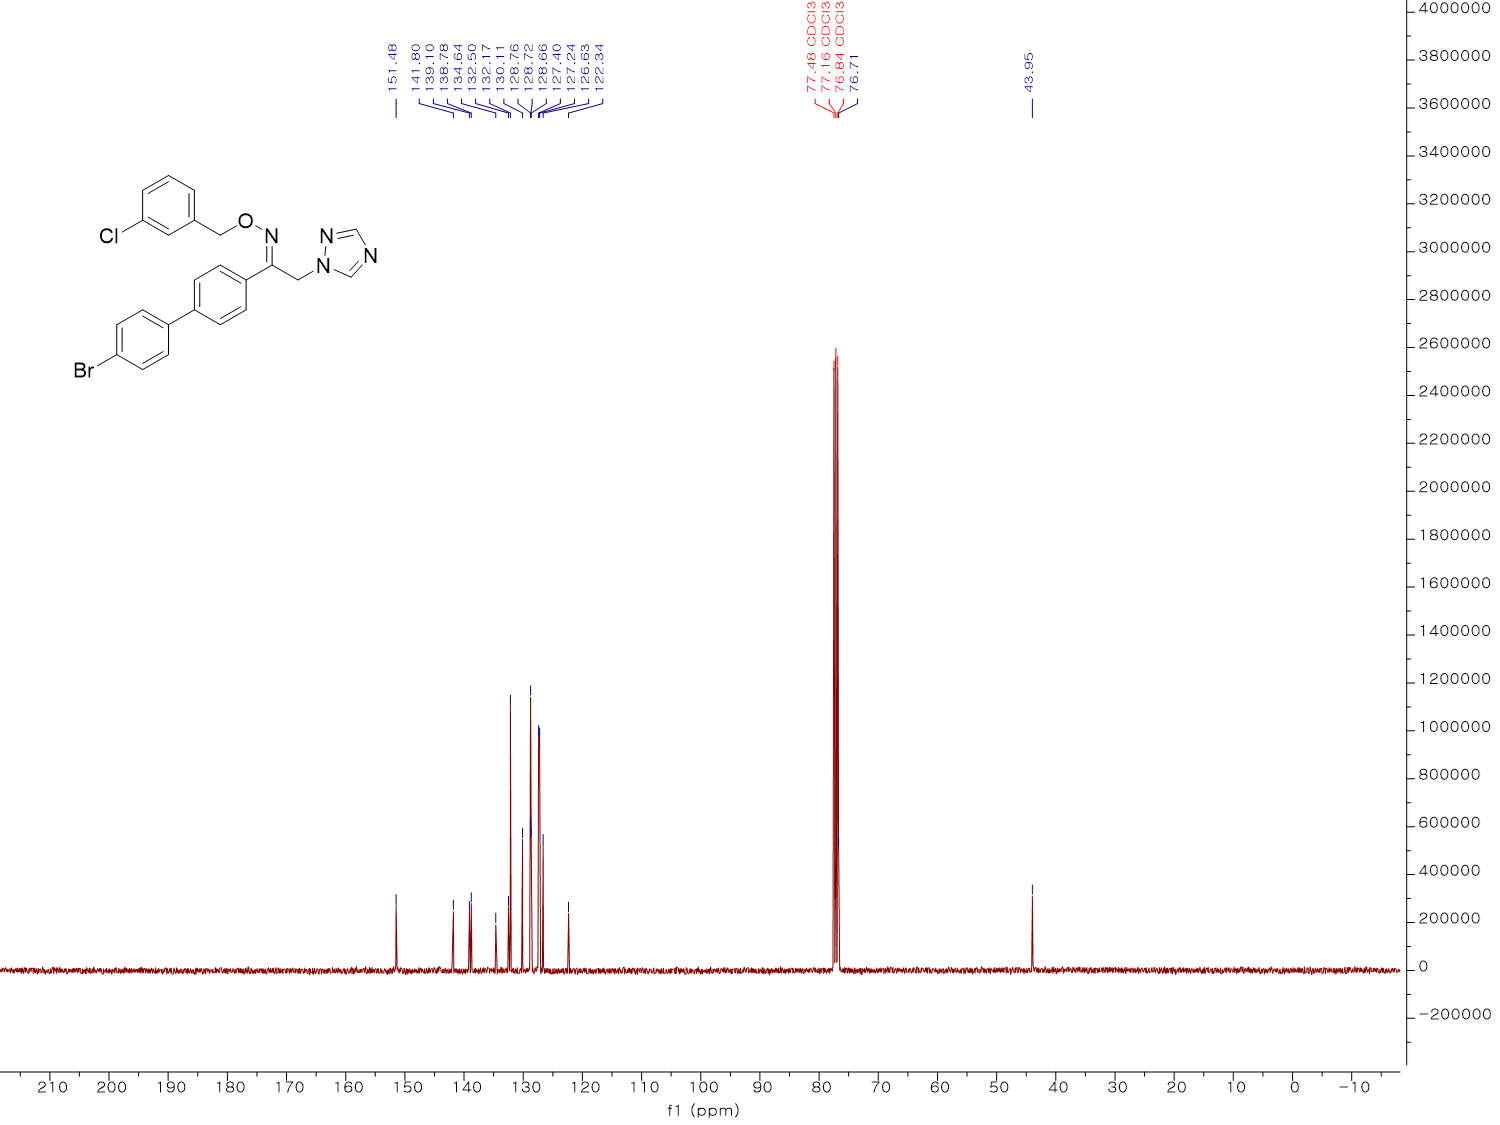


13C NMR spectrum (100 MHz, CDCl3) of **KH13**


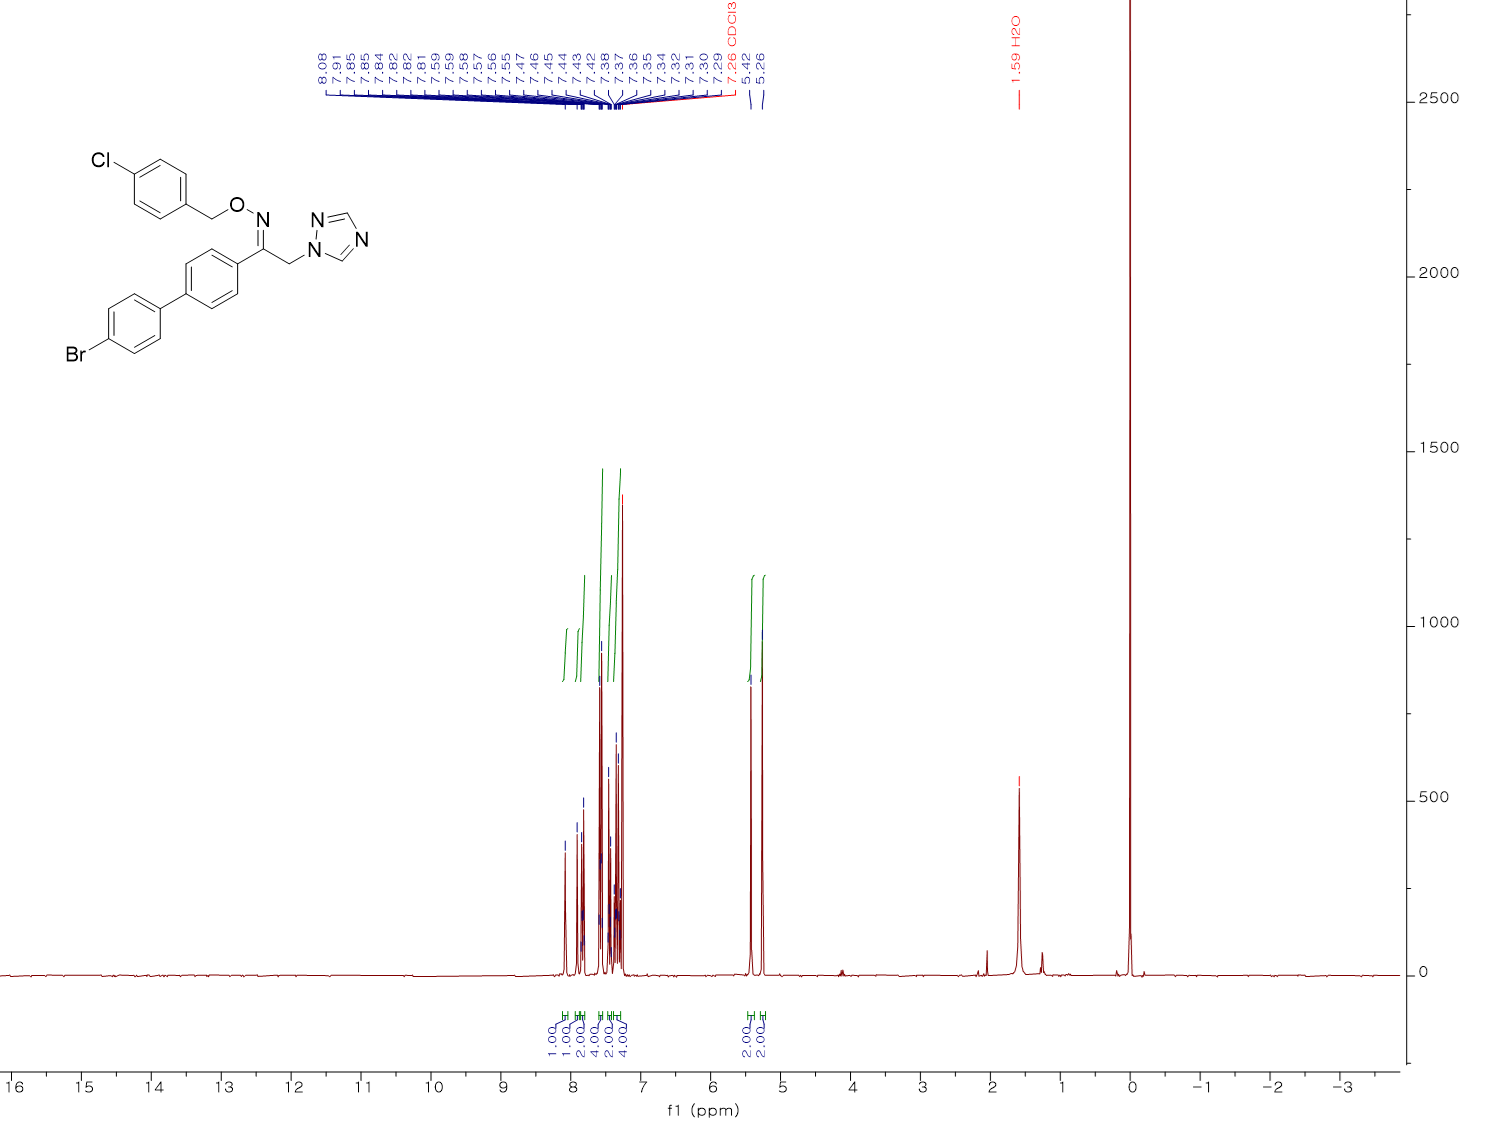


1H NMR spectrum (300 MHz, CDCl3) of **KH14**


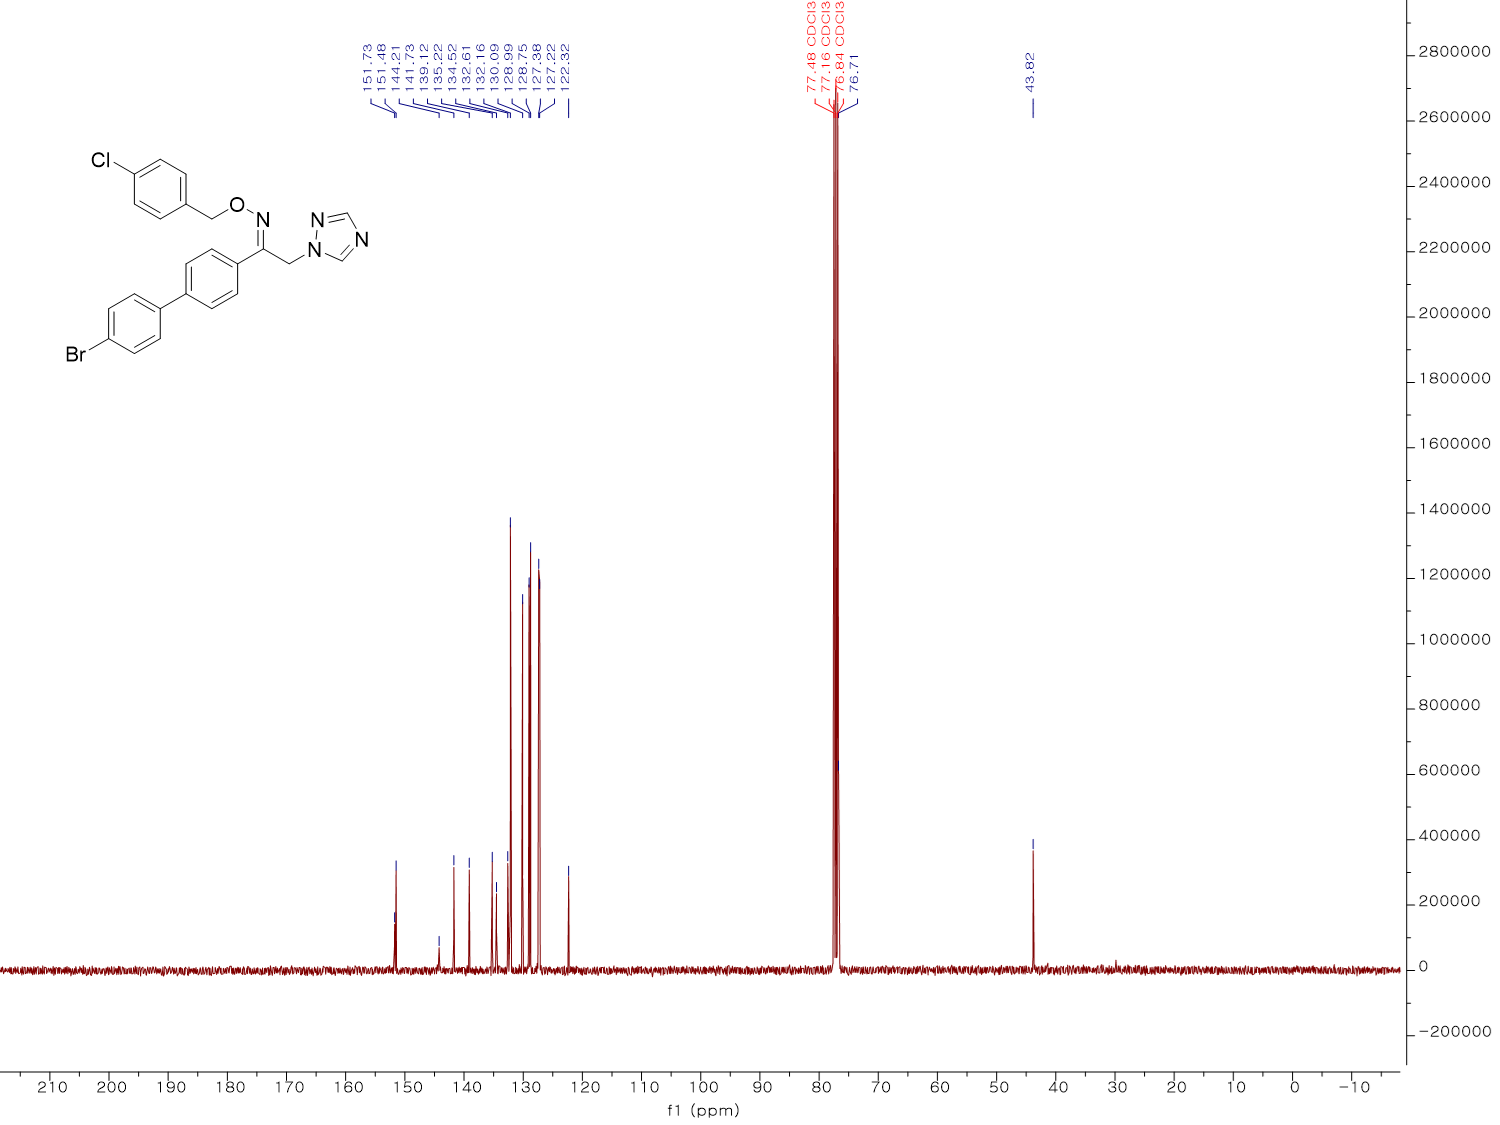
13C NMR spectrum (100 MHz, CDCl3) of **KH14**


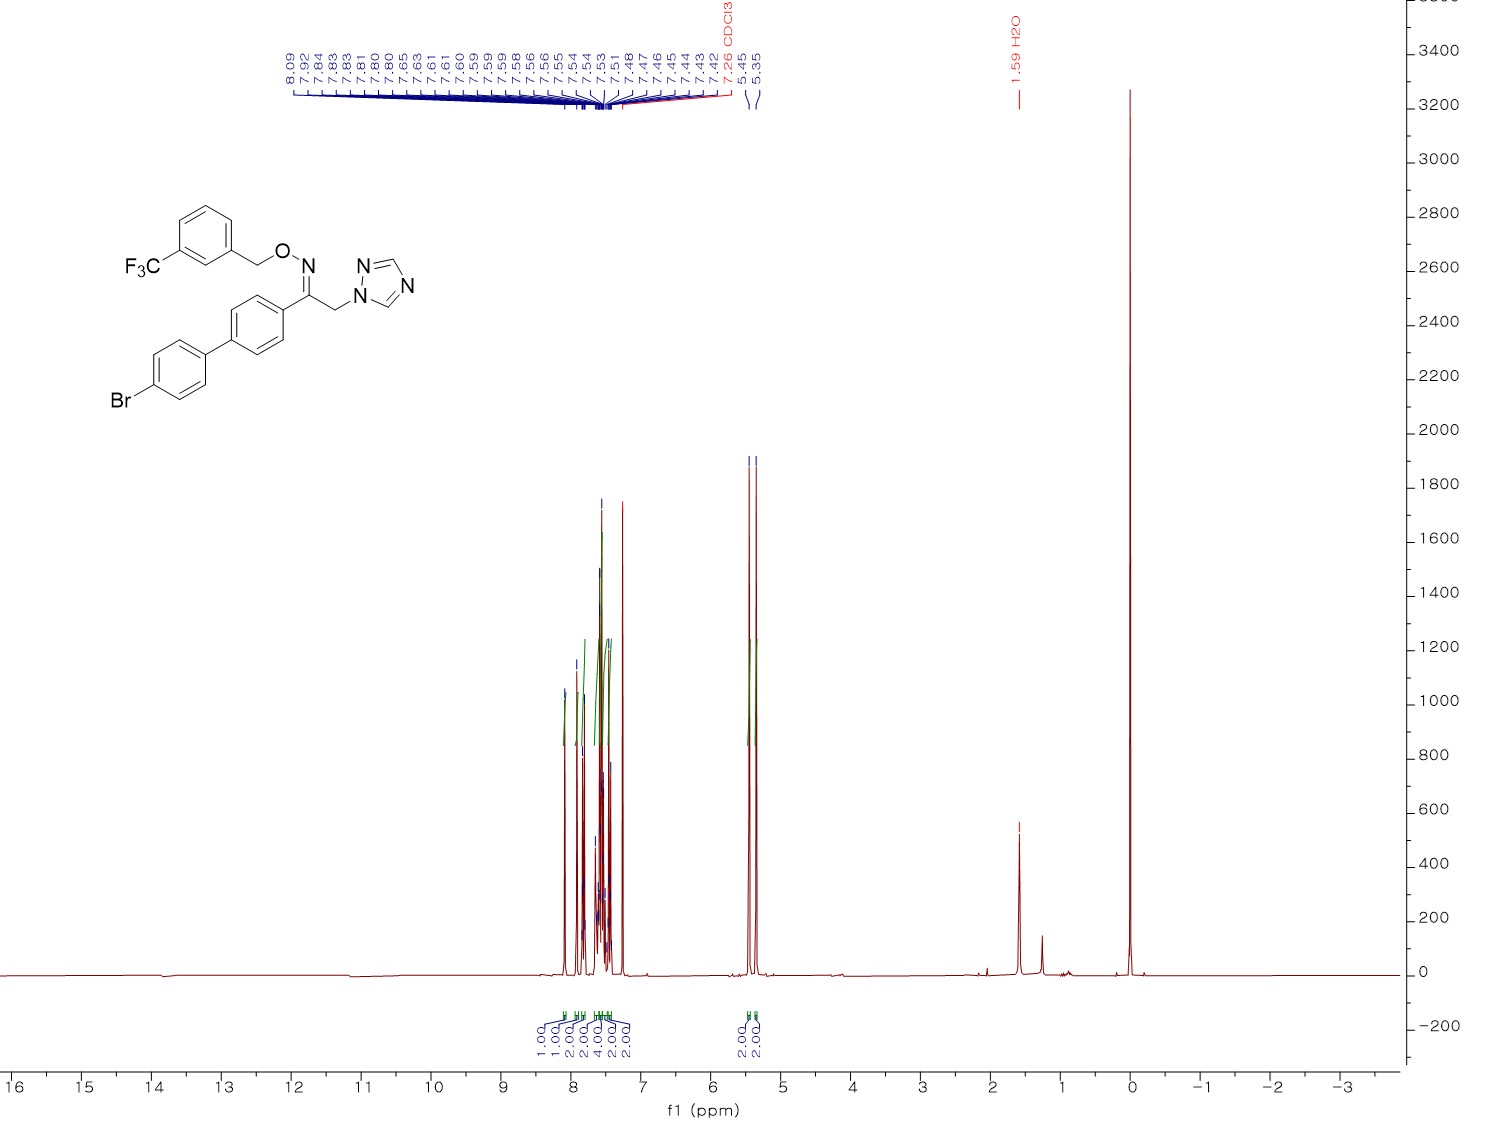


1H NMR spectrum (300 MHz, CDCl3) of **KH15**


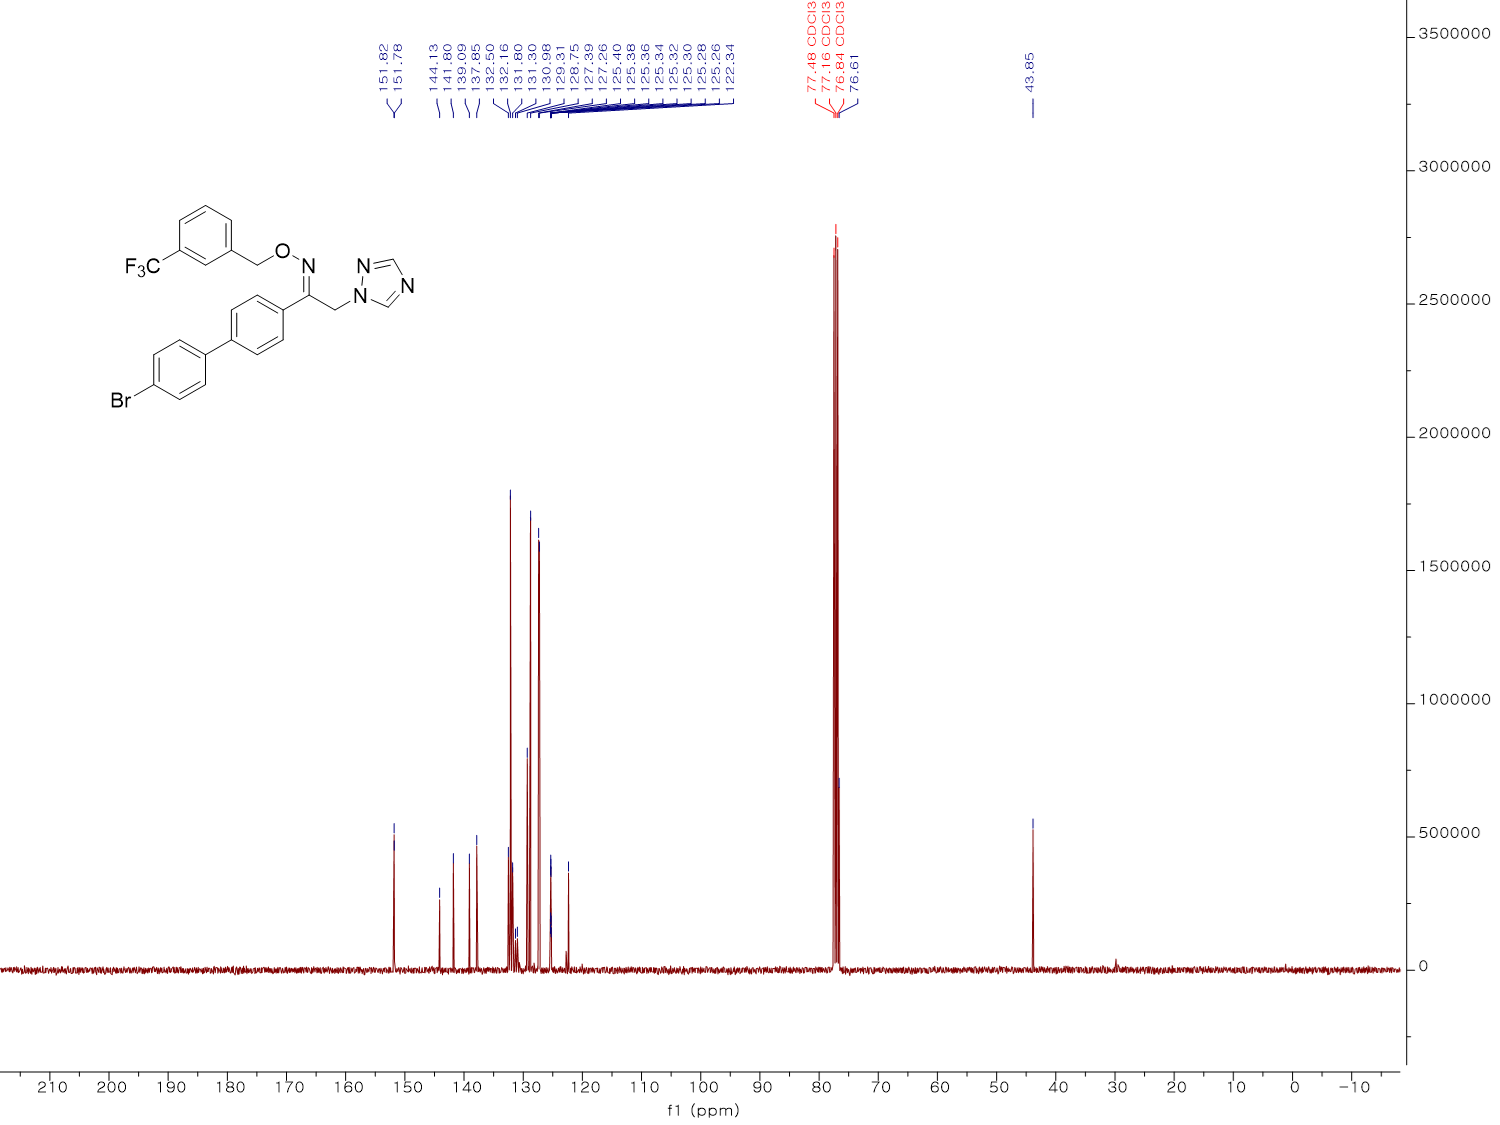


13C NMR spectrum (100 MHz, CDCl3) of **KH15**


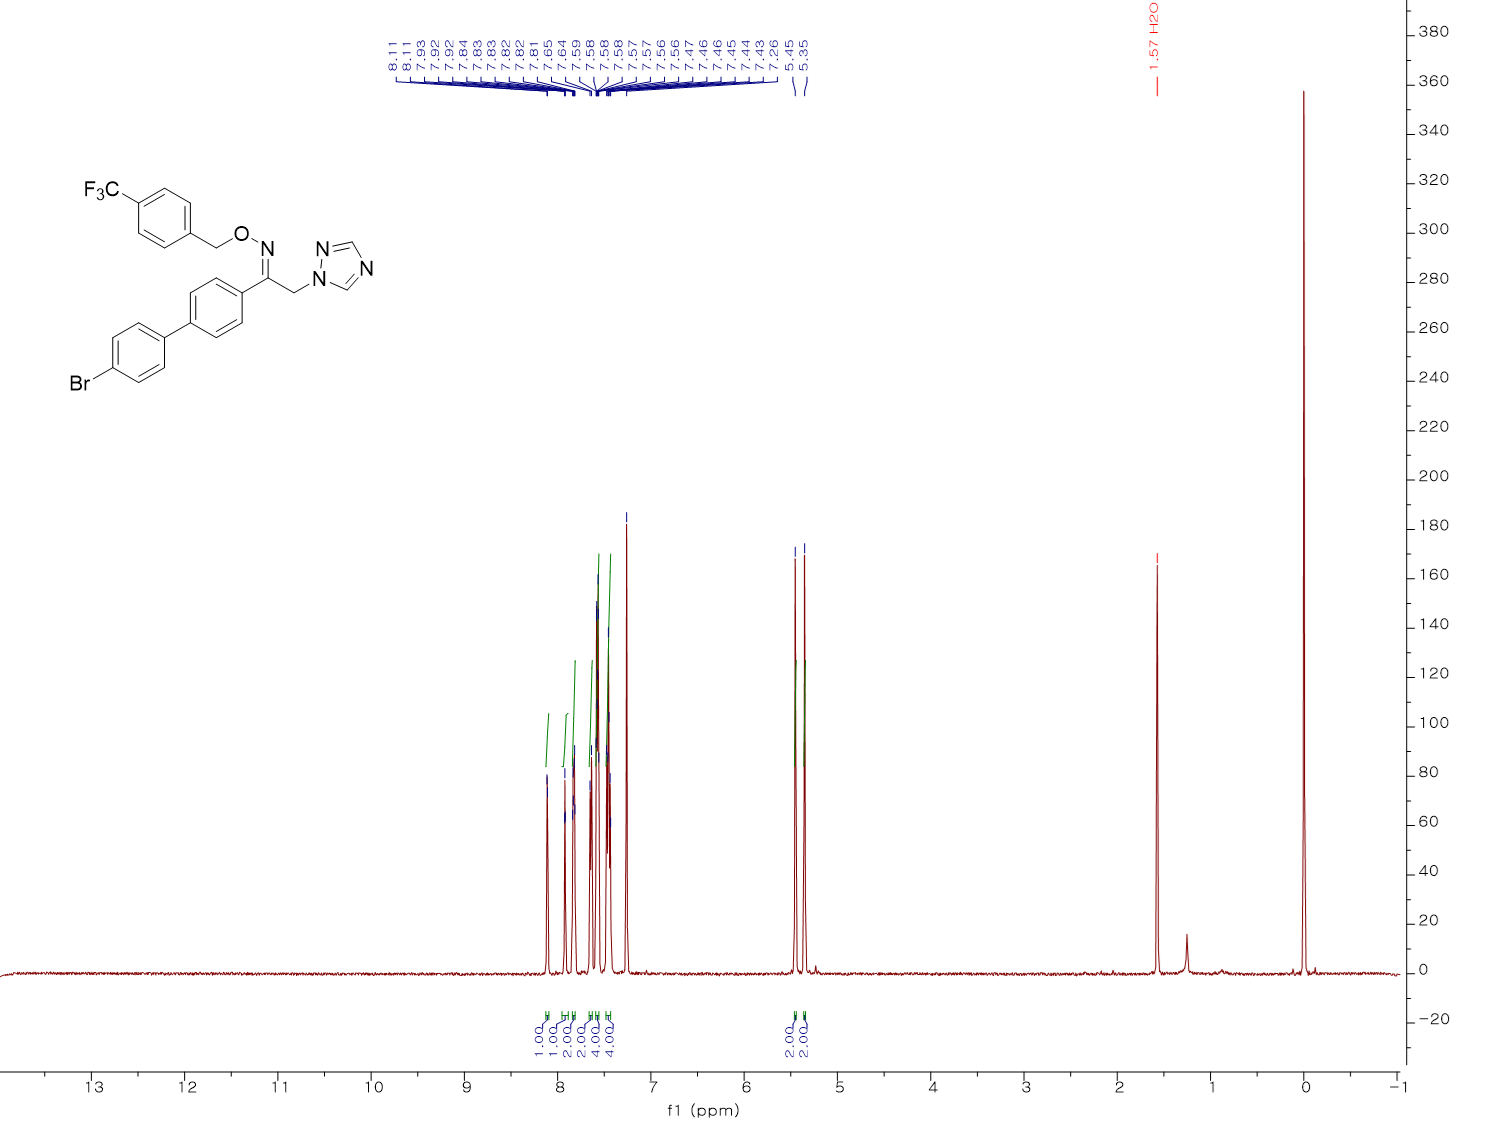


1H NMR spectrum (500 MHz, CDCl3) of **KH16**


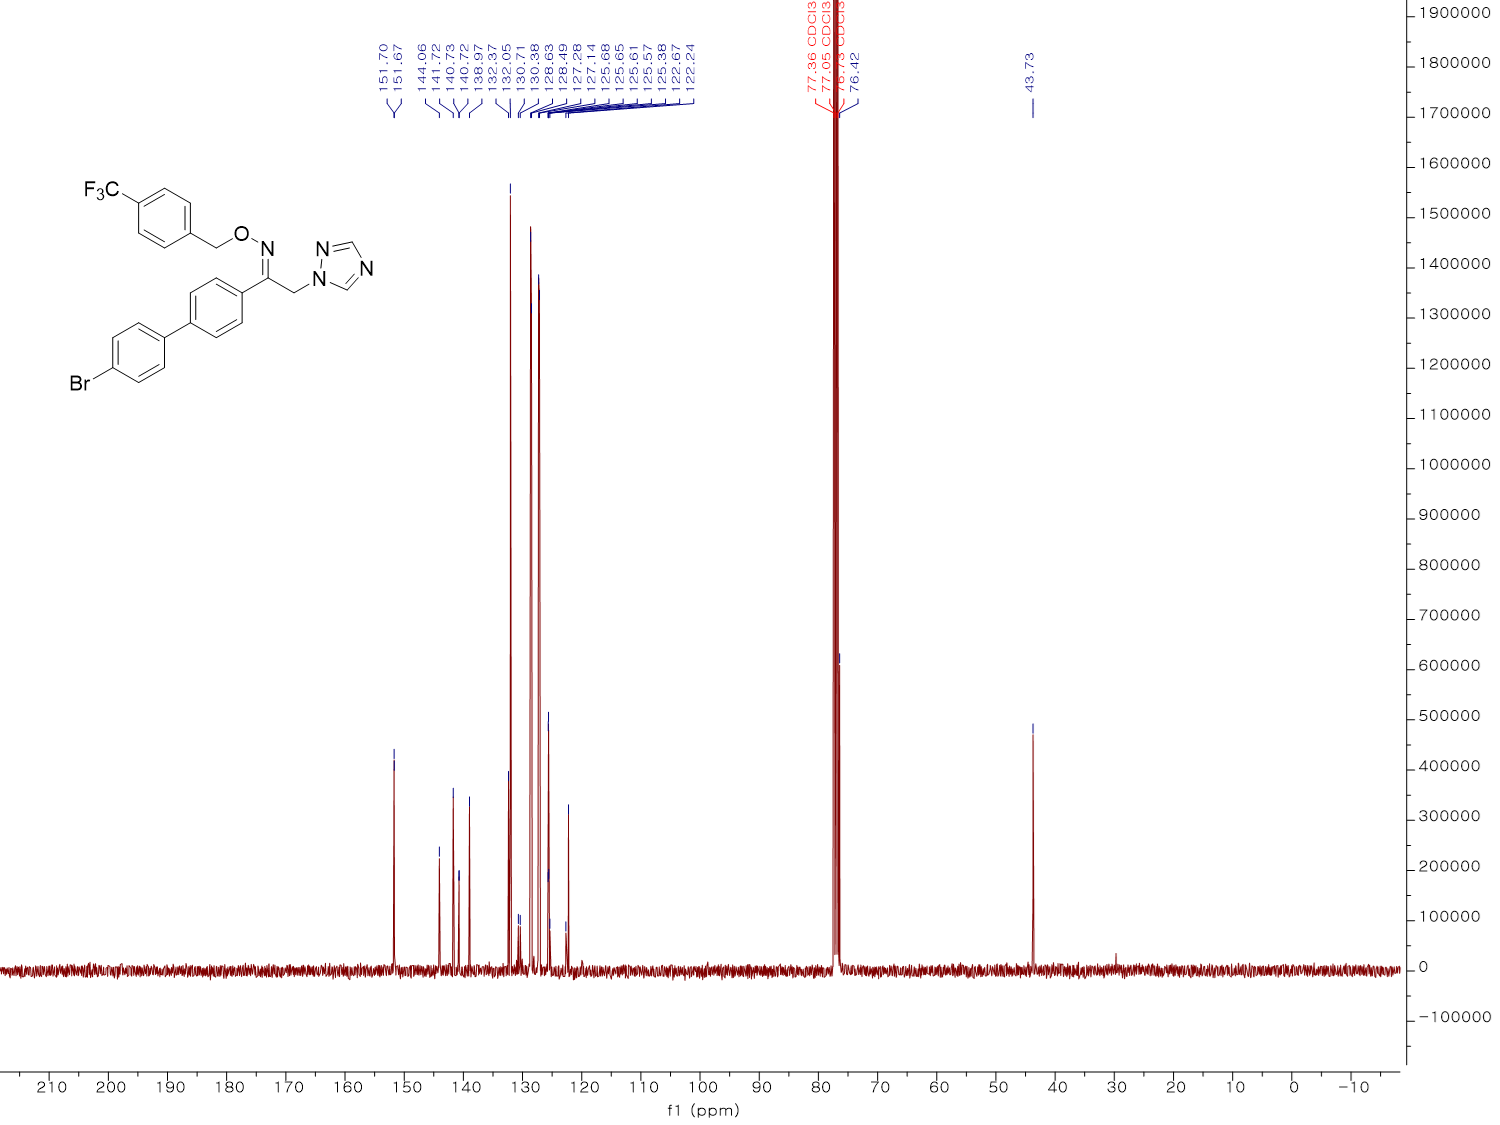


13C NMR spectrum (100 MHz, CDCl3) of **KH16**


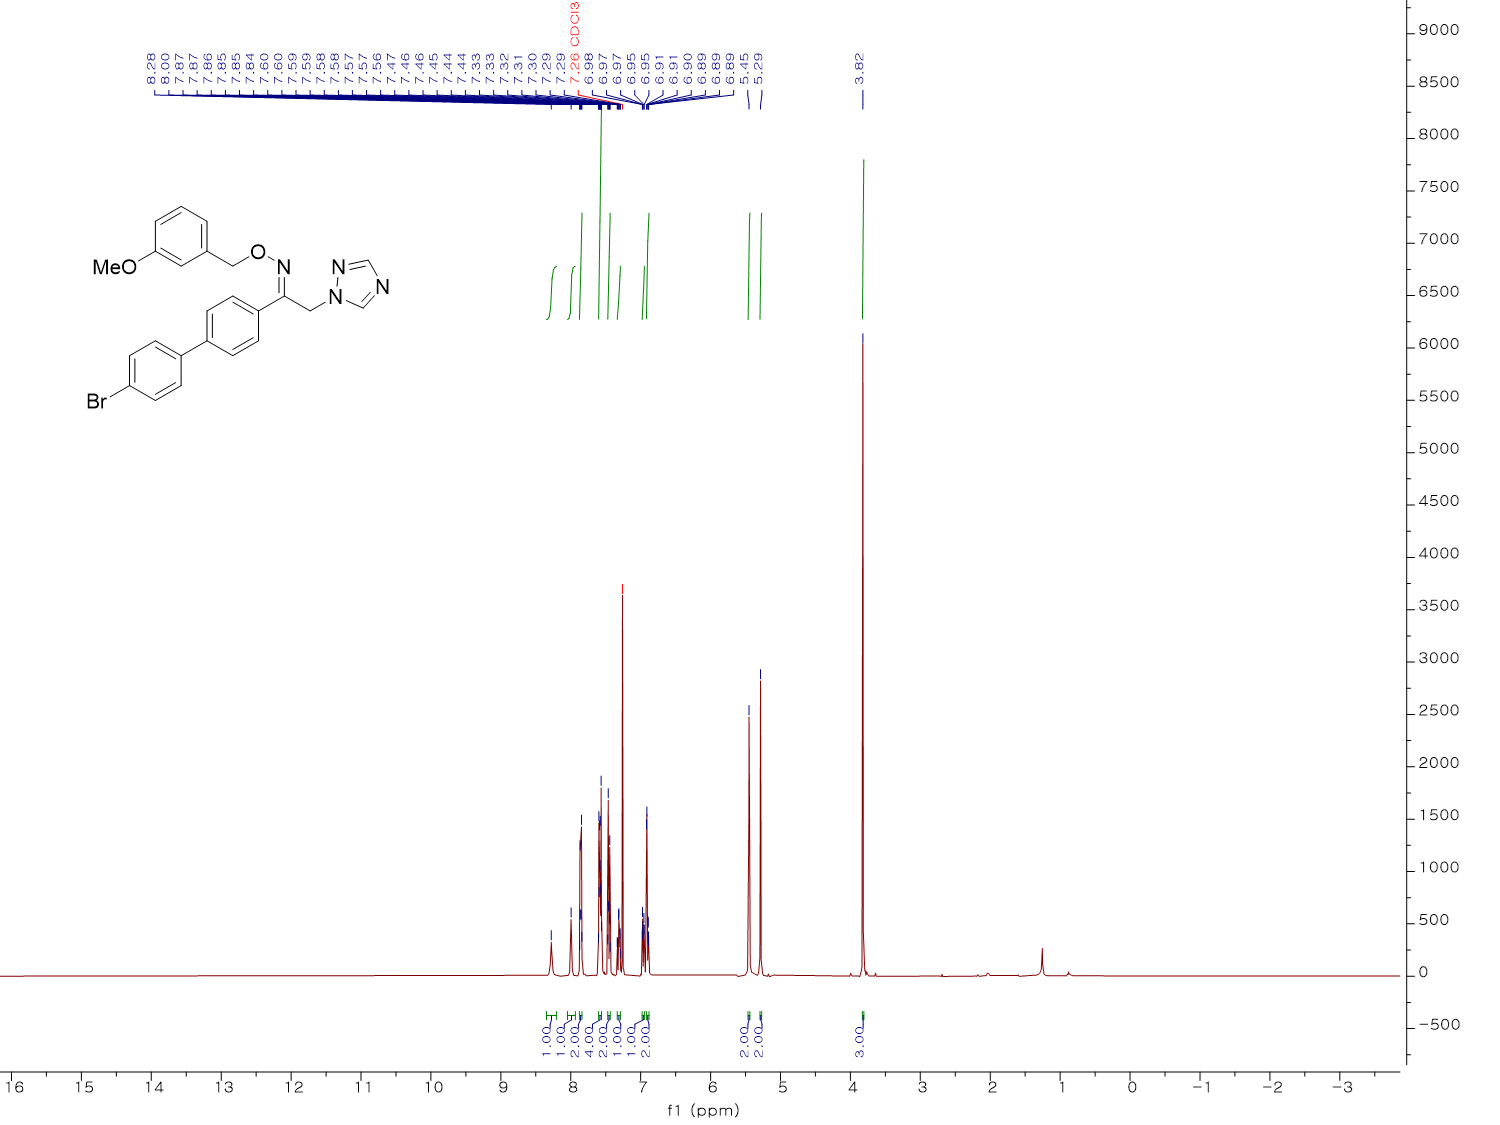
1H NMR spectrum (400 MHz, CDCl3) of **KH17**


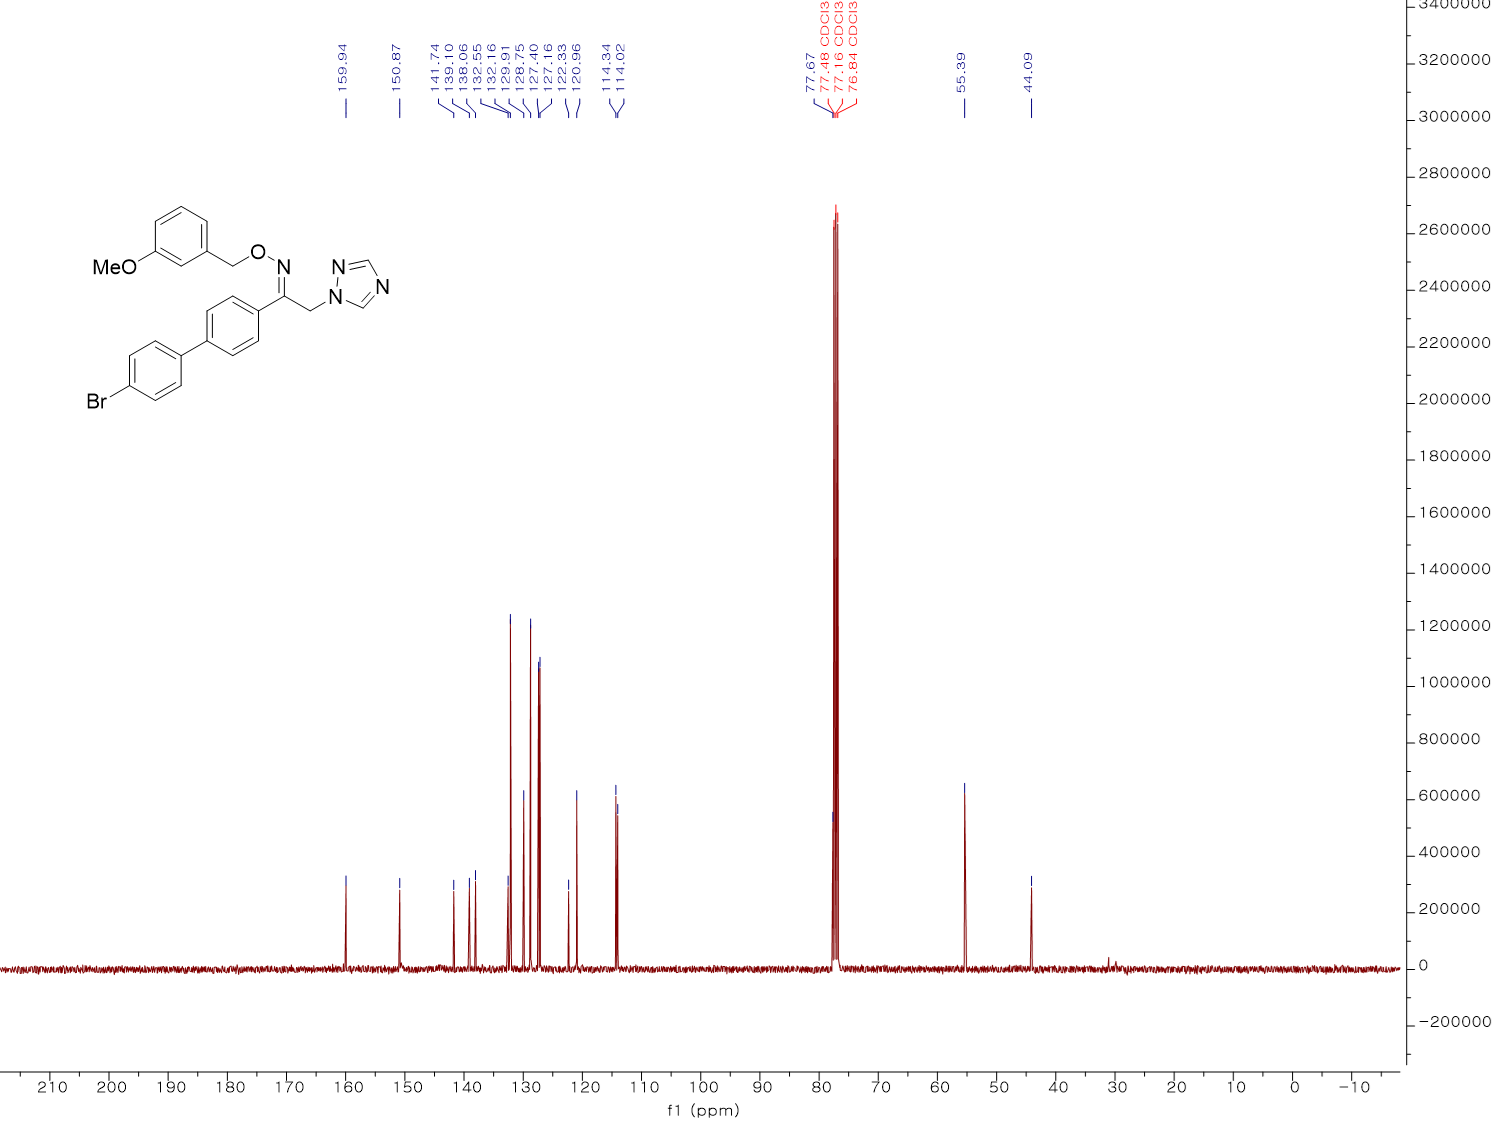
13C NMR spectrum (100 MHz, CDCl3) of **KH17**


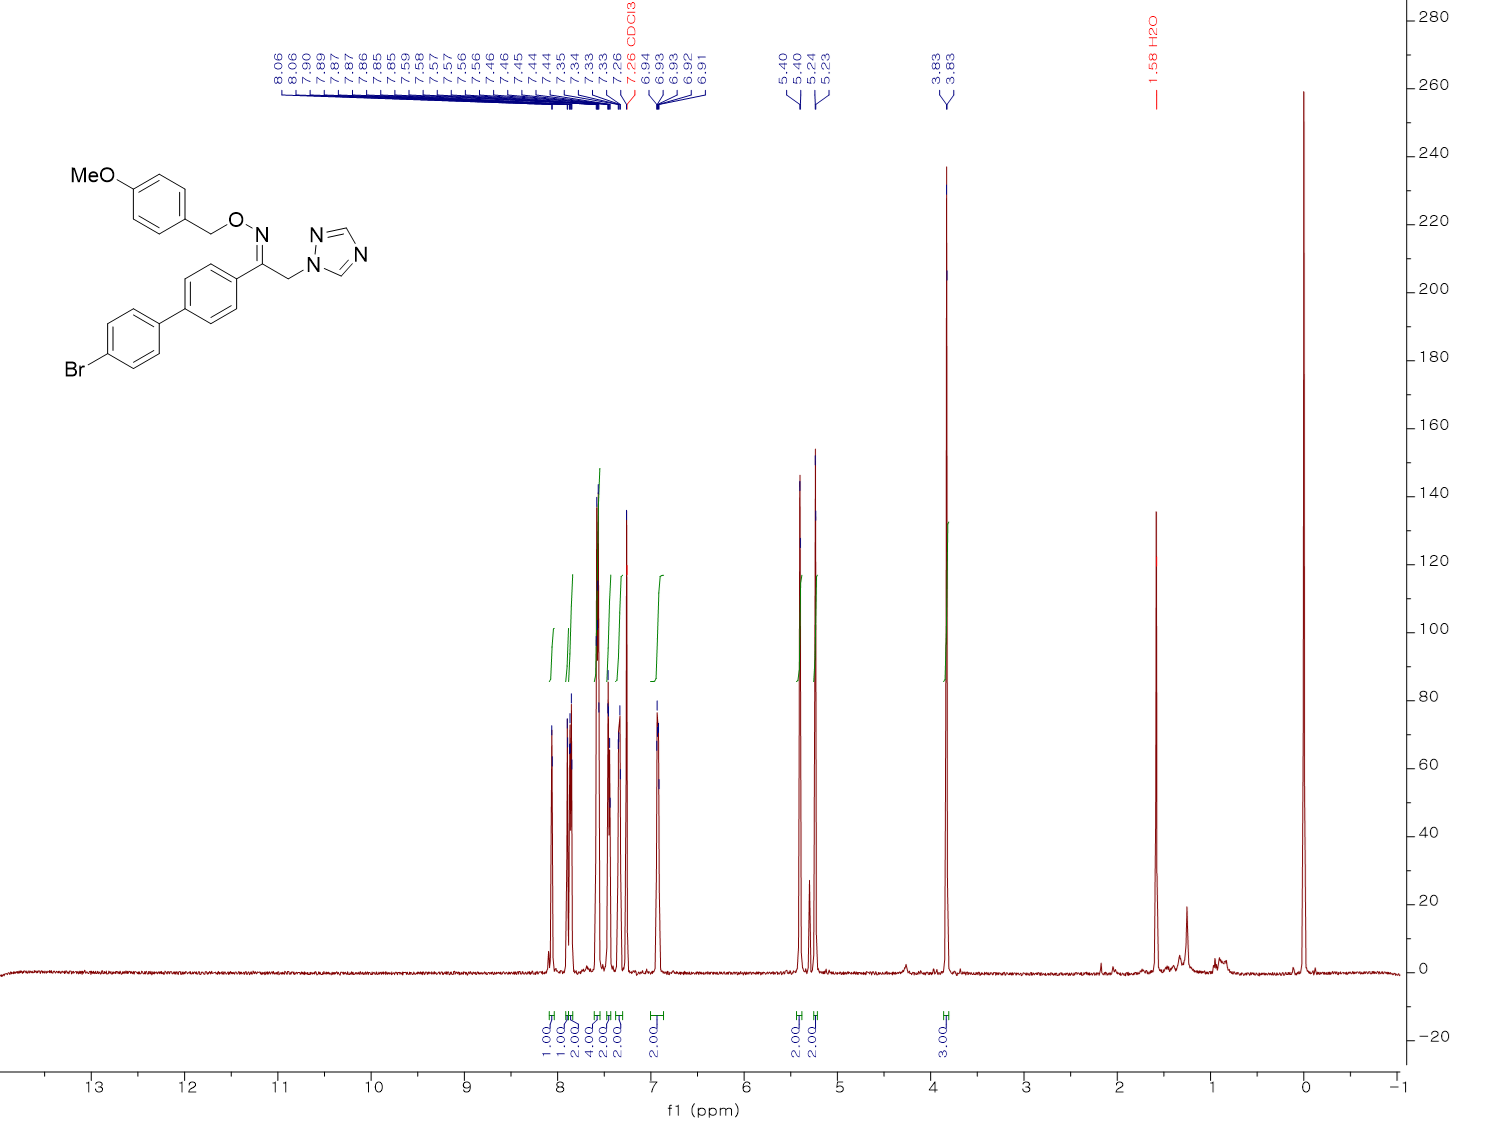


1H NMR spectrum (500 MHz, CDCl3) of **KH18**


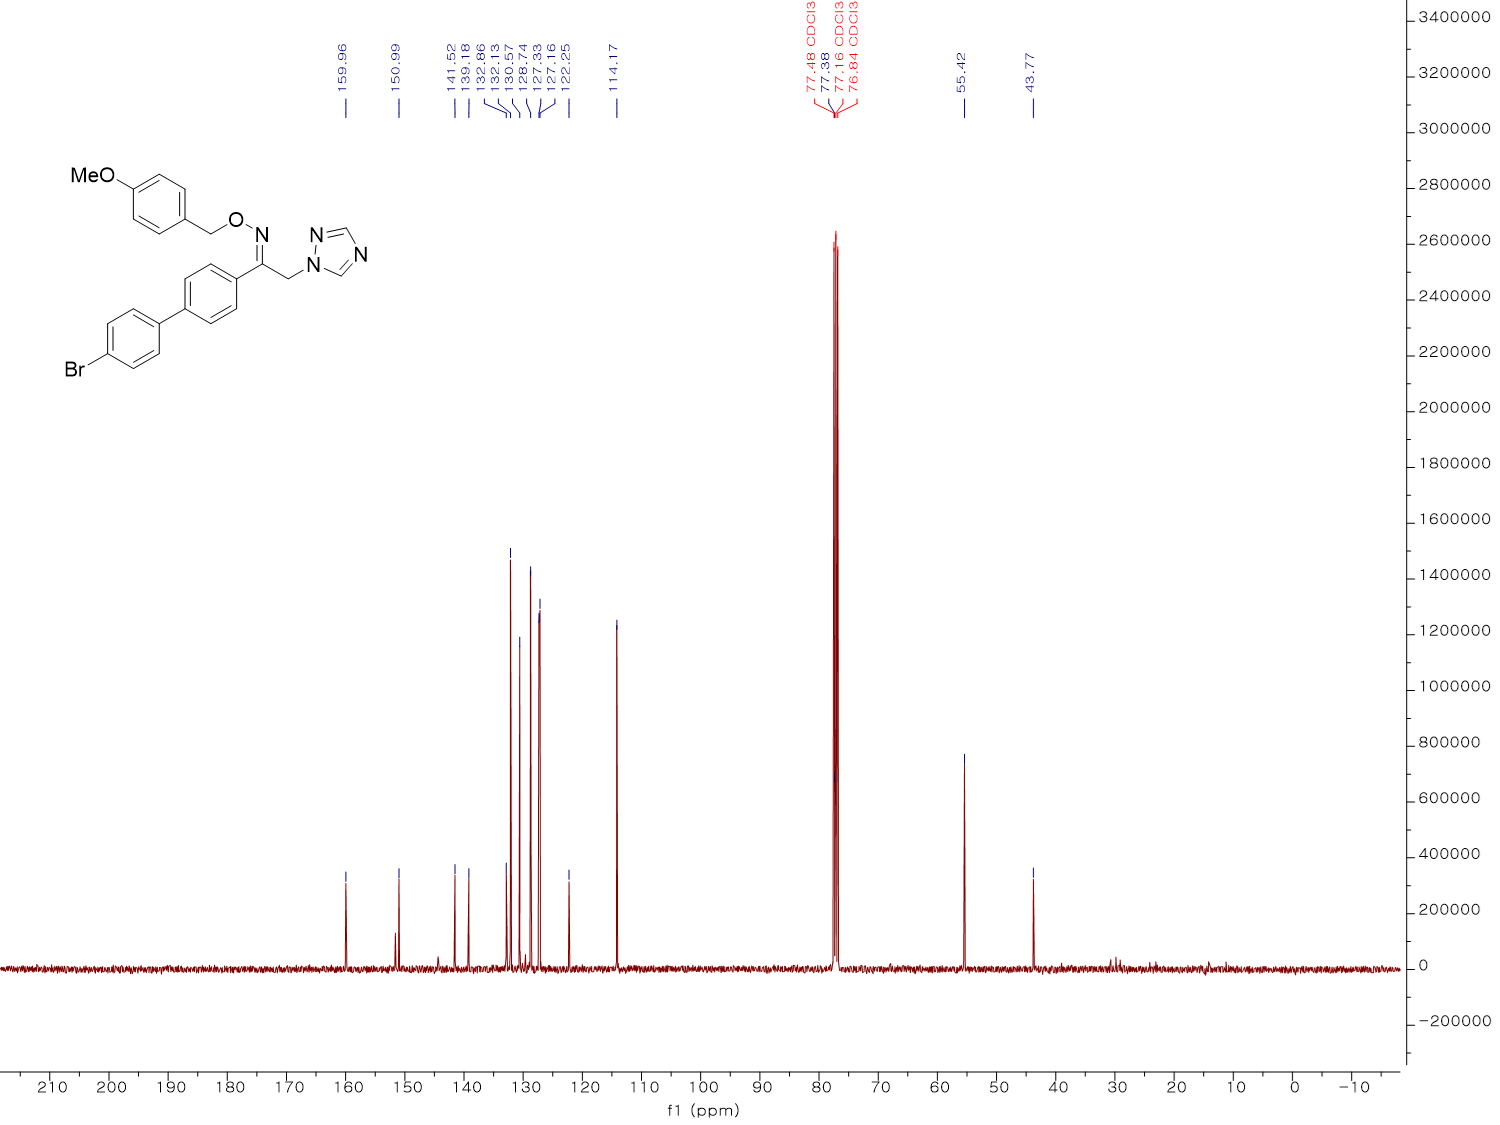


13C NMR spectrum (100 MHz, CDCl3) of **KH18**


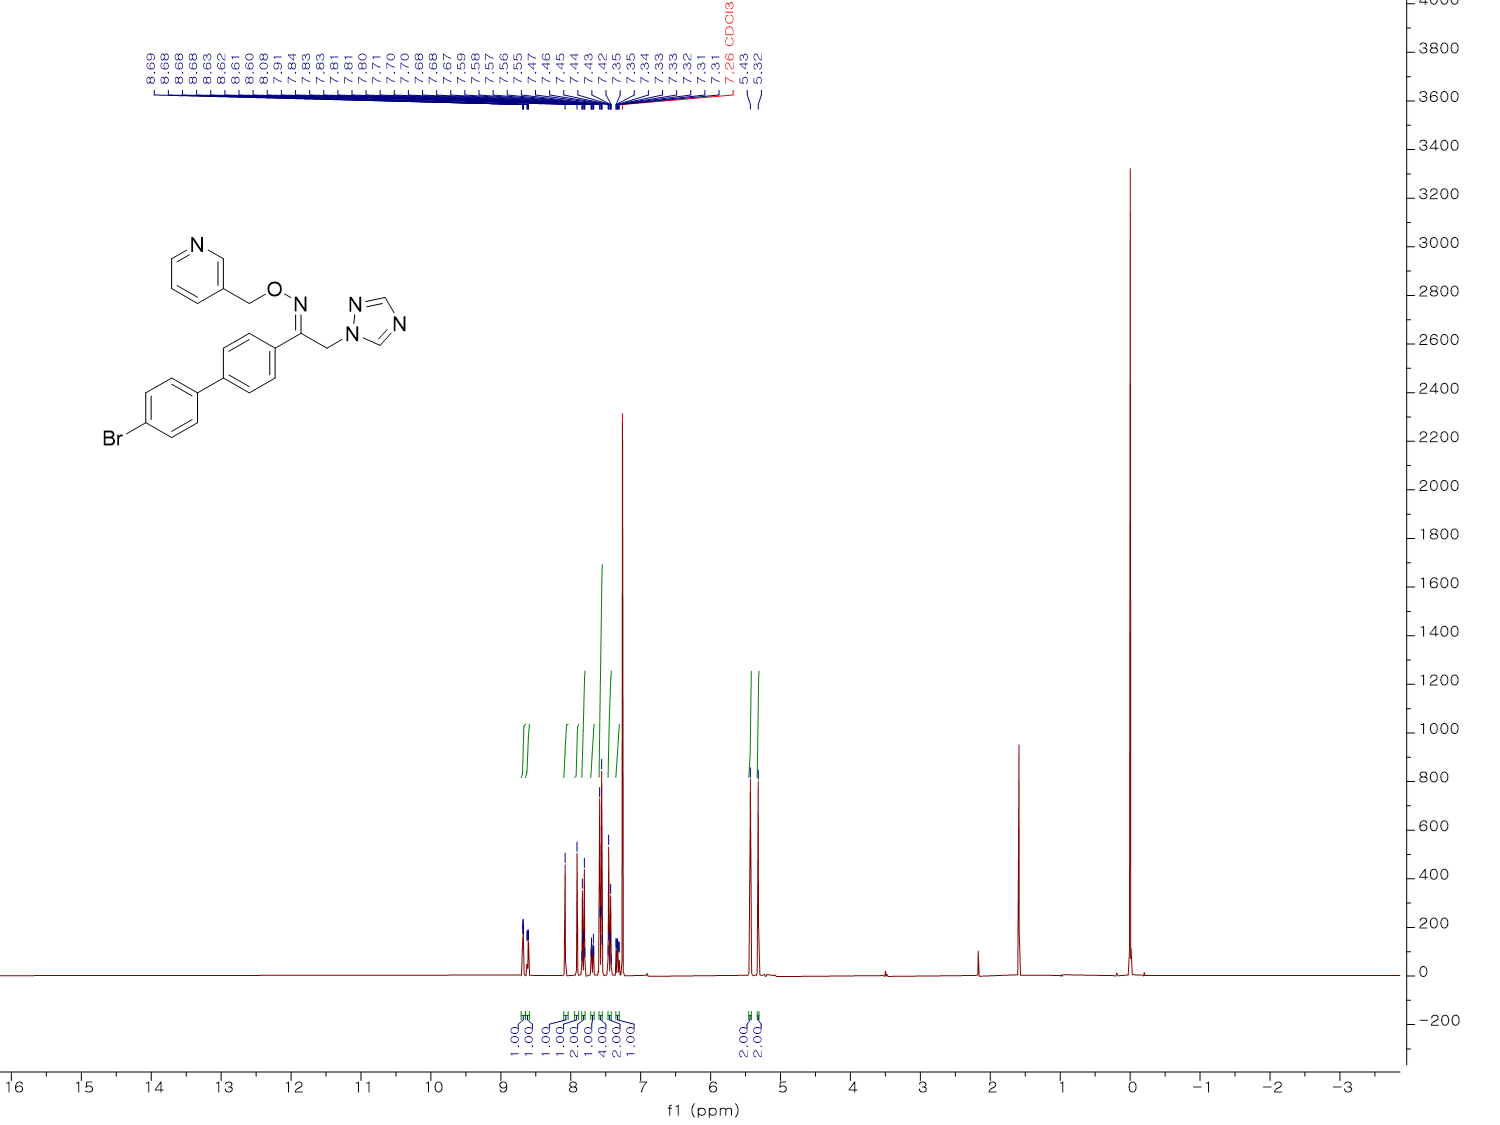


1H NMR spectrum (300 MHz, CDCl3) of **KH19**


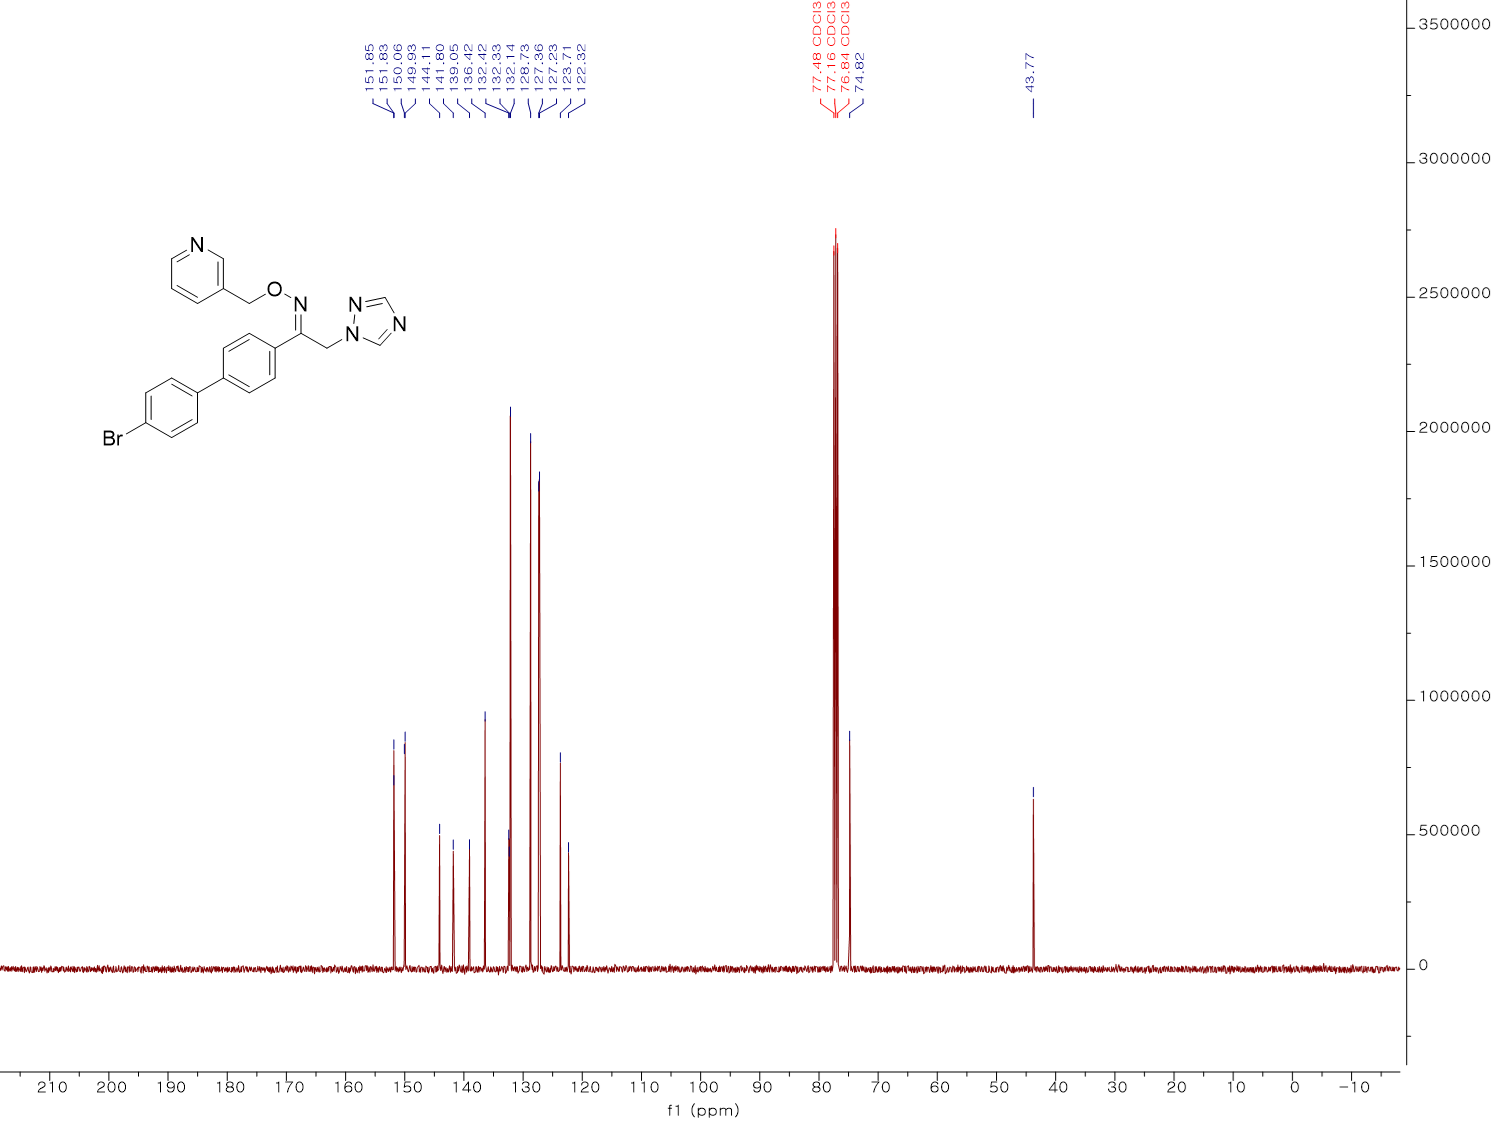


13C NMR spectrum (100 MHz, CDCl3) of **KH19**


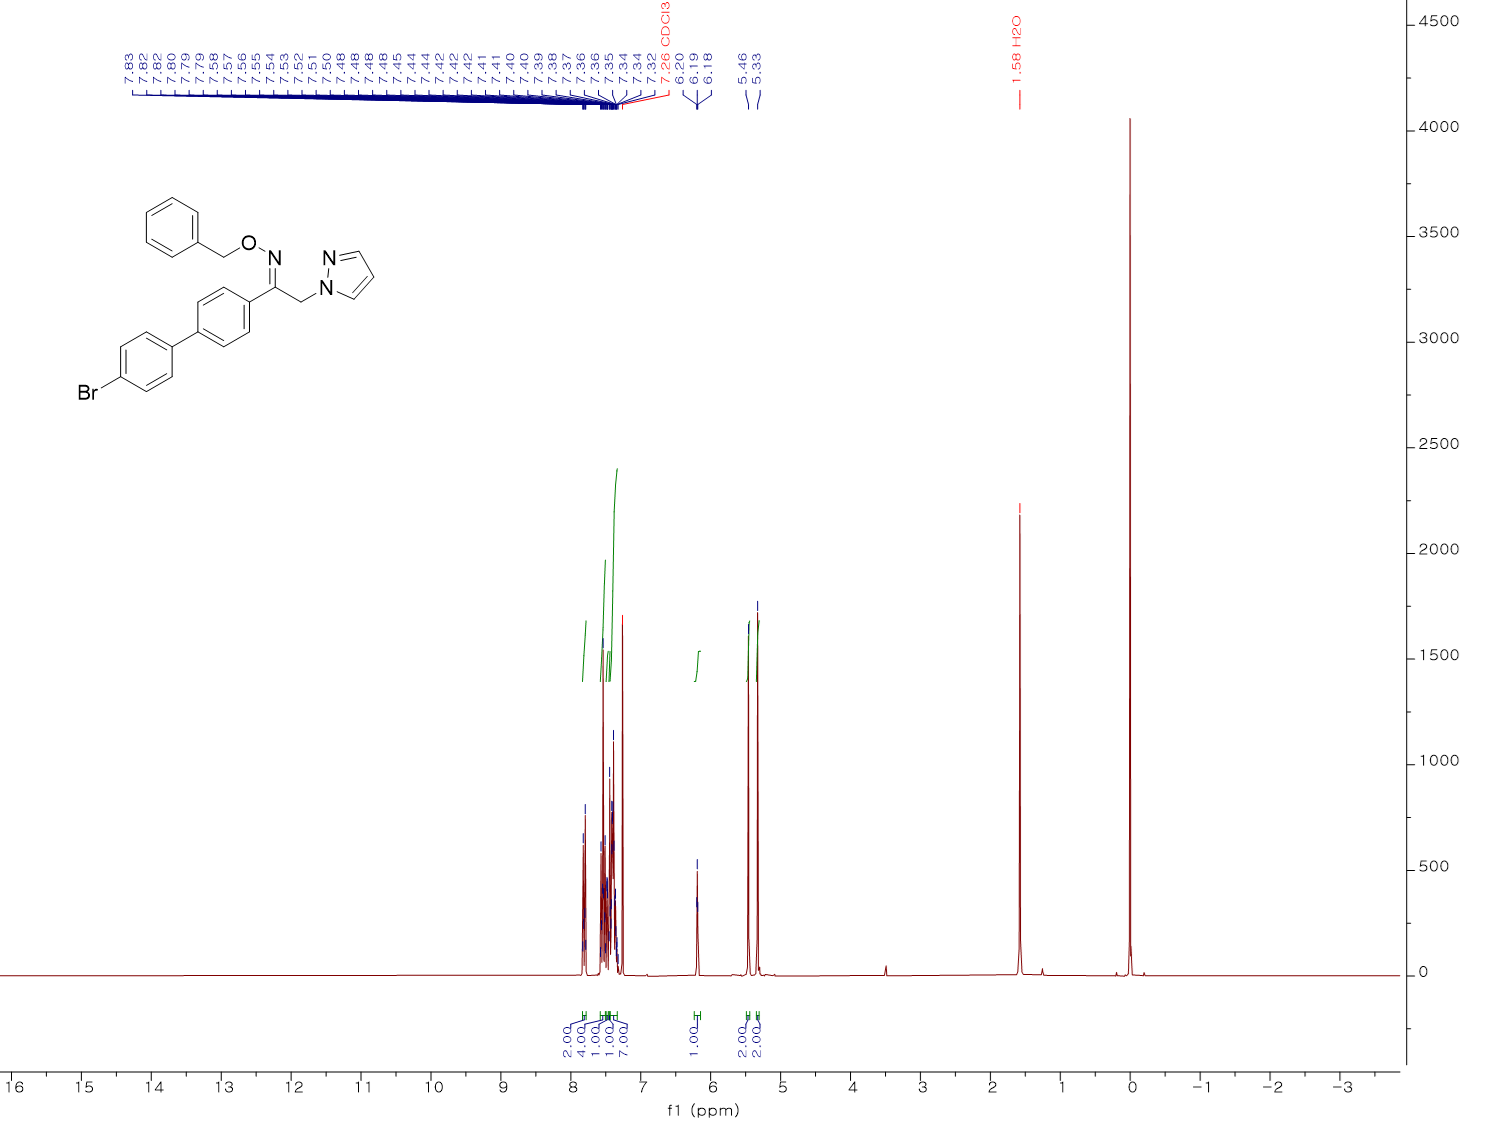


1H NMR spectrum (300 MHz, CDCl3) of **KH20**


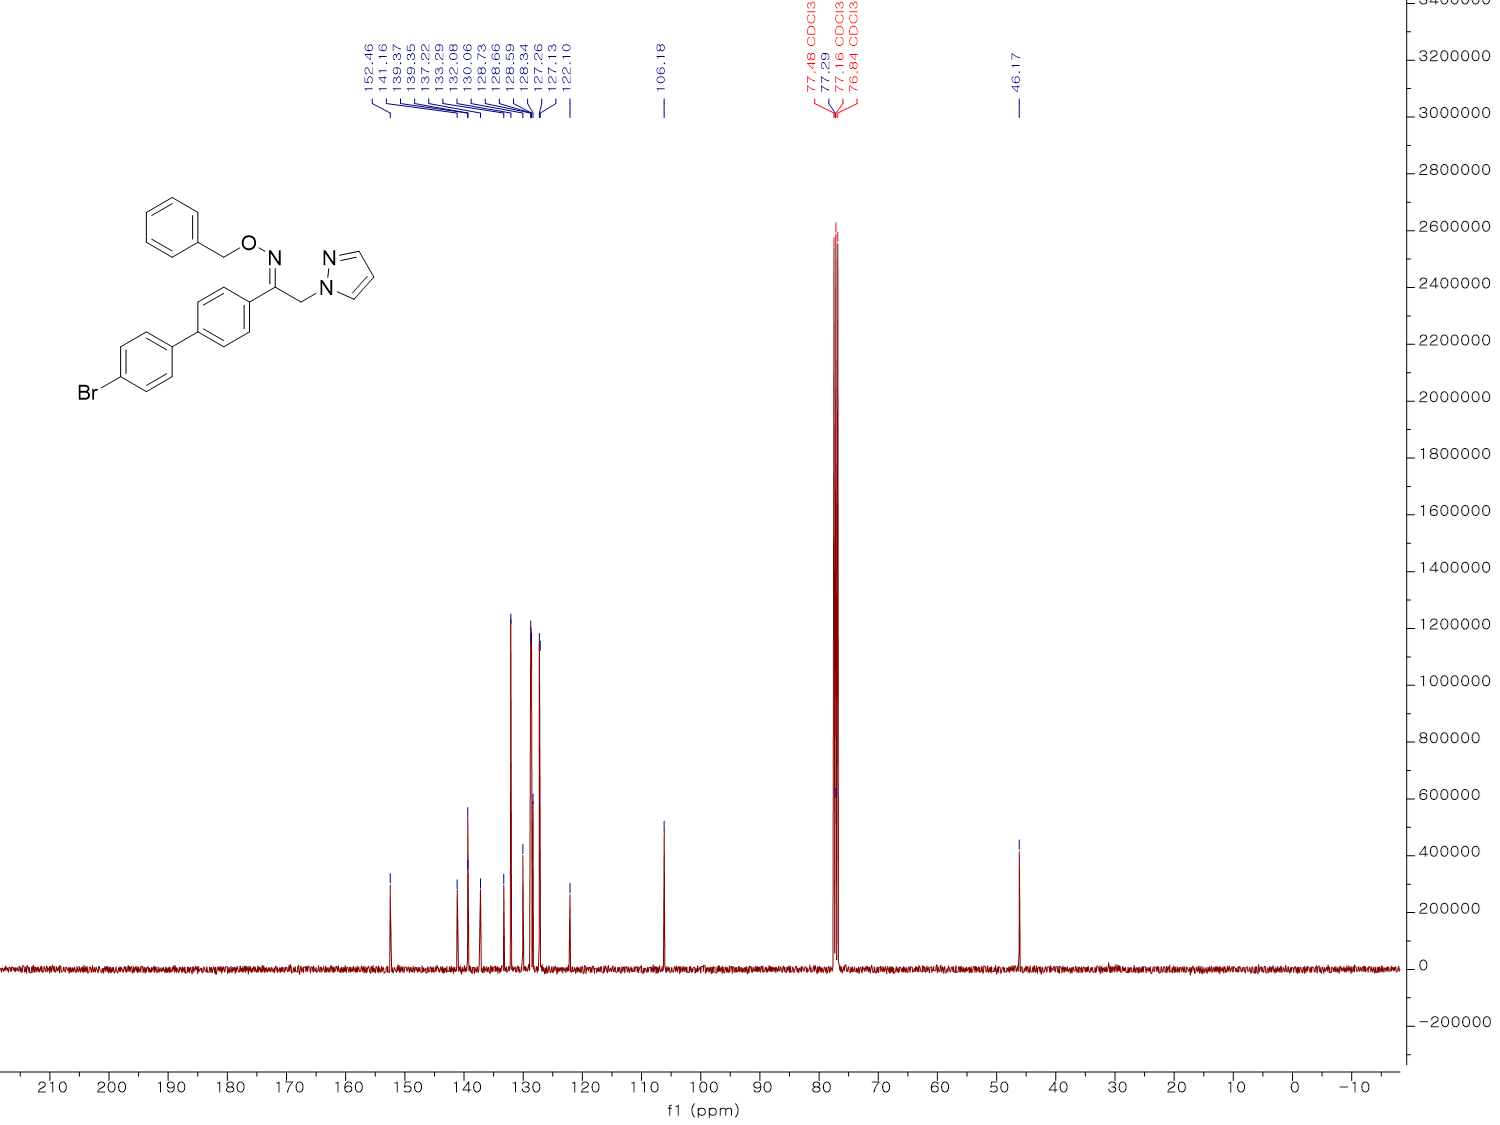


13C NMR spectrum (100 MHz, CDCl3) of **KH20**

**
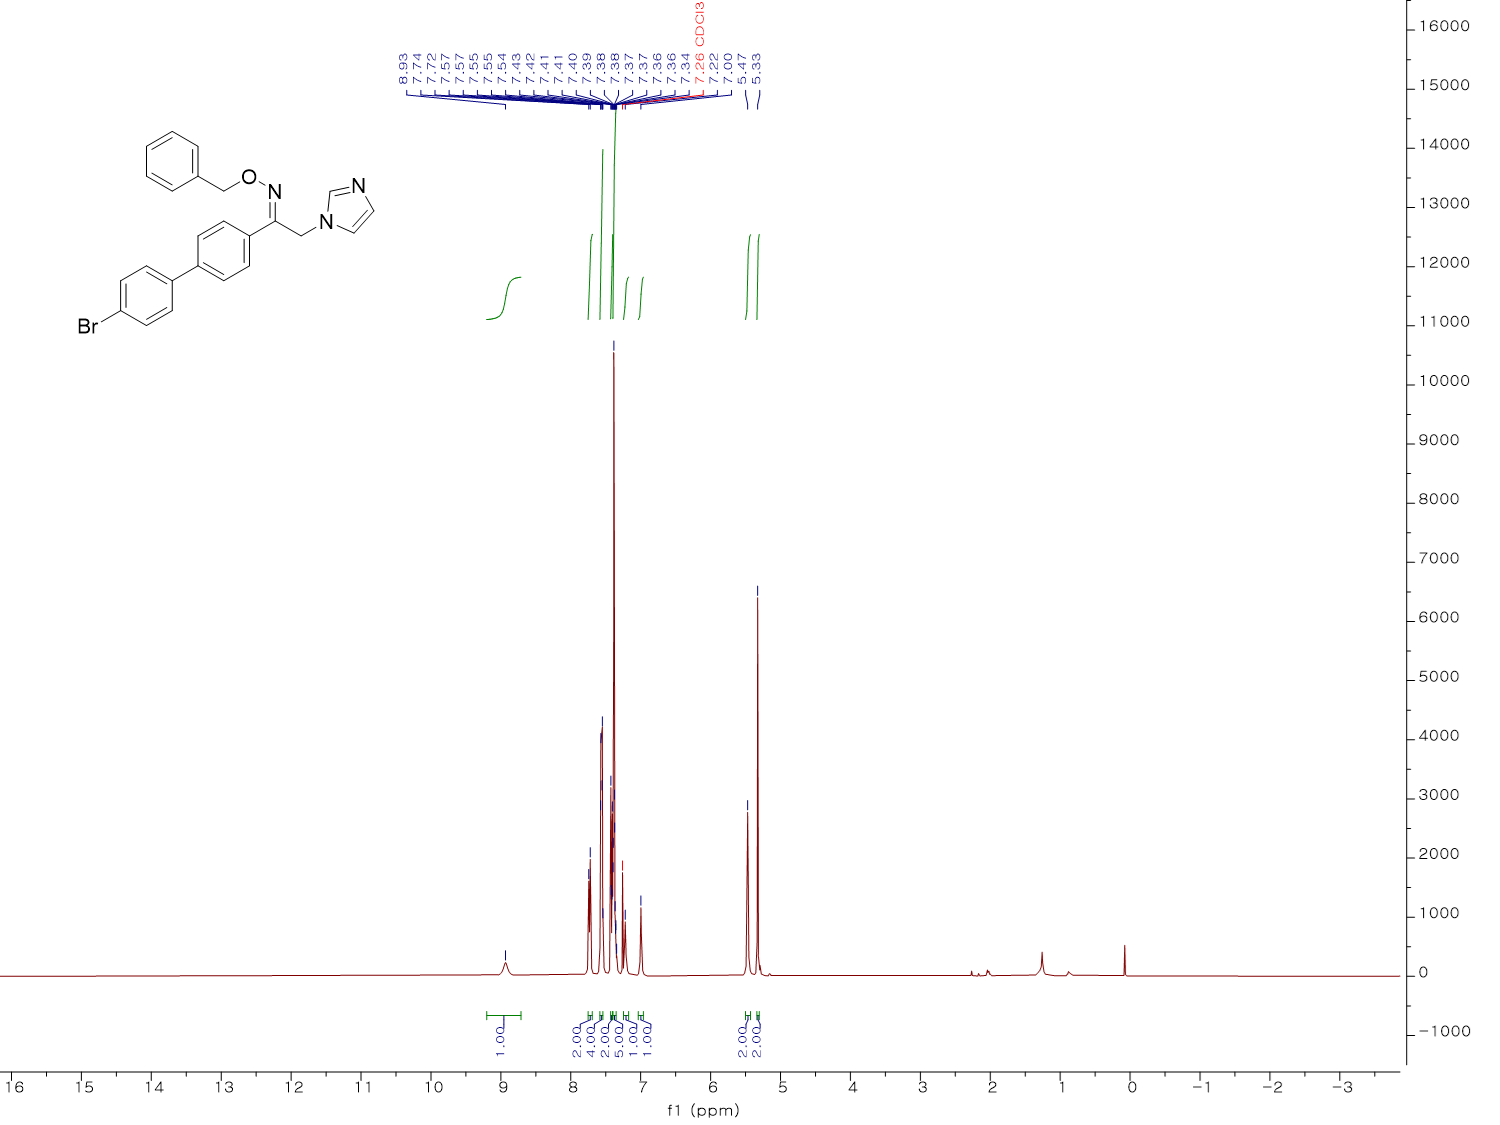
**

1H NMR spectrum (400 MHz, CDCl3) of **KH21**

**
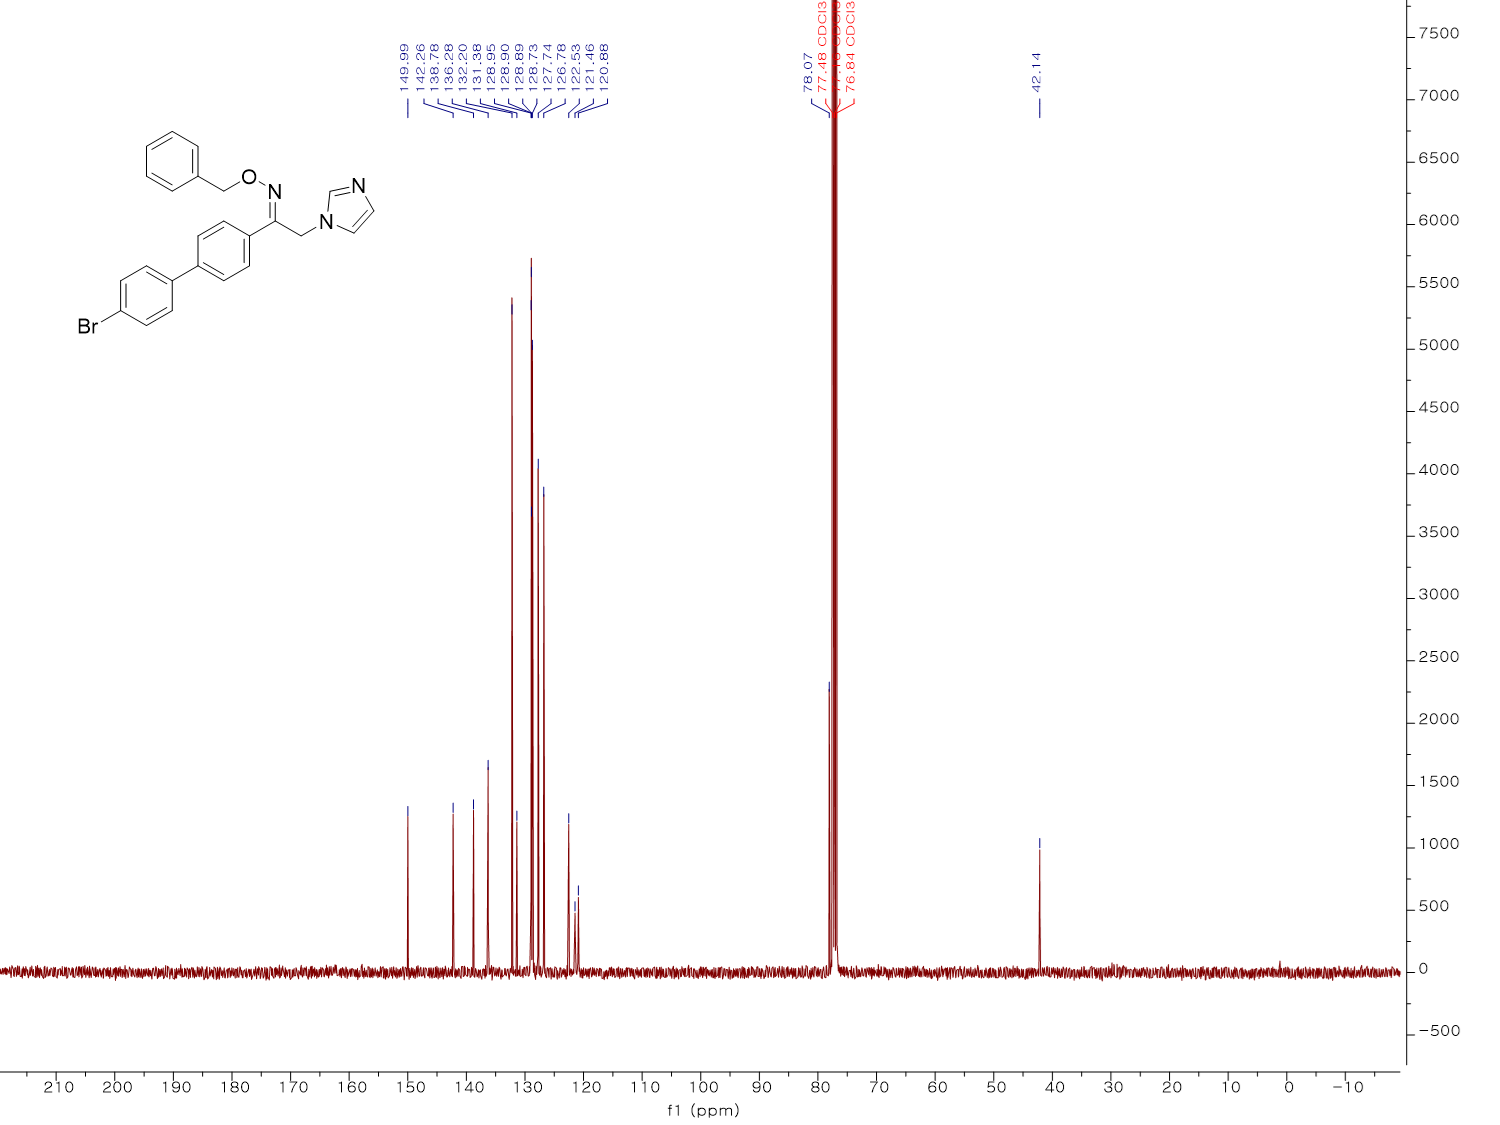
**

13C NMR spectrum (100 MHz, CDCl3) of **KH21**

**
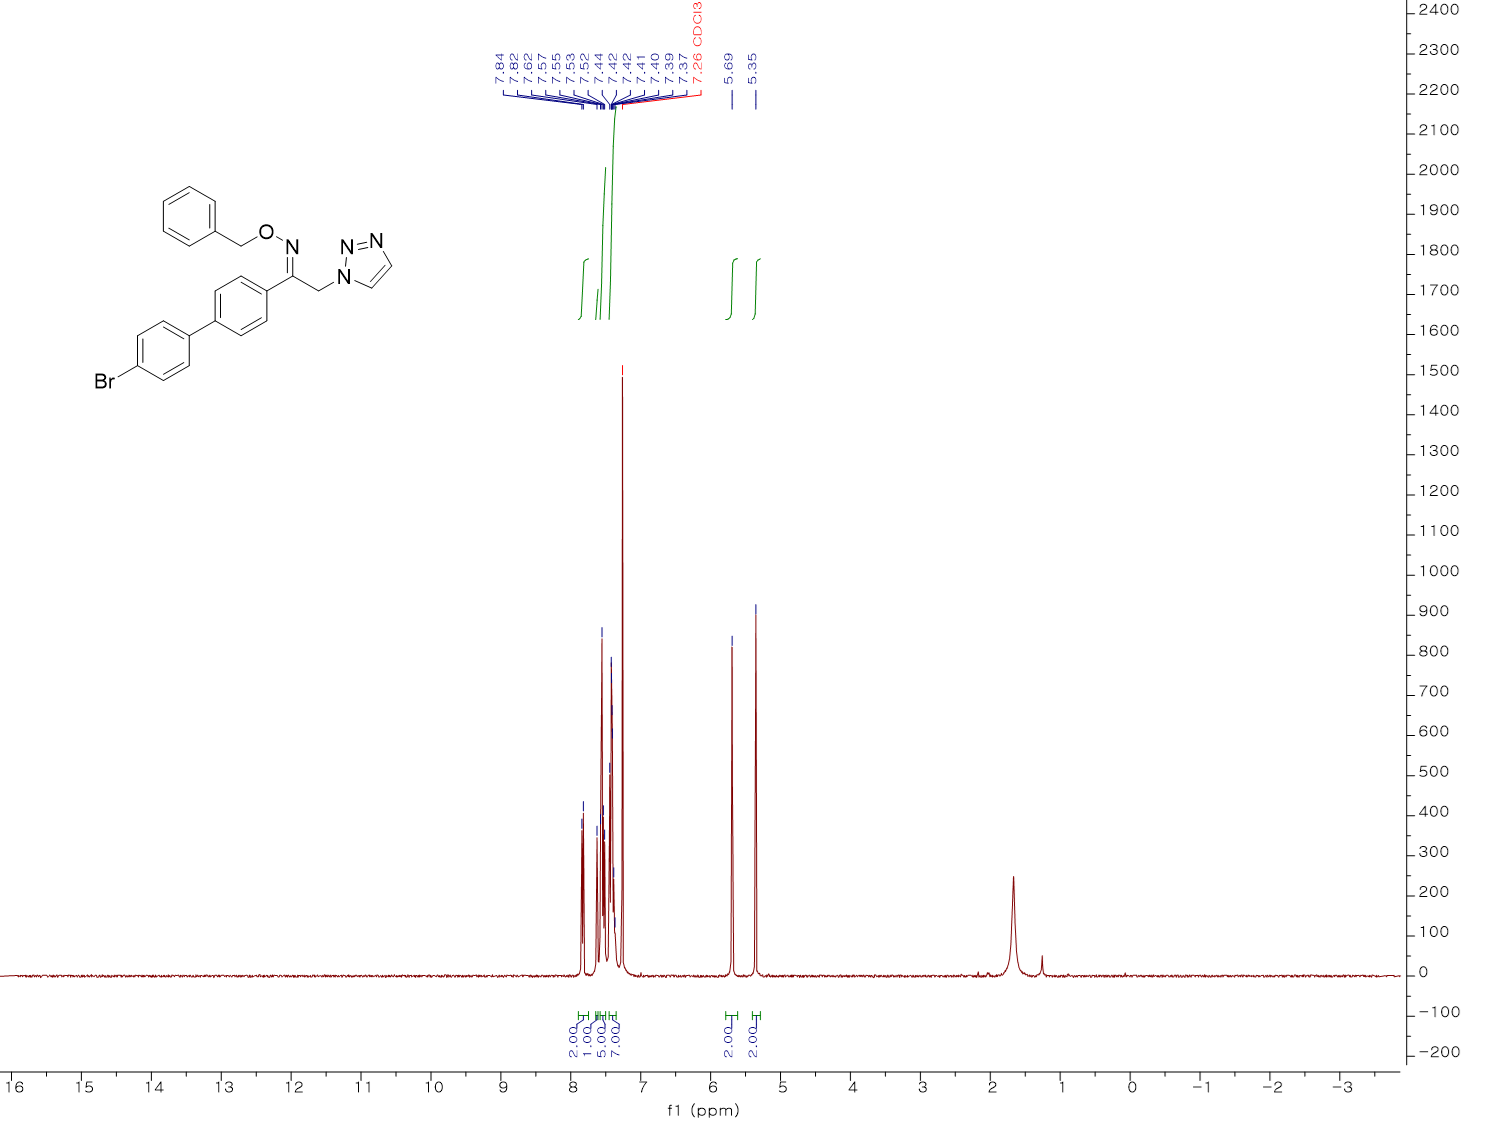
**

1H NMR spectrum (400 MHz, CDCl3) of **KH22**

**
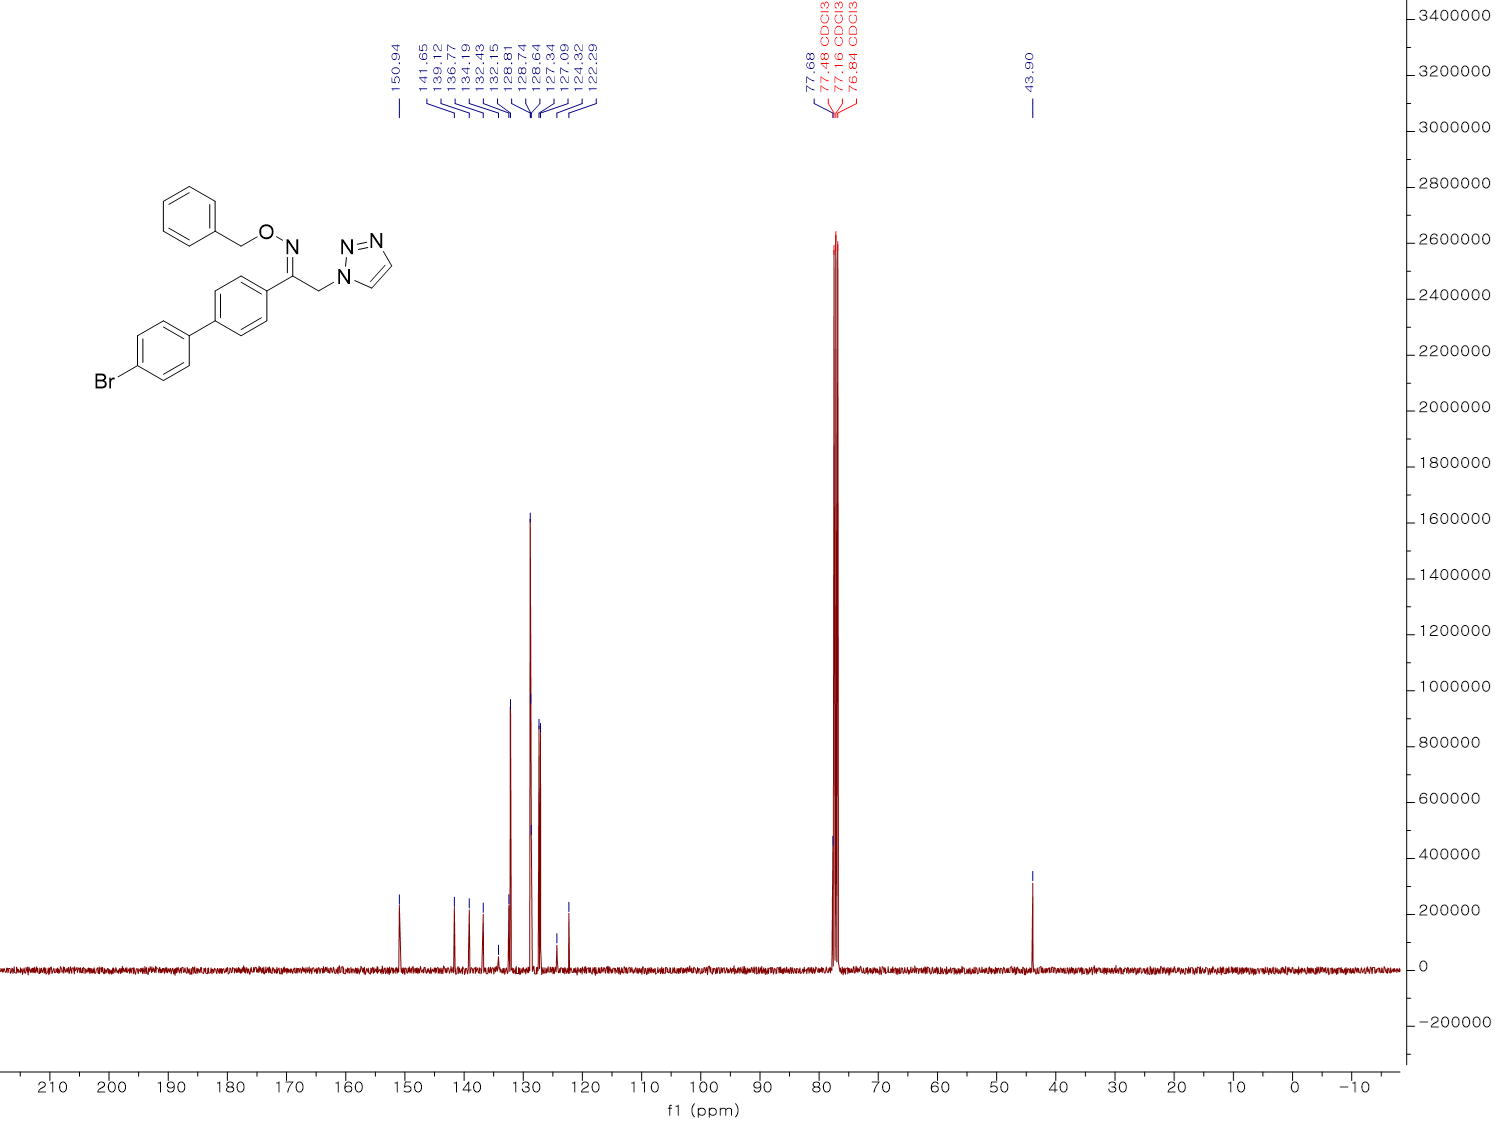
**

13C NMR spectrum (100 MHz, CDCl3) of **KH22**

**
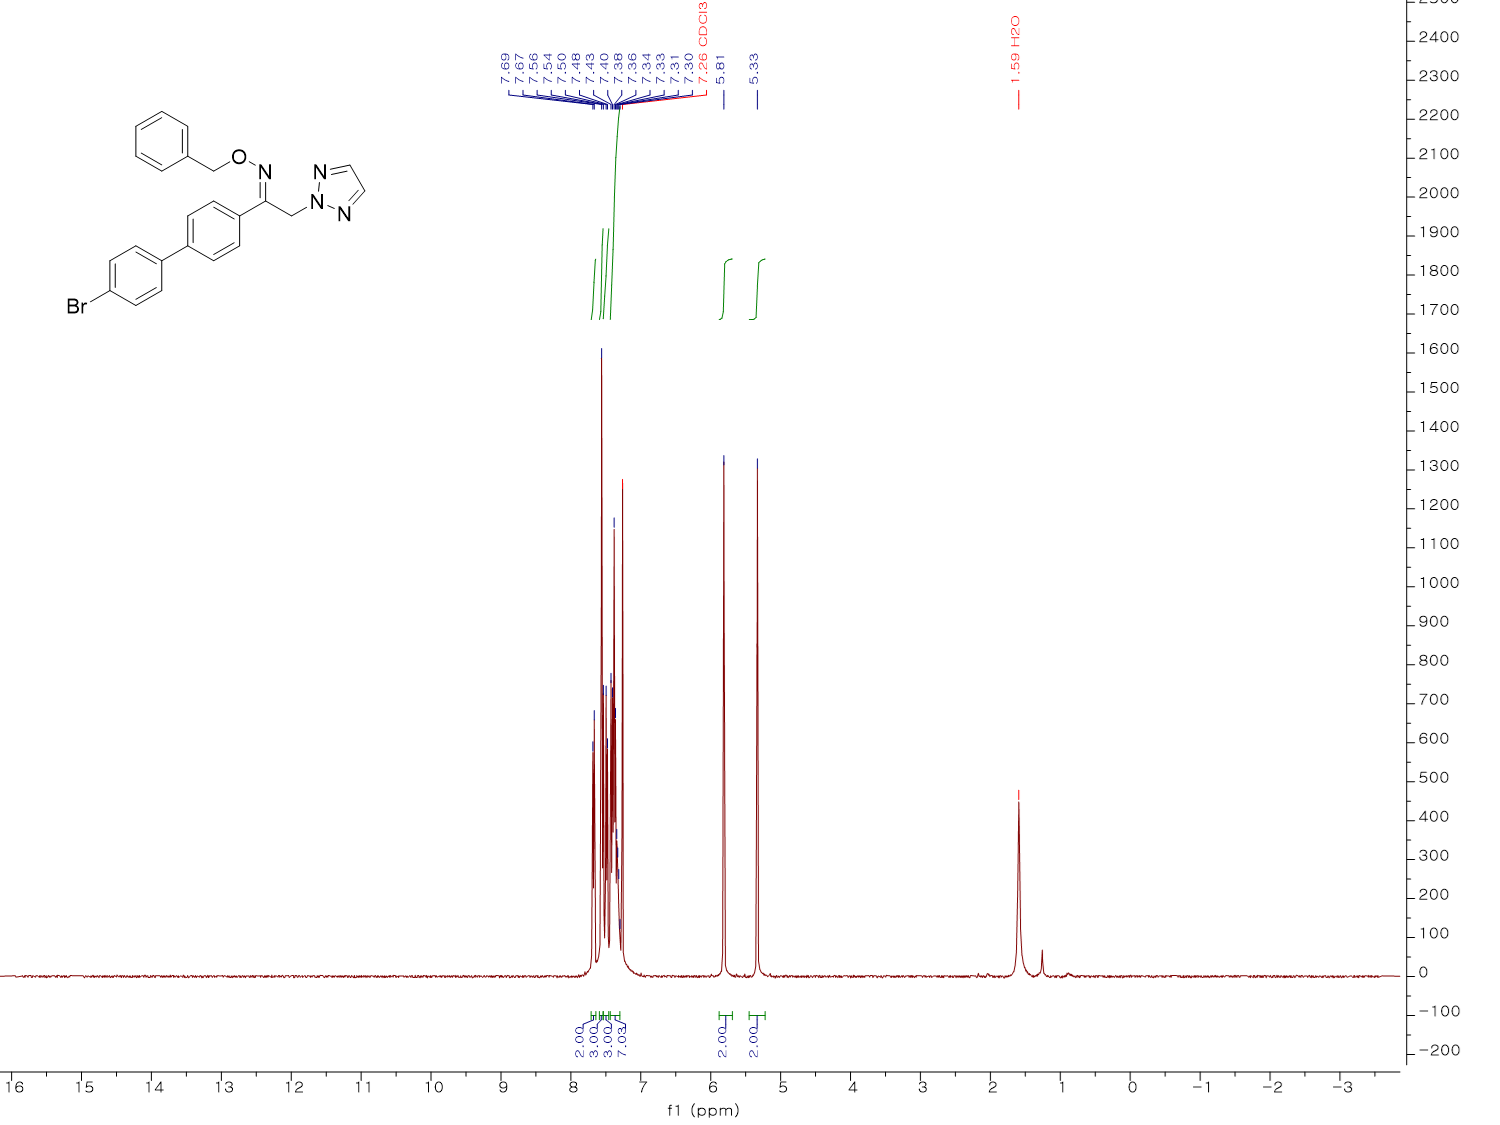
**

1H NMR spectrum (400 MHz, CDCl3) of **KH23**

**
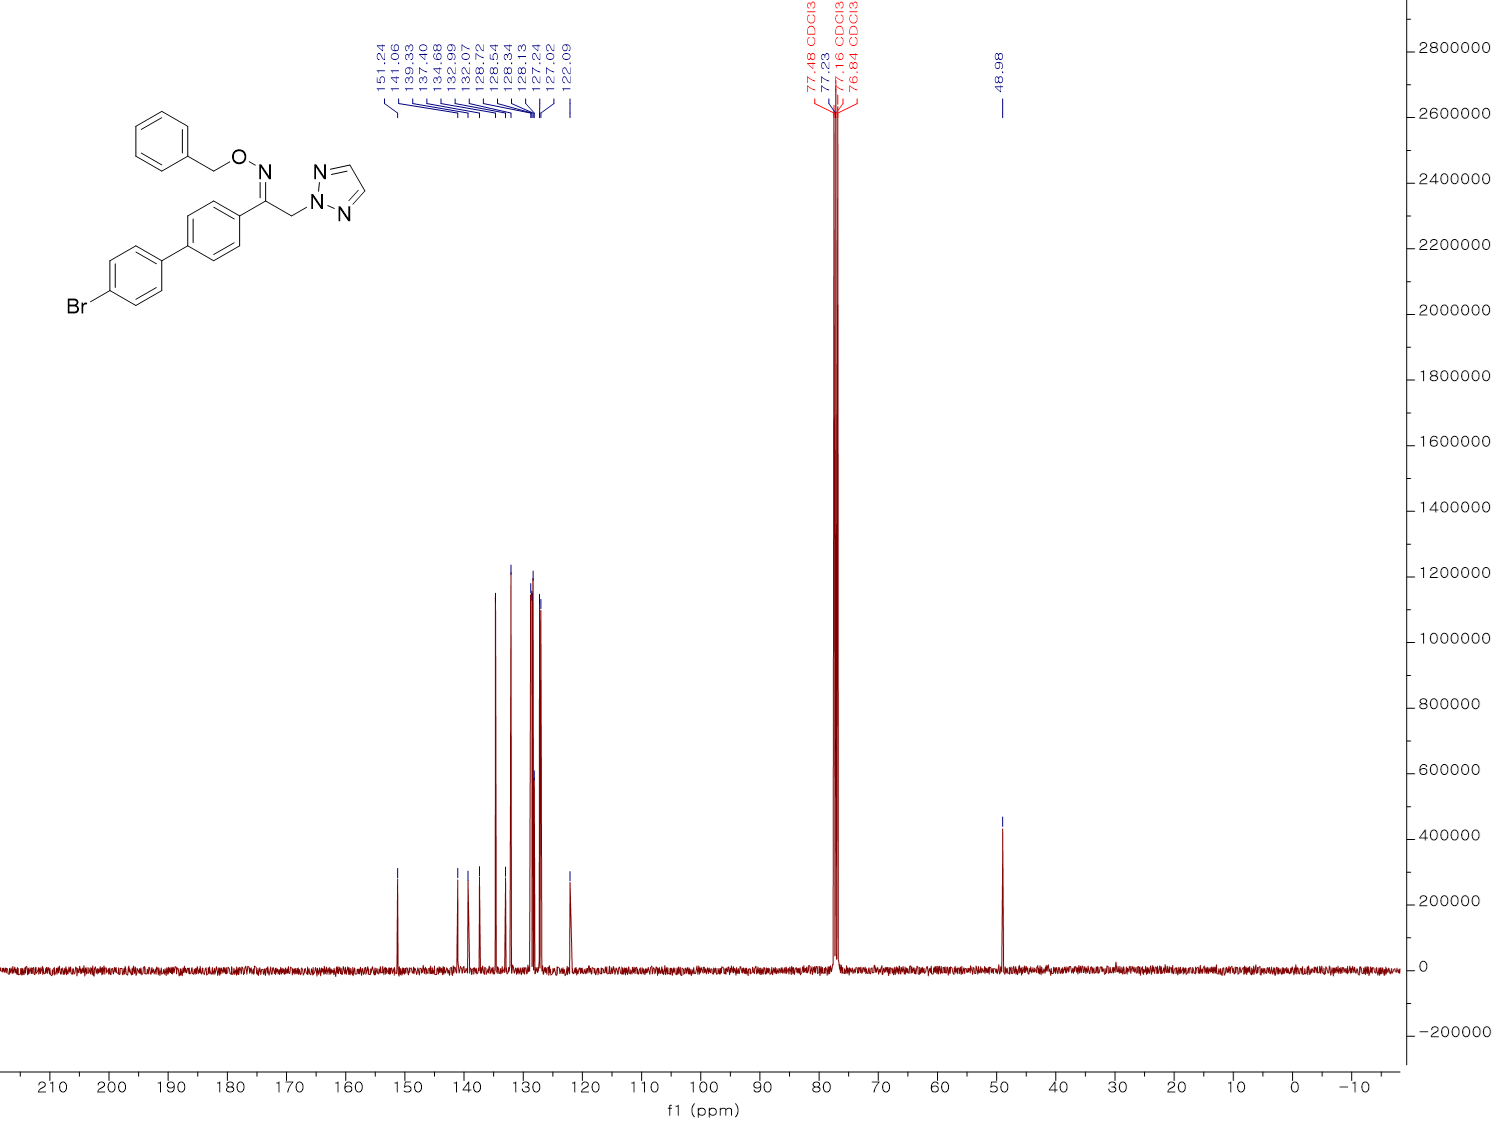
**

13C NMR spectrum (100 MHz, CDCl3) of **KH23**

**
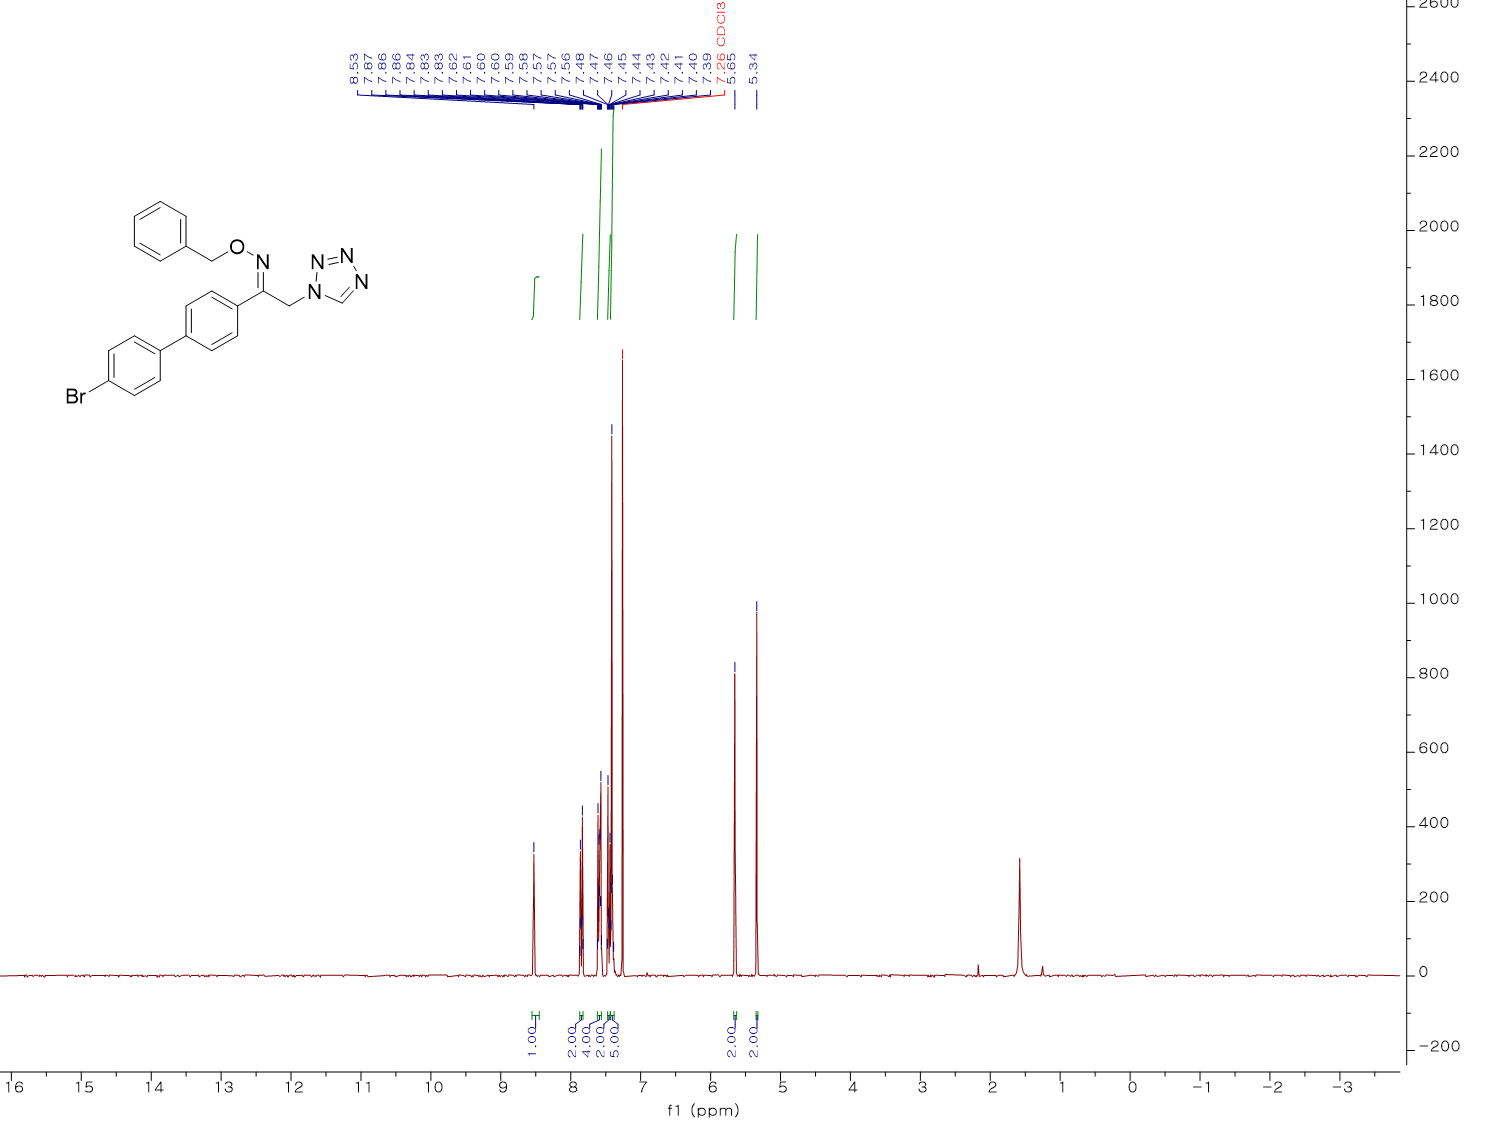
**

1H NMR spectrum (300 MHz, CDCl3) of **KH24**

**
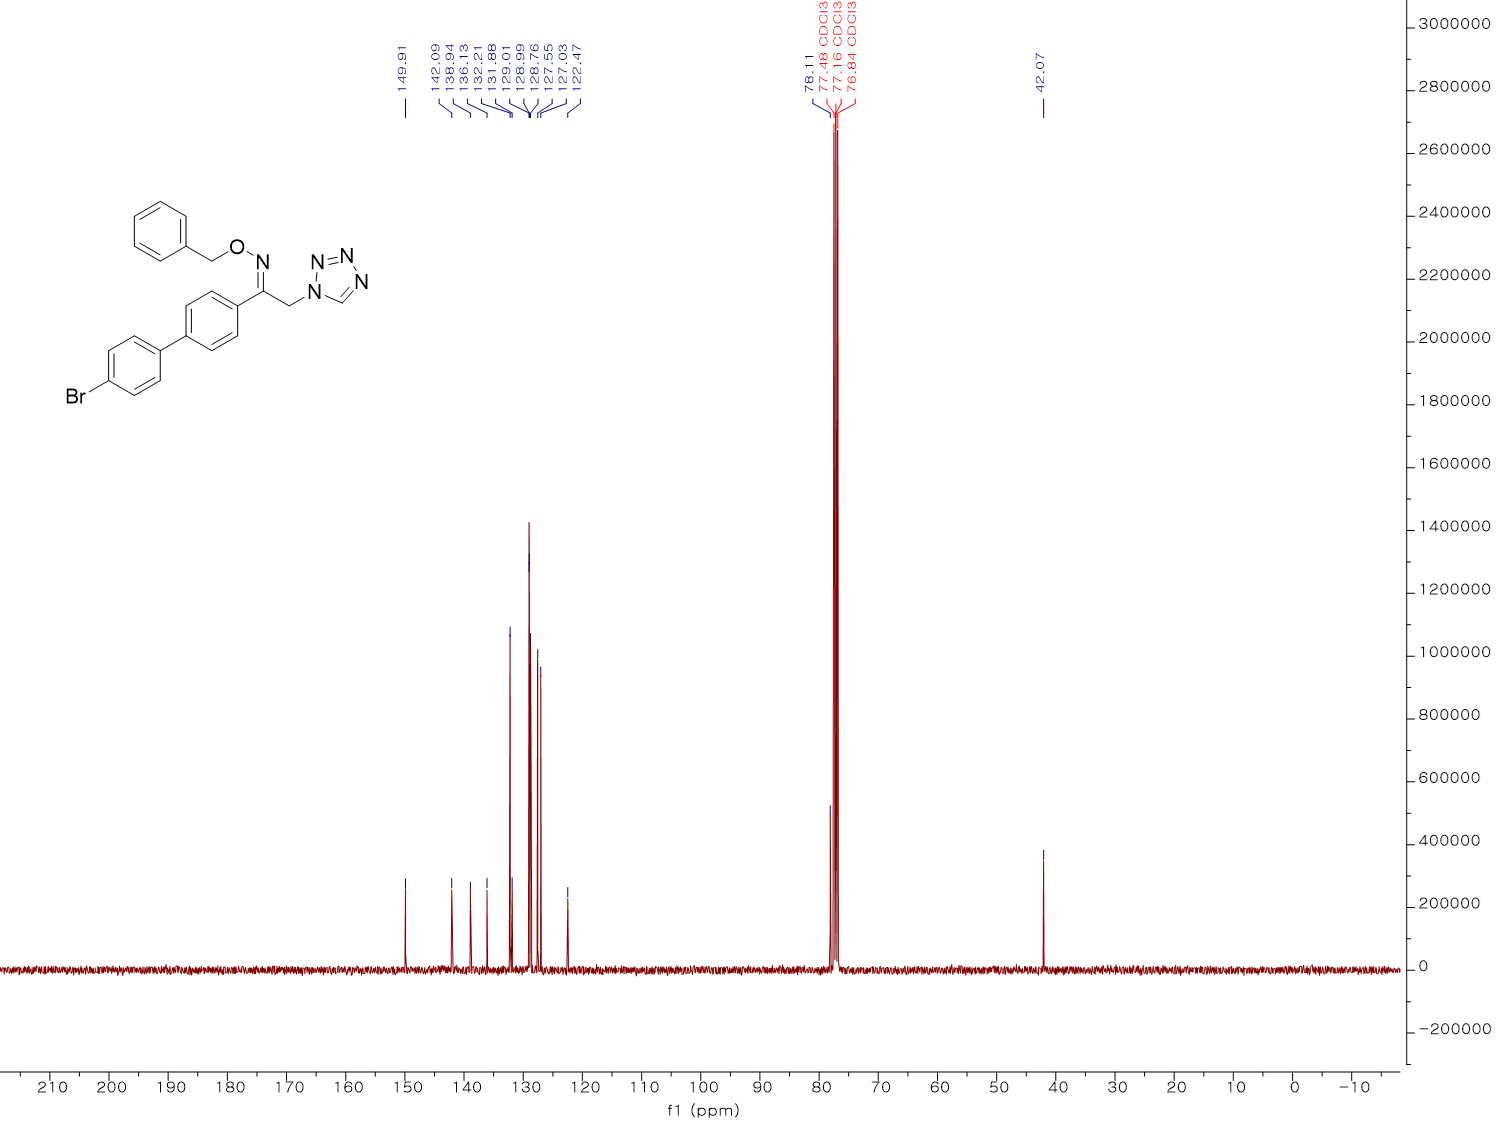
**

13C NMR spectrum (100 MHz, CDCl3) of **KH24**

**
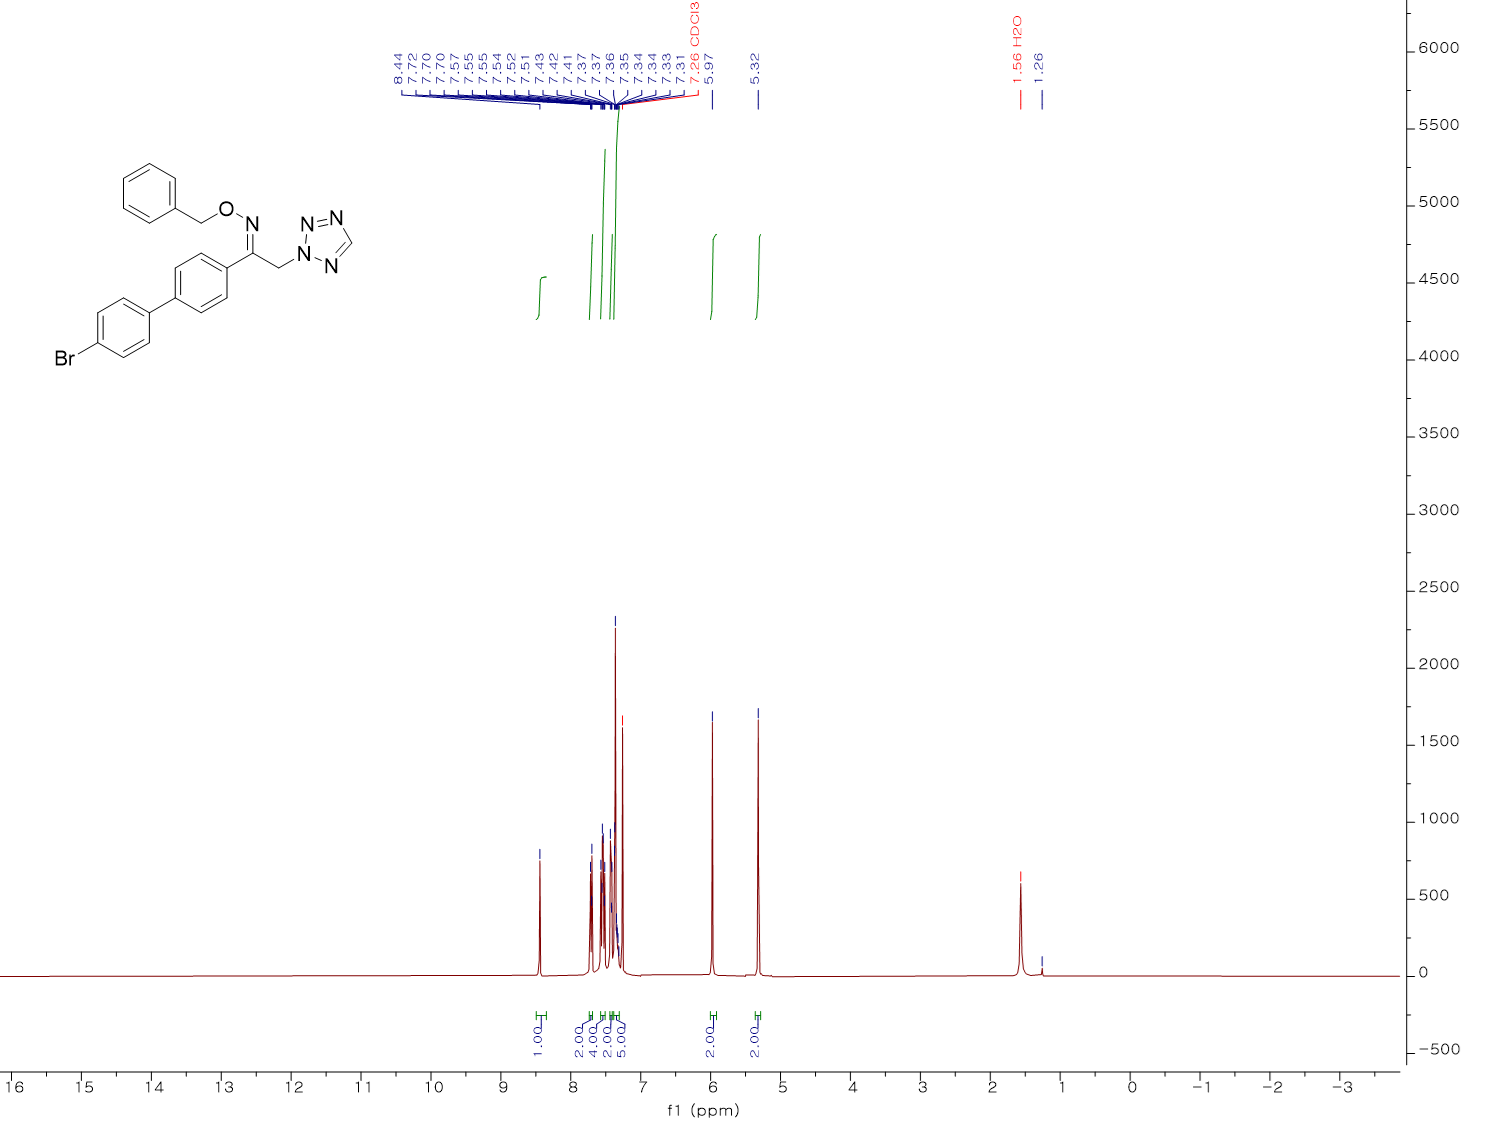
**

1H NMR spectrum (400 MHz, CDCl3) of **KH25**

**
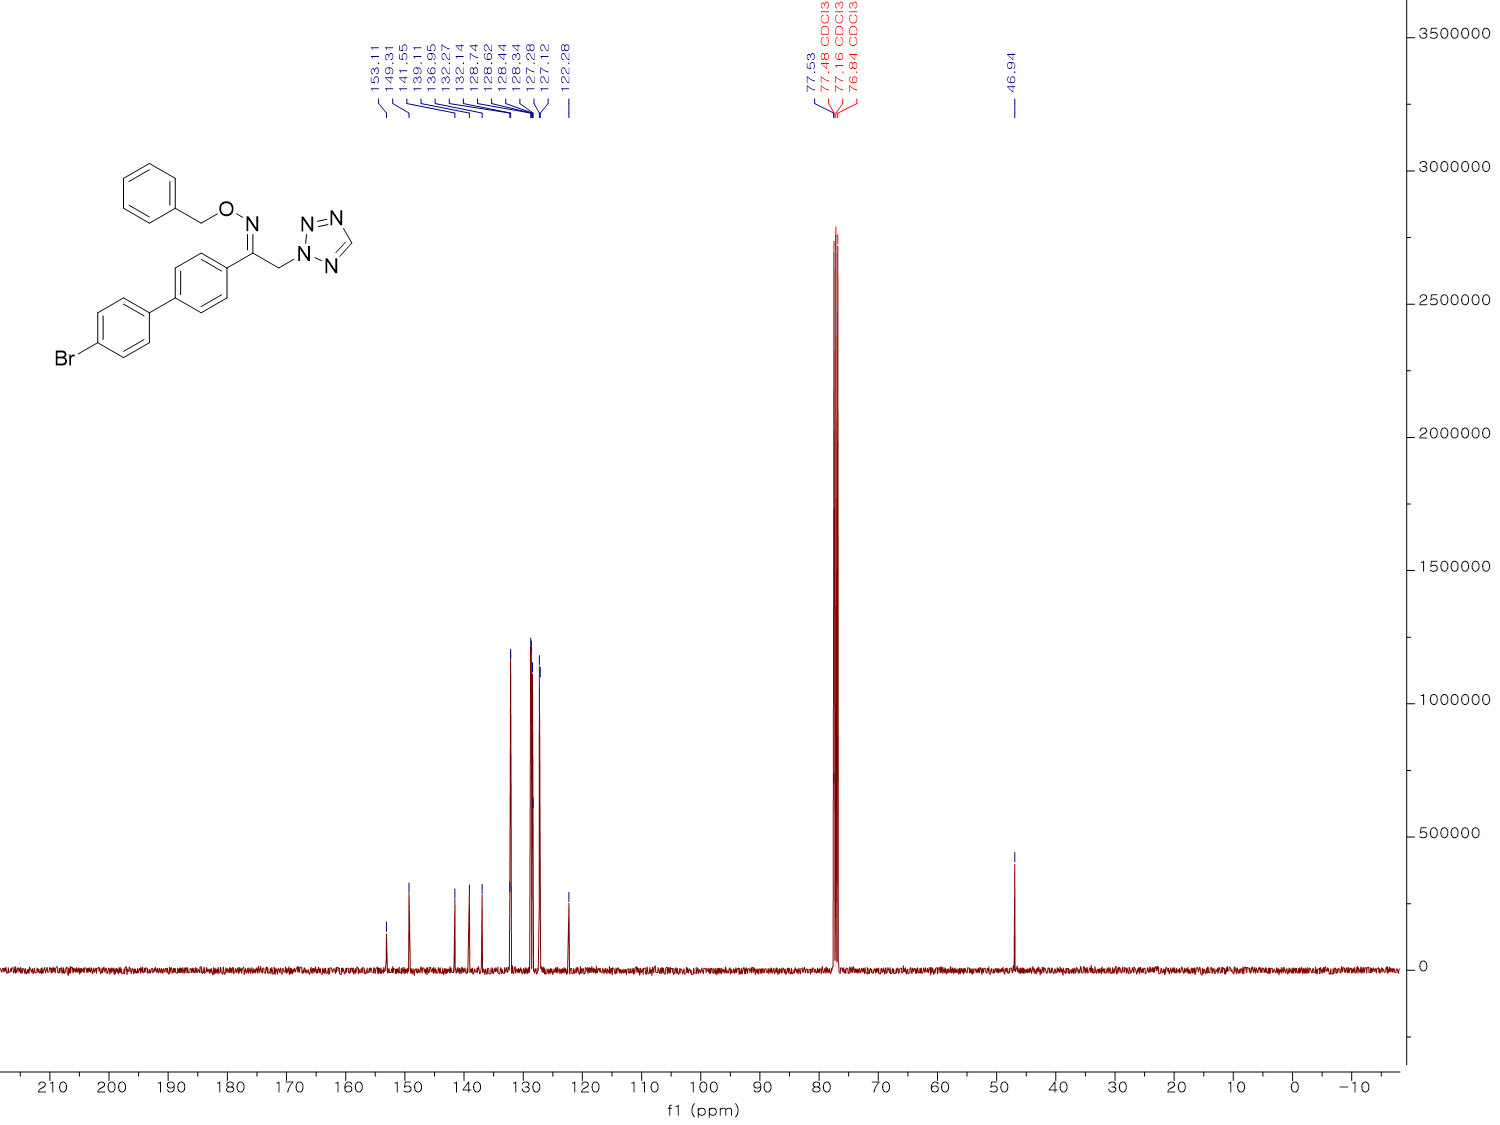
**

13C NMR spectrum (100 MHz, CDCl3) of **KH25**

**
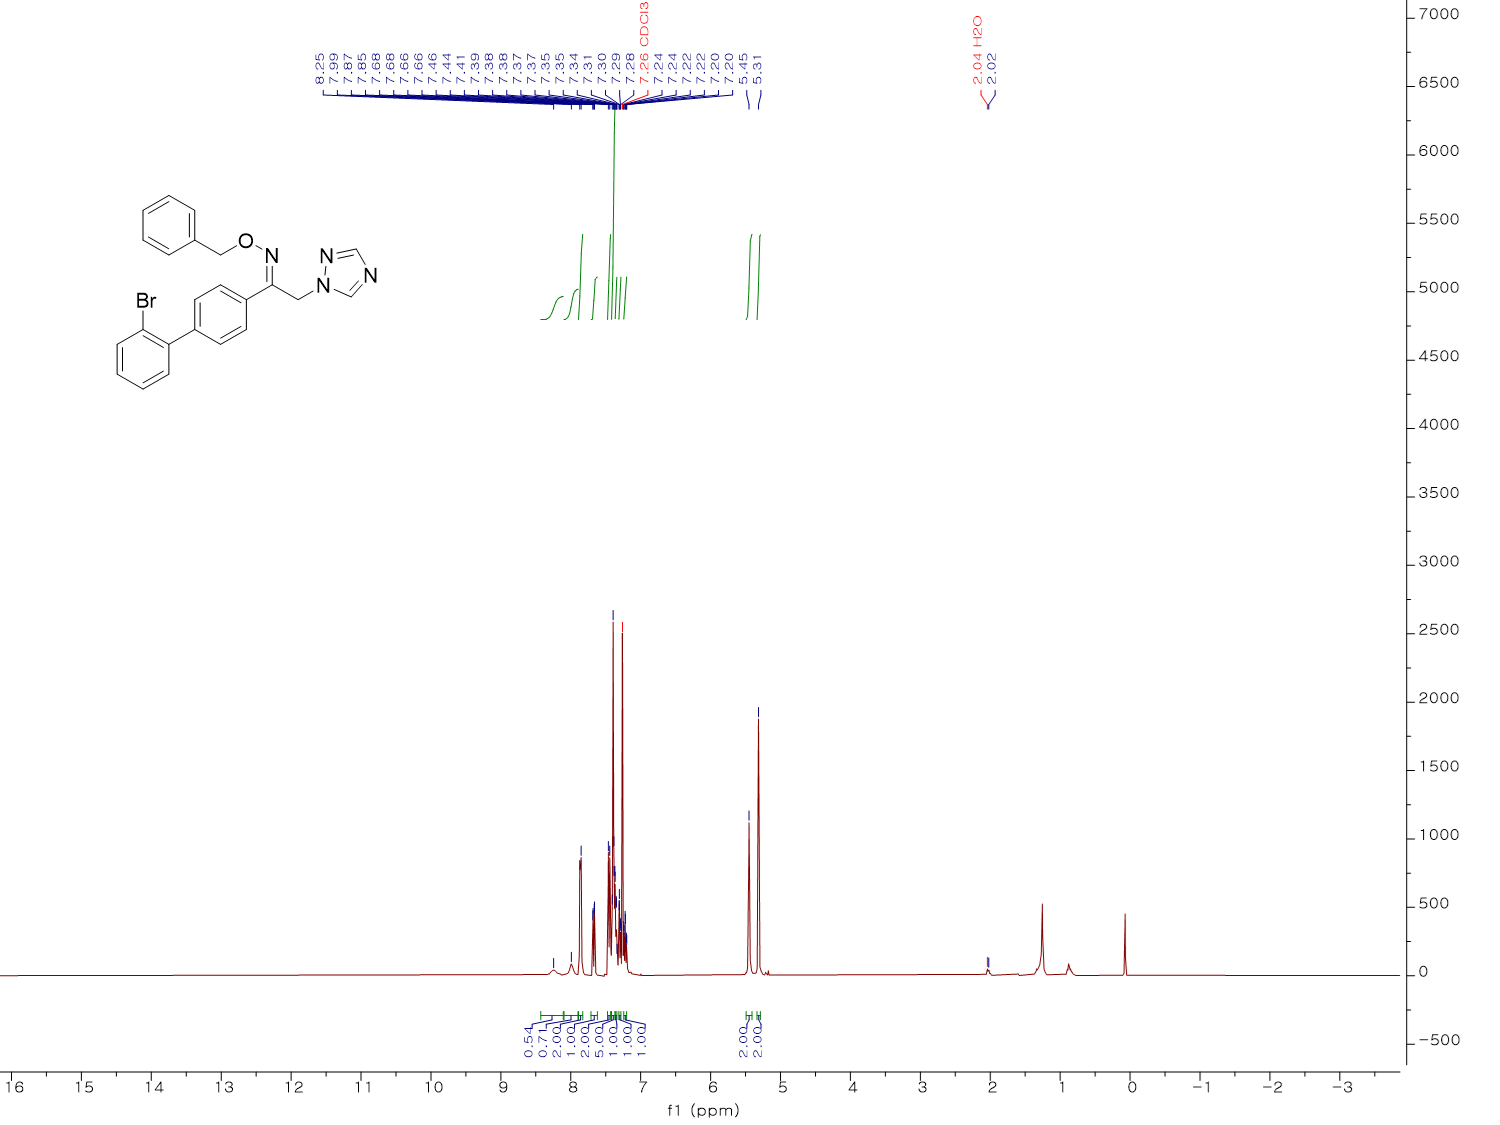
**

1H NMR spectrum (400 MHz, CDCl3) of **KH26**

**
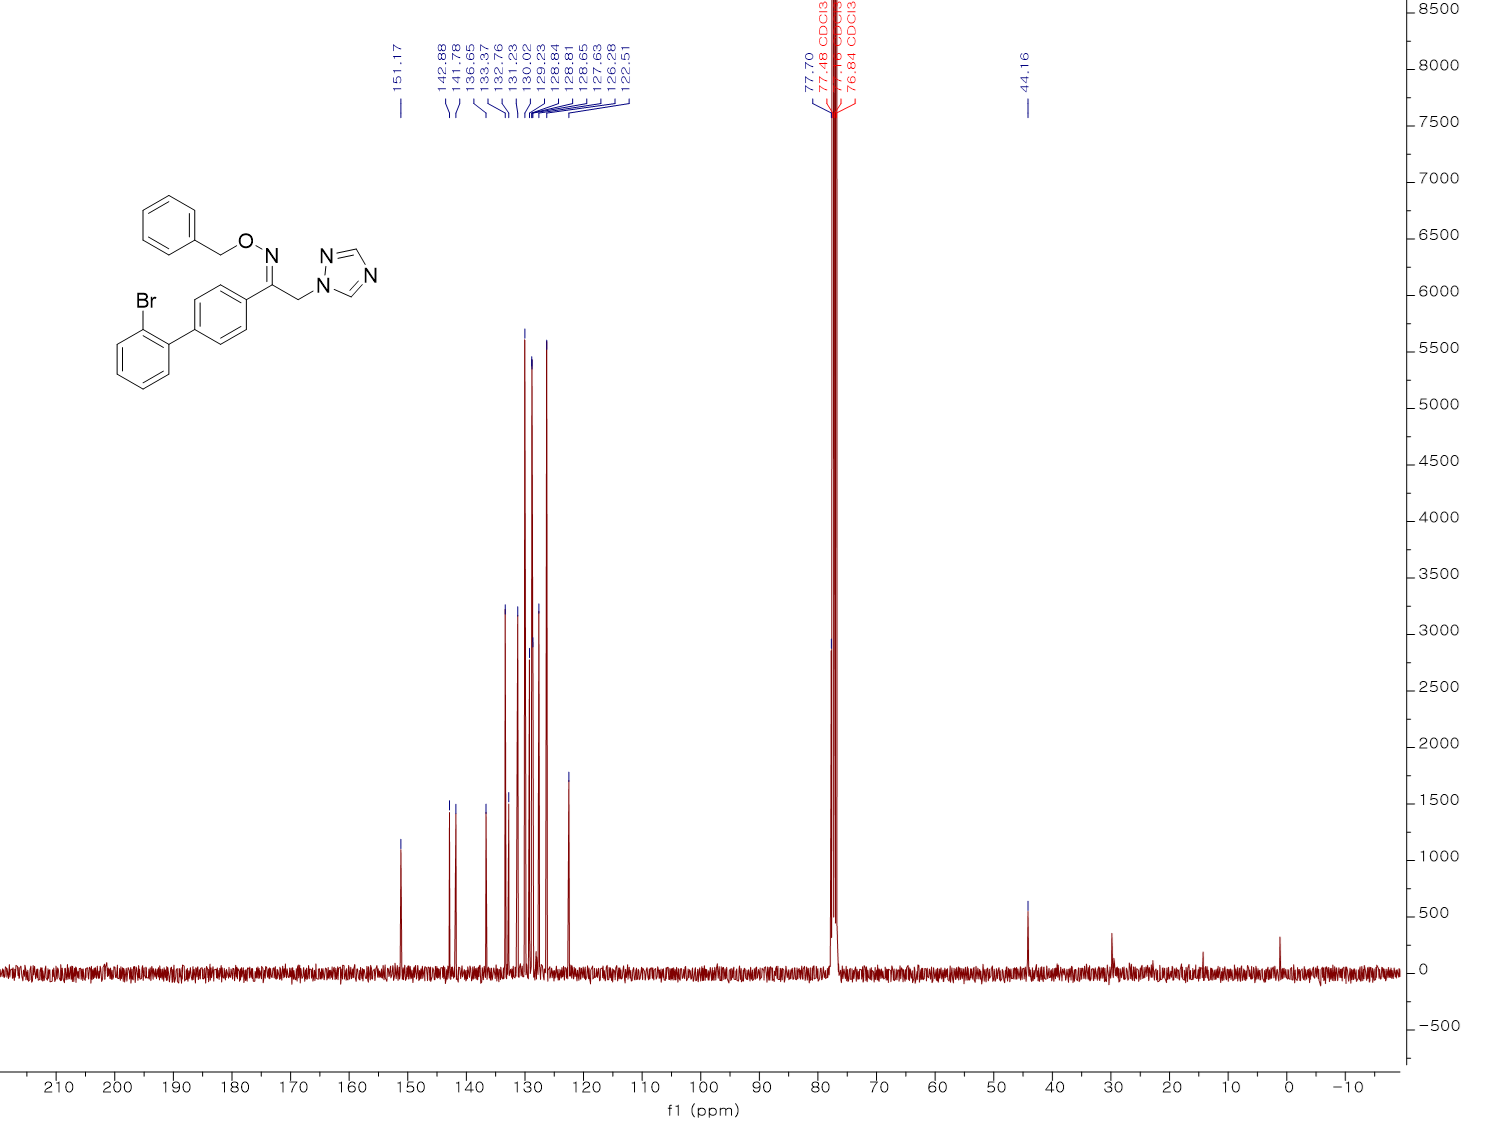
**

13C NMR spectrum (100 MHz, CDCl3) of **KH26**

**
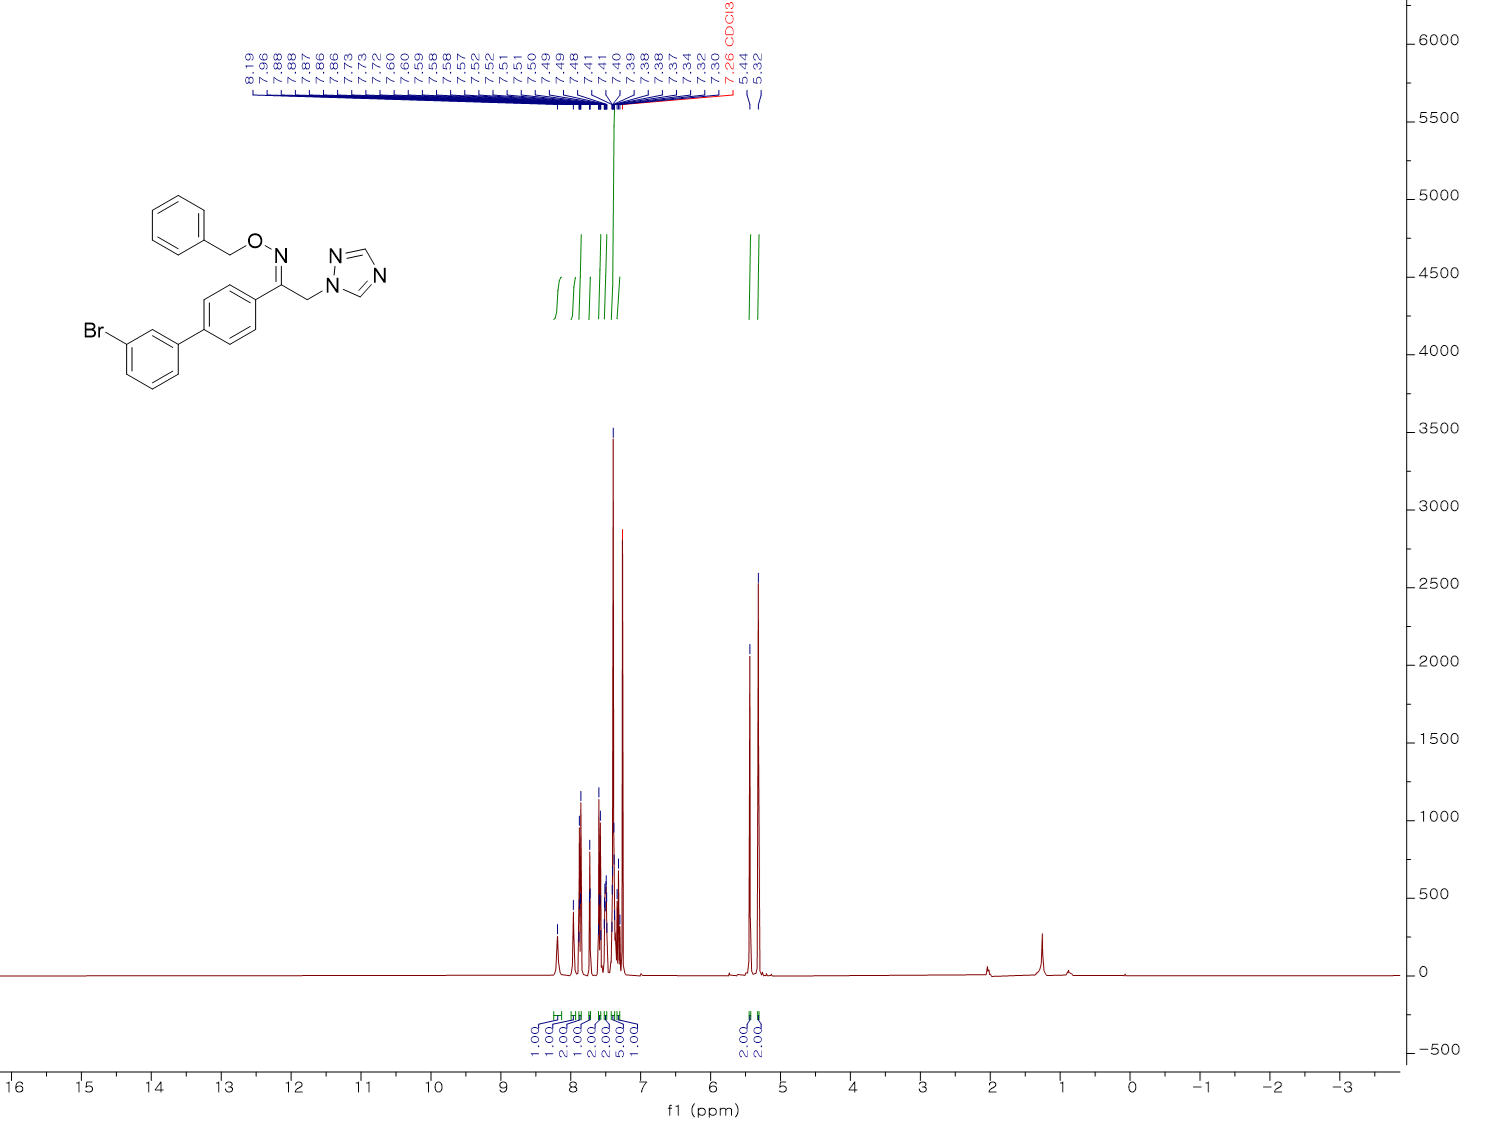
**

1H NMR spectrum (400 MHz, CDCl3) of **KH27**

**
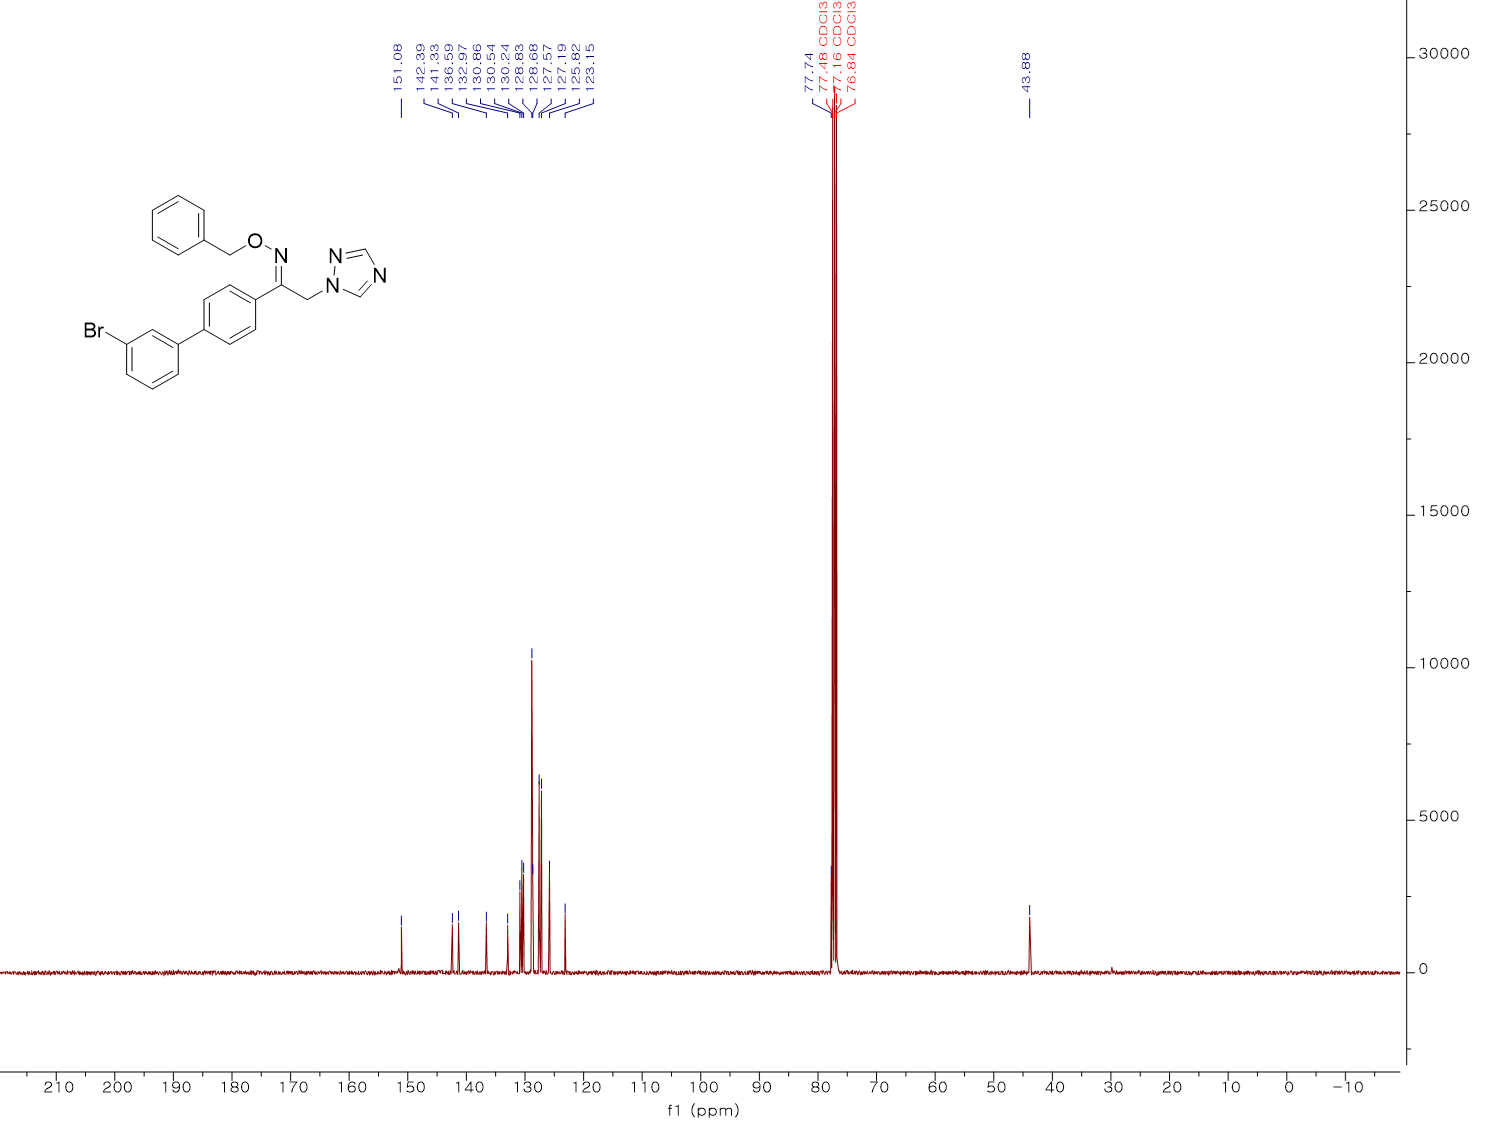
**

13C NMR spectrum (100 MHz, CDCl3) of **KH27**

**
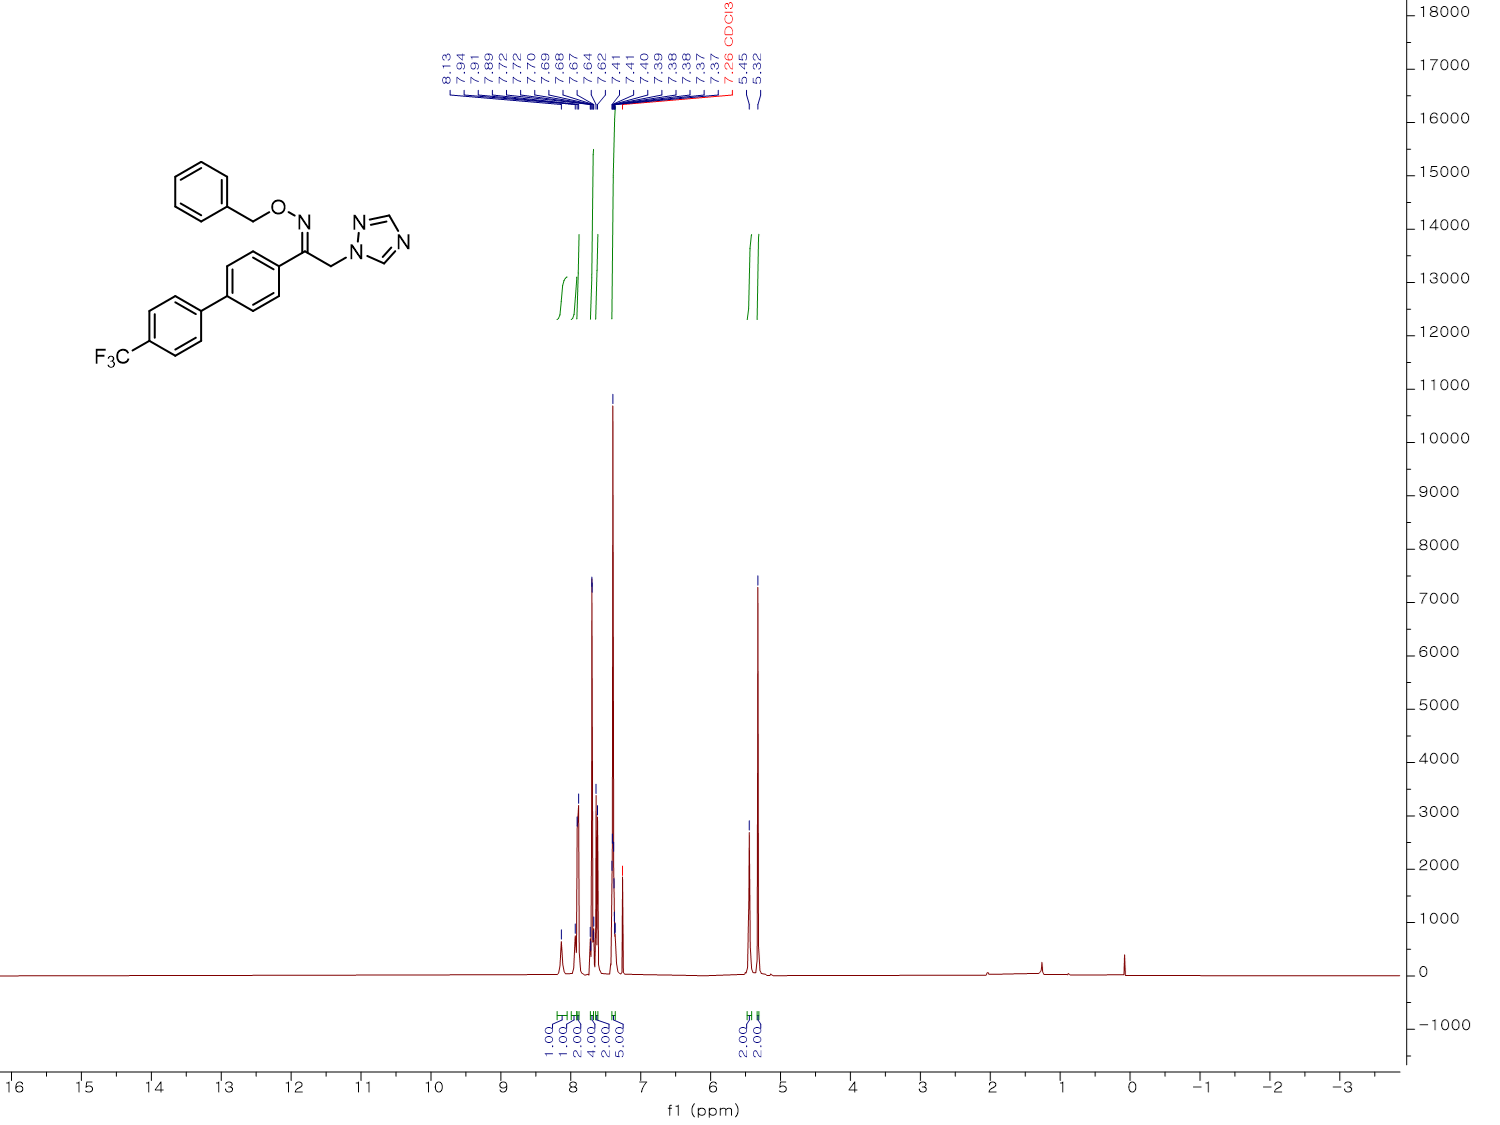
**

1H NMR spectrum (400 MHz, CDCl3) of **KH28**

**
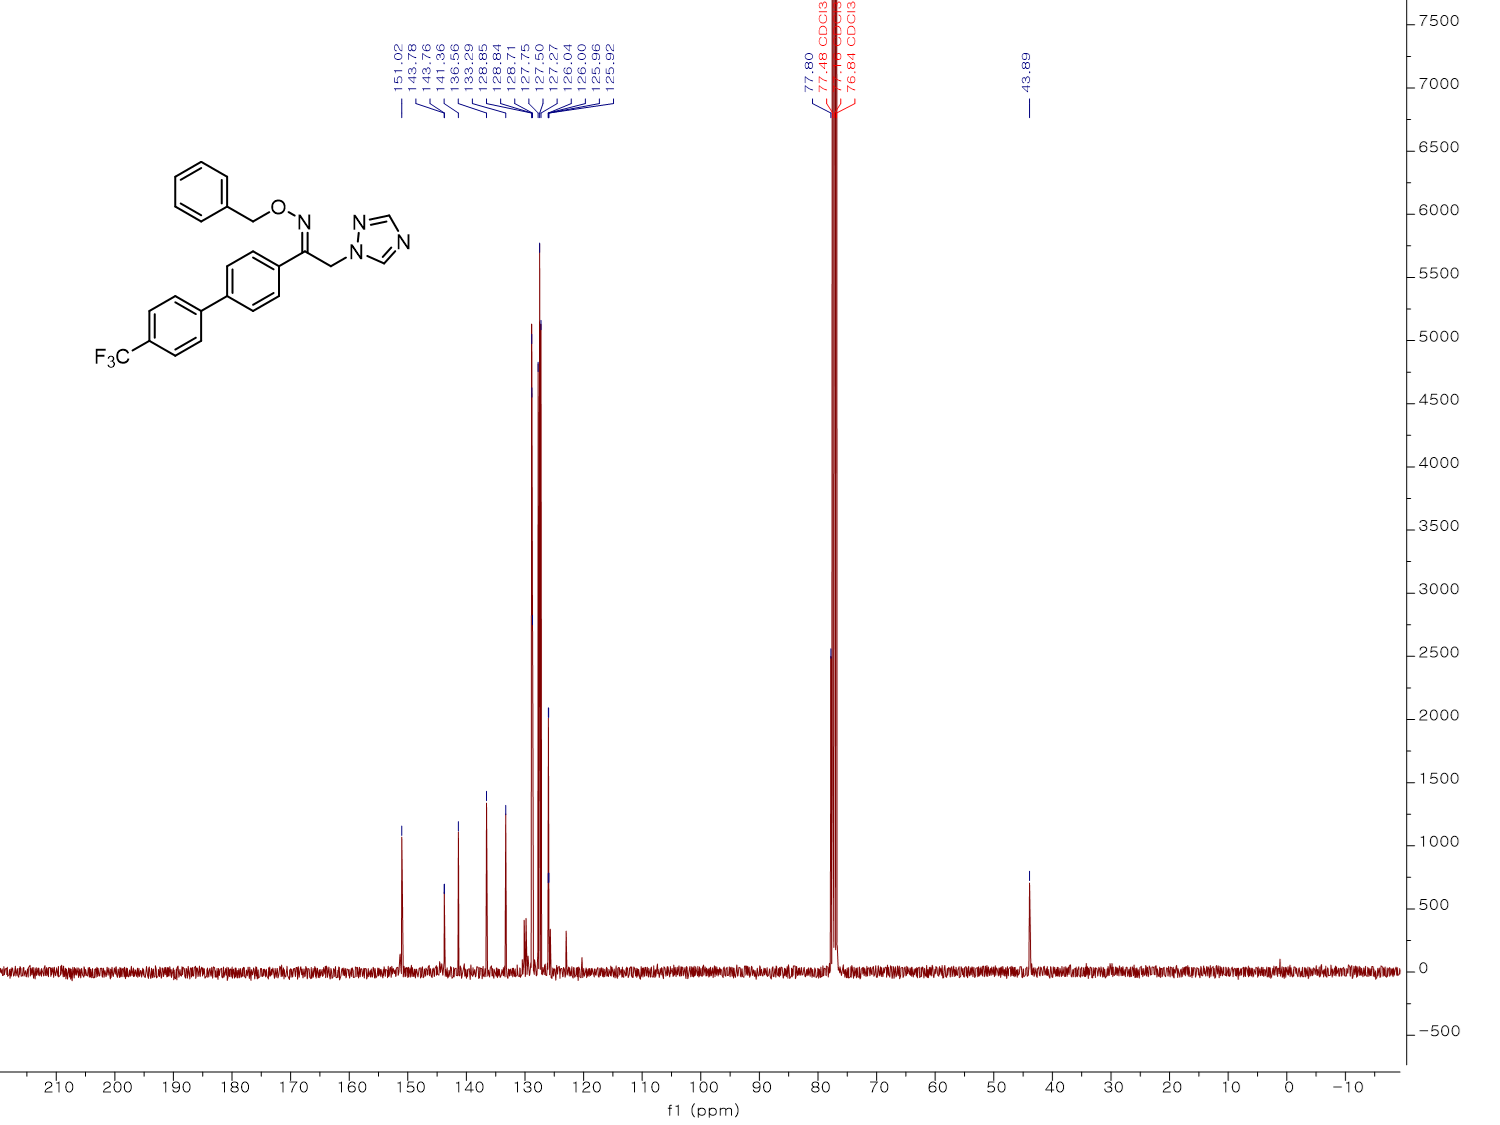
**

13C NMR spectrum (100 MHz, CDCl3) of **KH28**

**
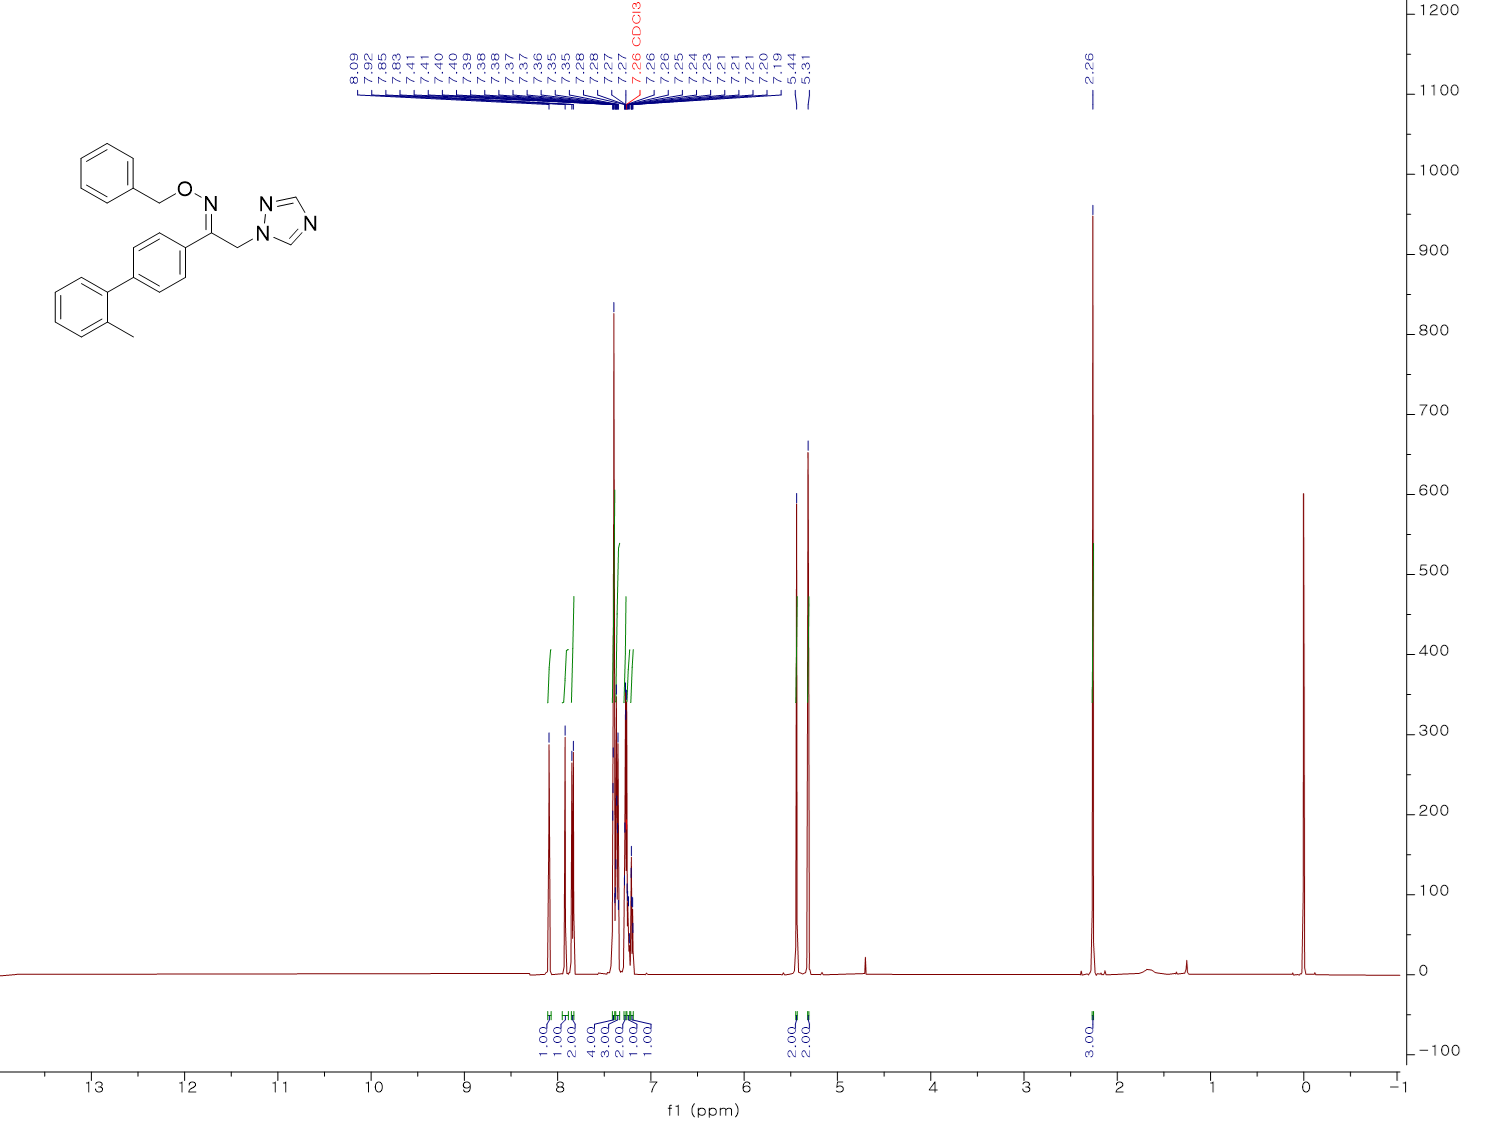
**

1H NMR spectrum (500 MHz, CDCl3) of **KH29**

**
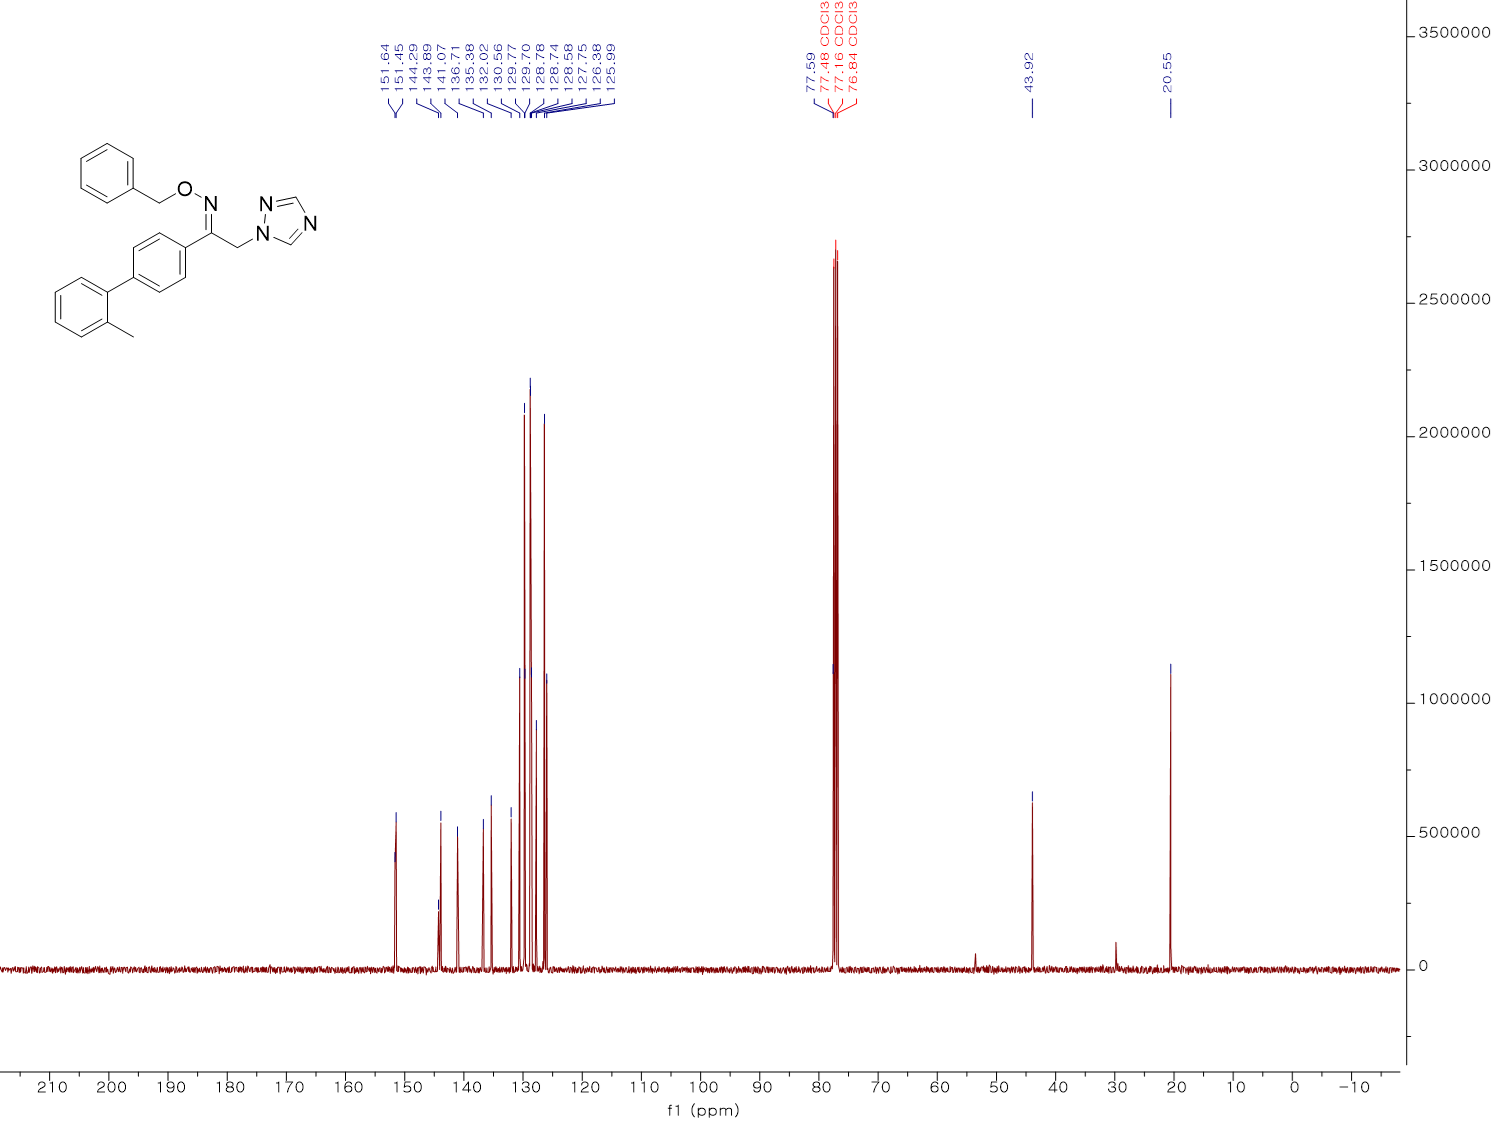
**

13C NMR spectrum (100 MHz, CDCl3) of **KH29**

**
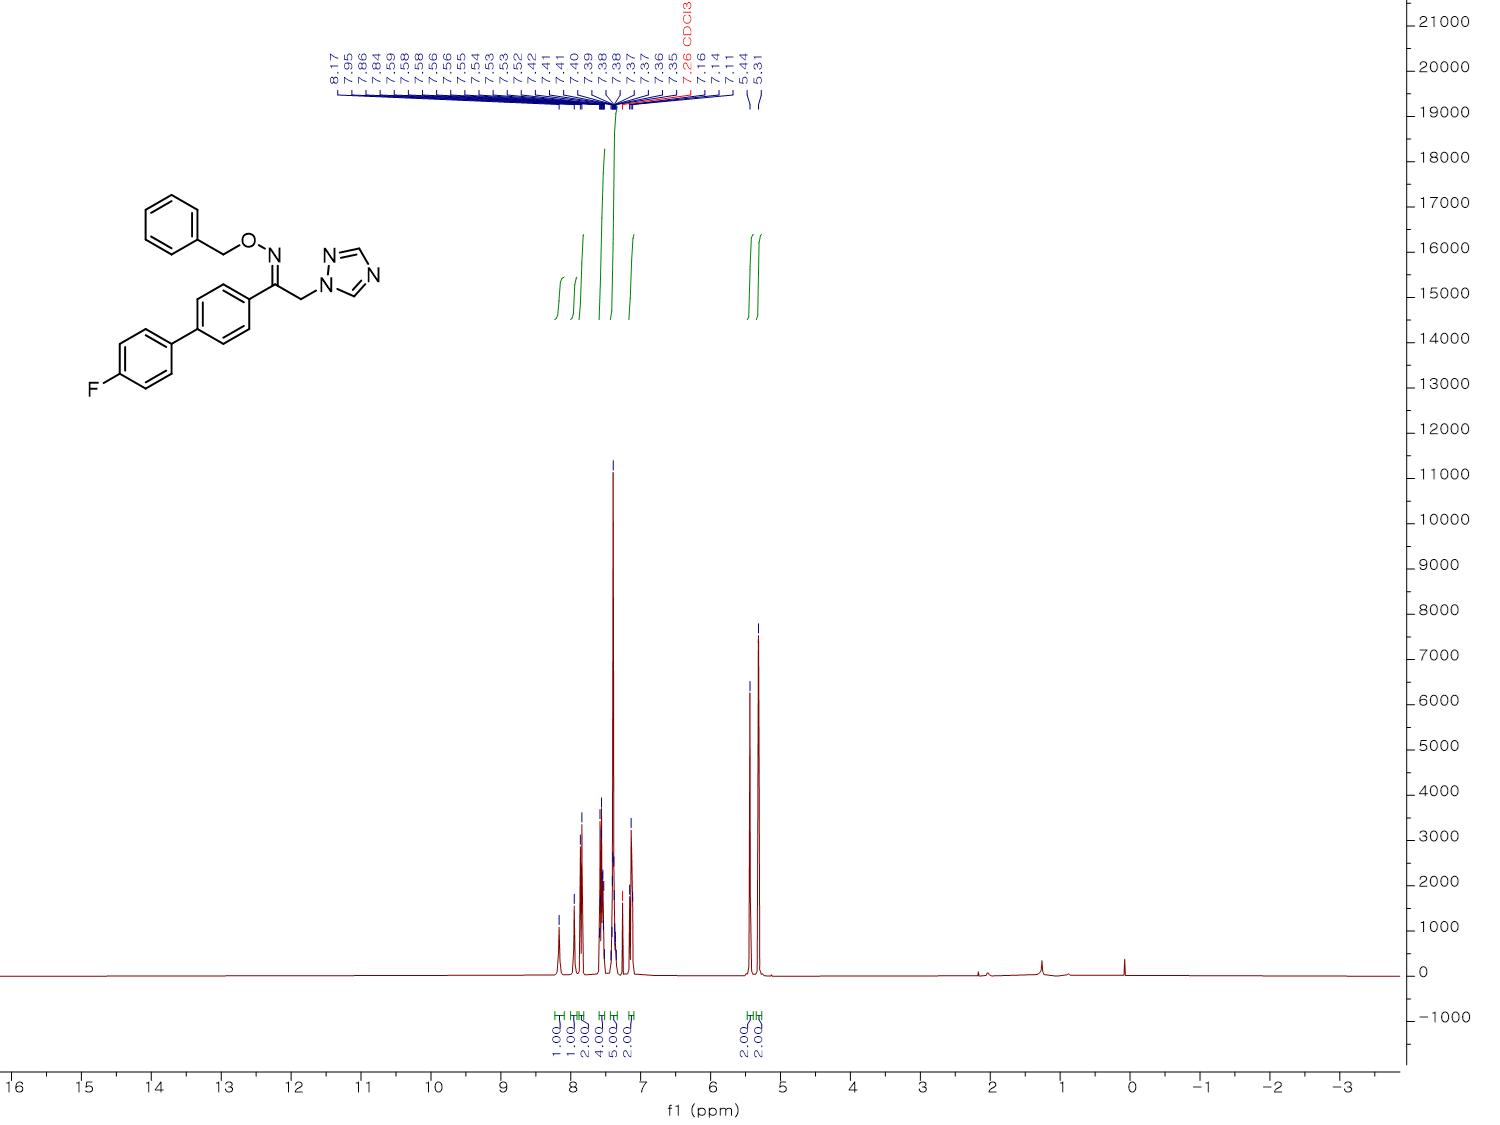
**

1H NMR spectrum (400 MHz, CDCl3) of **KH30**

**
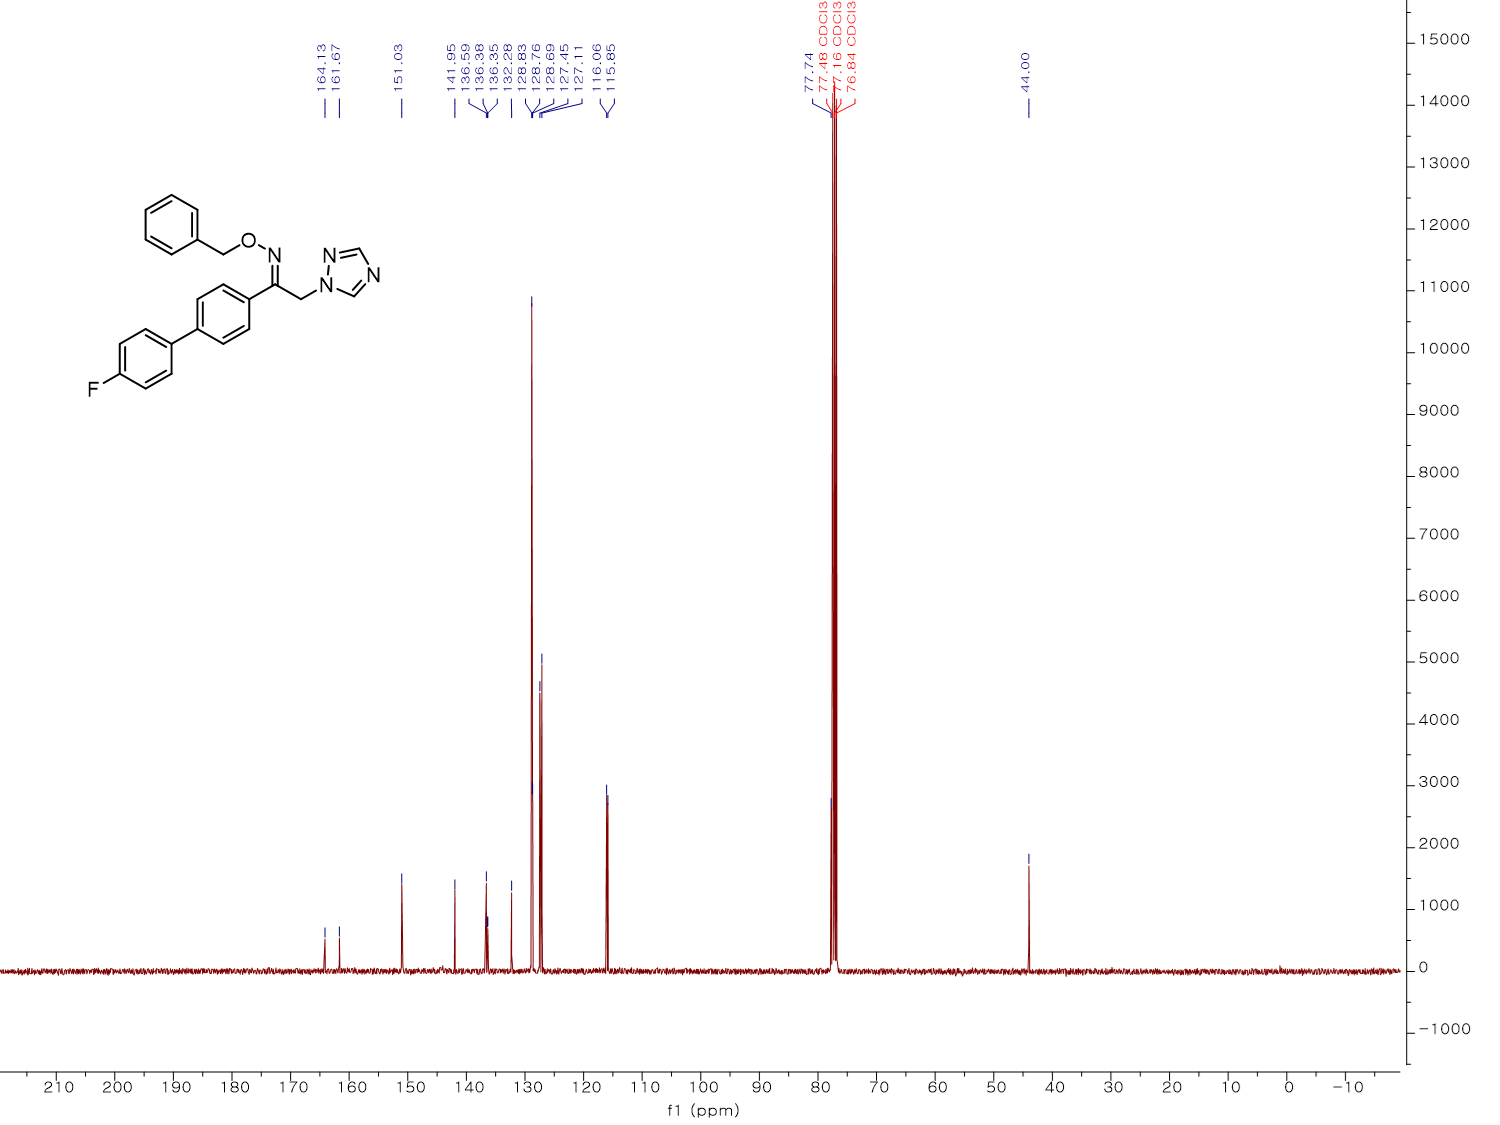
**

13C NMR spectrum (100 MHz, CDCl3) of **KH30**

**
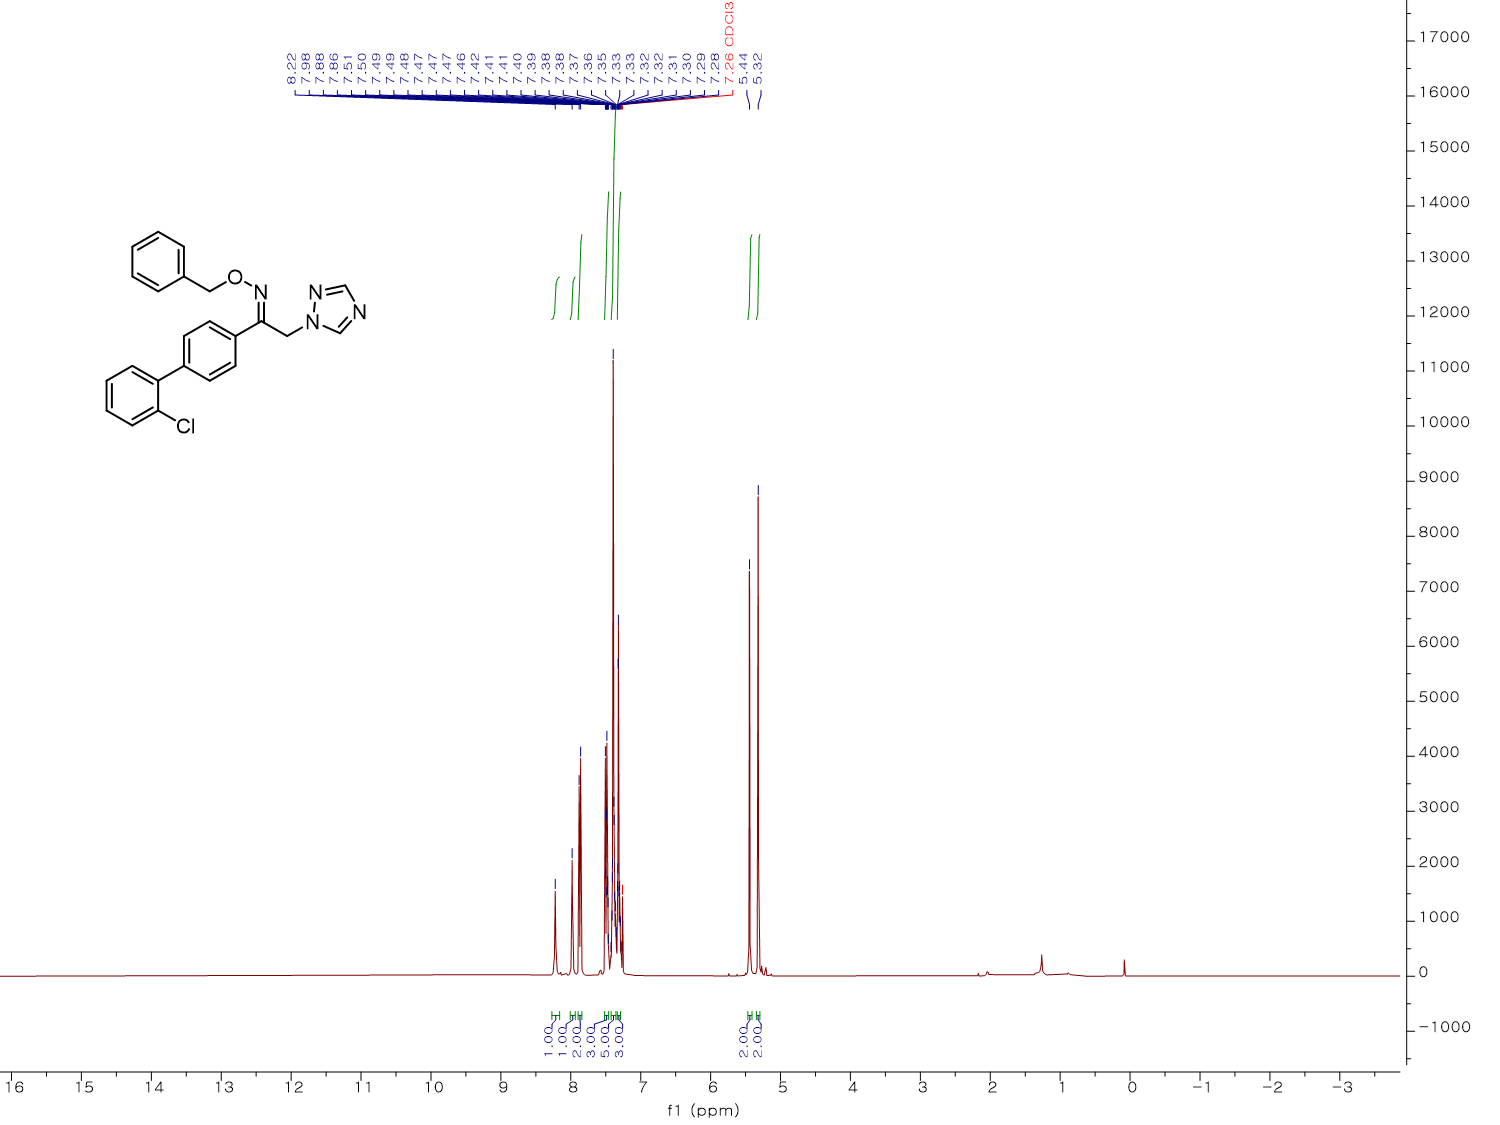
**

1H NMR spectrum (400 MHz, CDCl3) of **KH31**

**
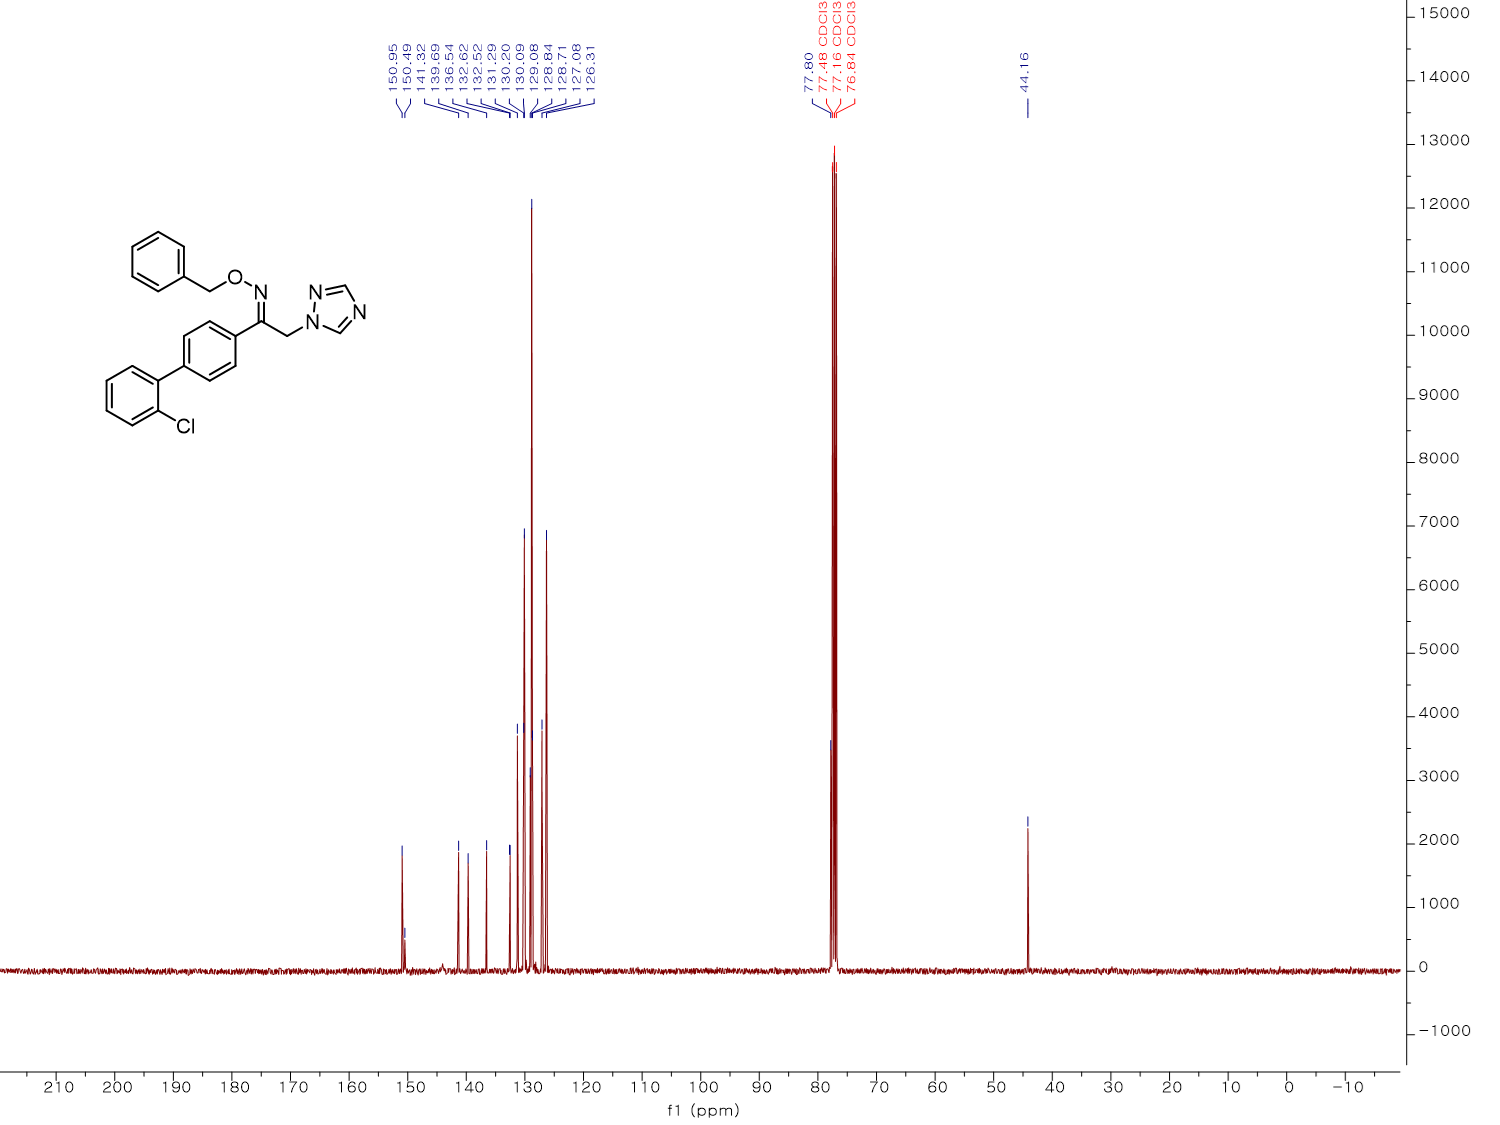
**

13C NMR spectrum (100 MHz, CDCl3) of **KH31**

**
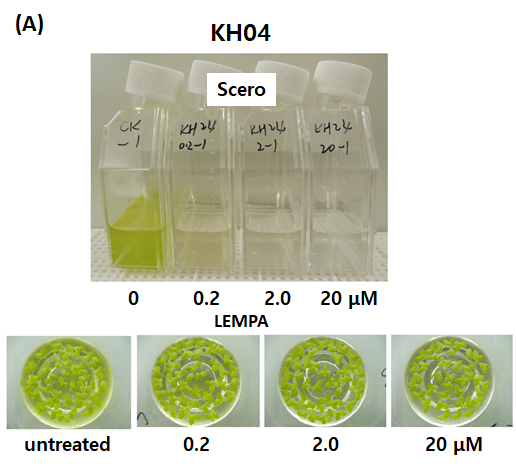

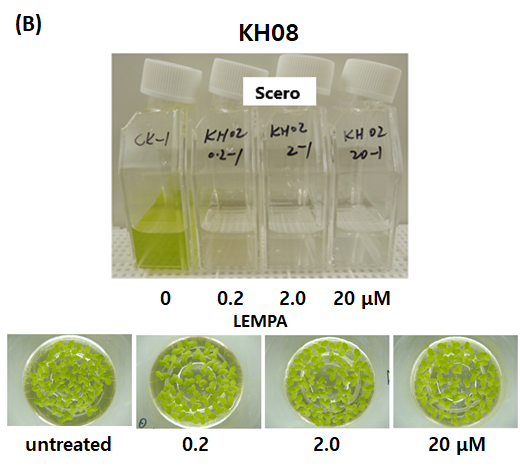
**

**
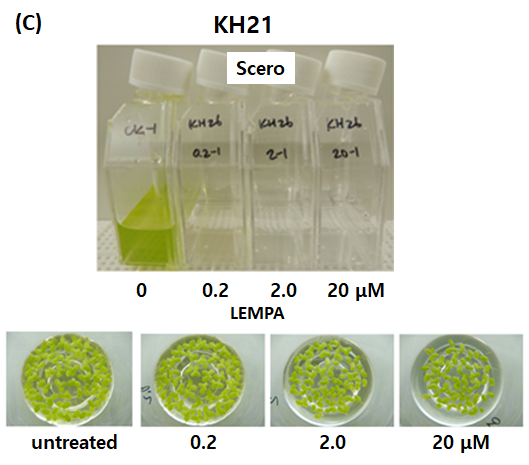
**

**Figure S1**. Pictures of growth inhibition responses of *Scenedesmus rotundus* (Scero) and *Lemna paucicostata* (LEMPA) treated with 3 concentrations of (A) **KH04**, (B) **KH08**, and (C) **KH21**.
